# Supplementary material for: Effective 1,5-, 1,6- and 1,7-remote stereocontrol in reactions of alkoxy- and hydroxy-substituted allylstannanes with aldehydes
Source: Royal Society of Chemistry journal article supplement (doi:10.1039/c0ob01084g), 2011-01-01

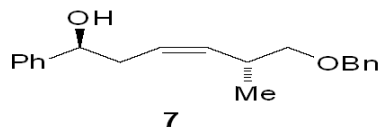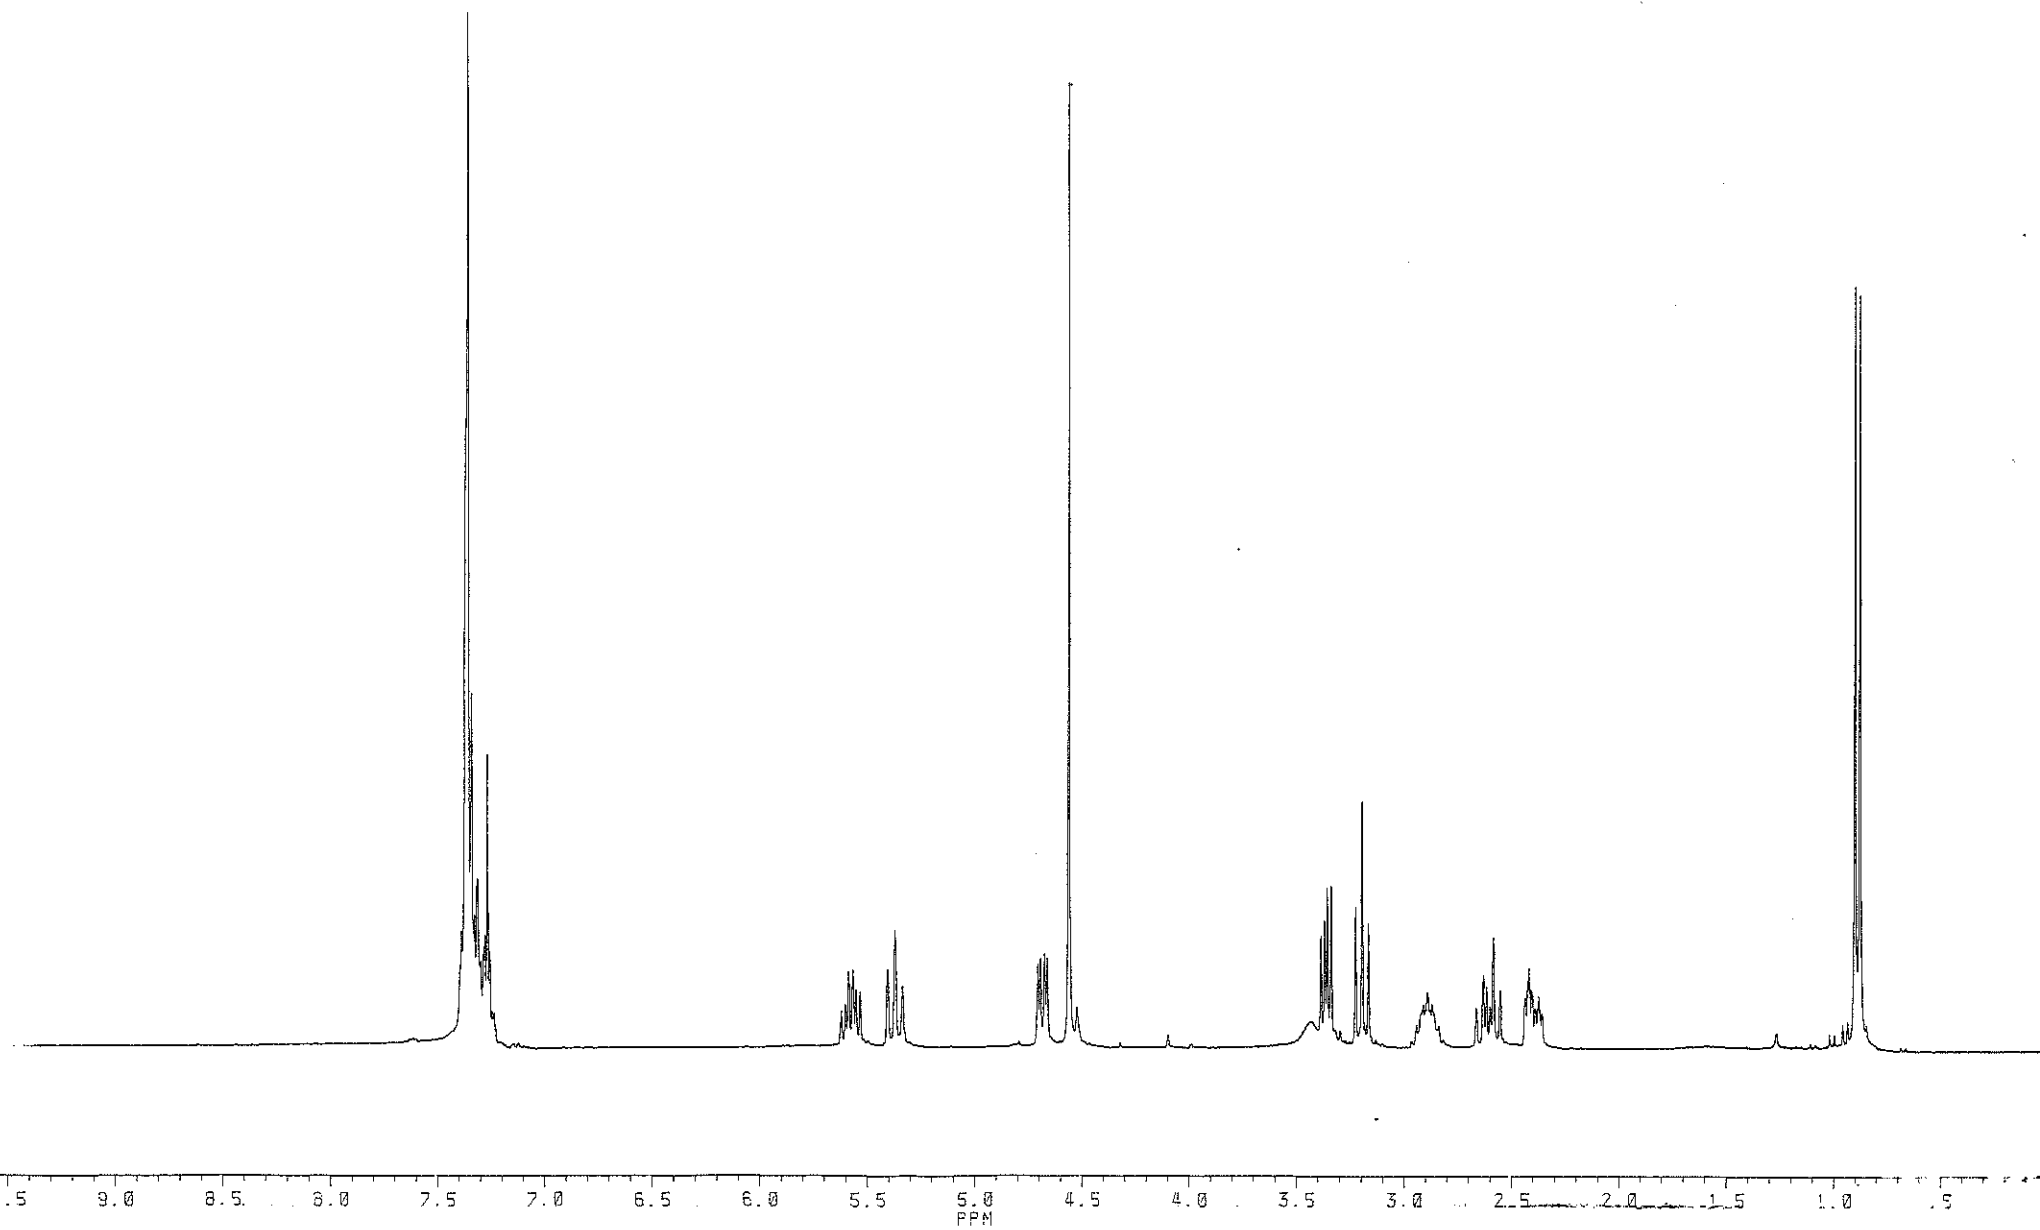

PPM

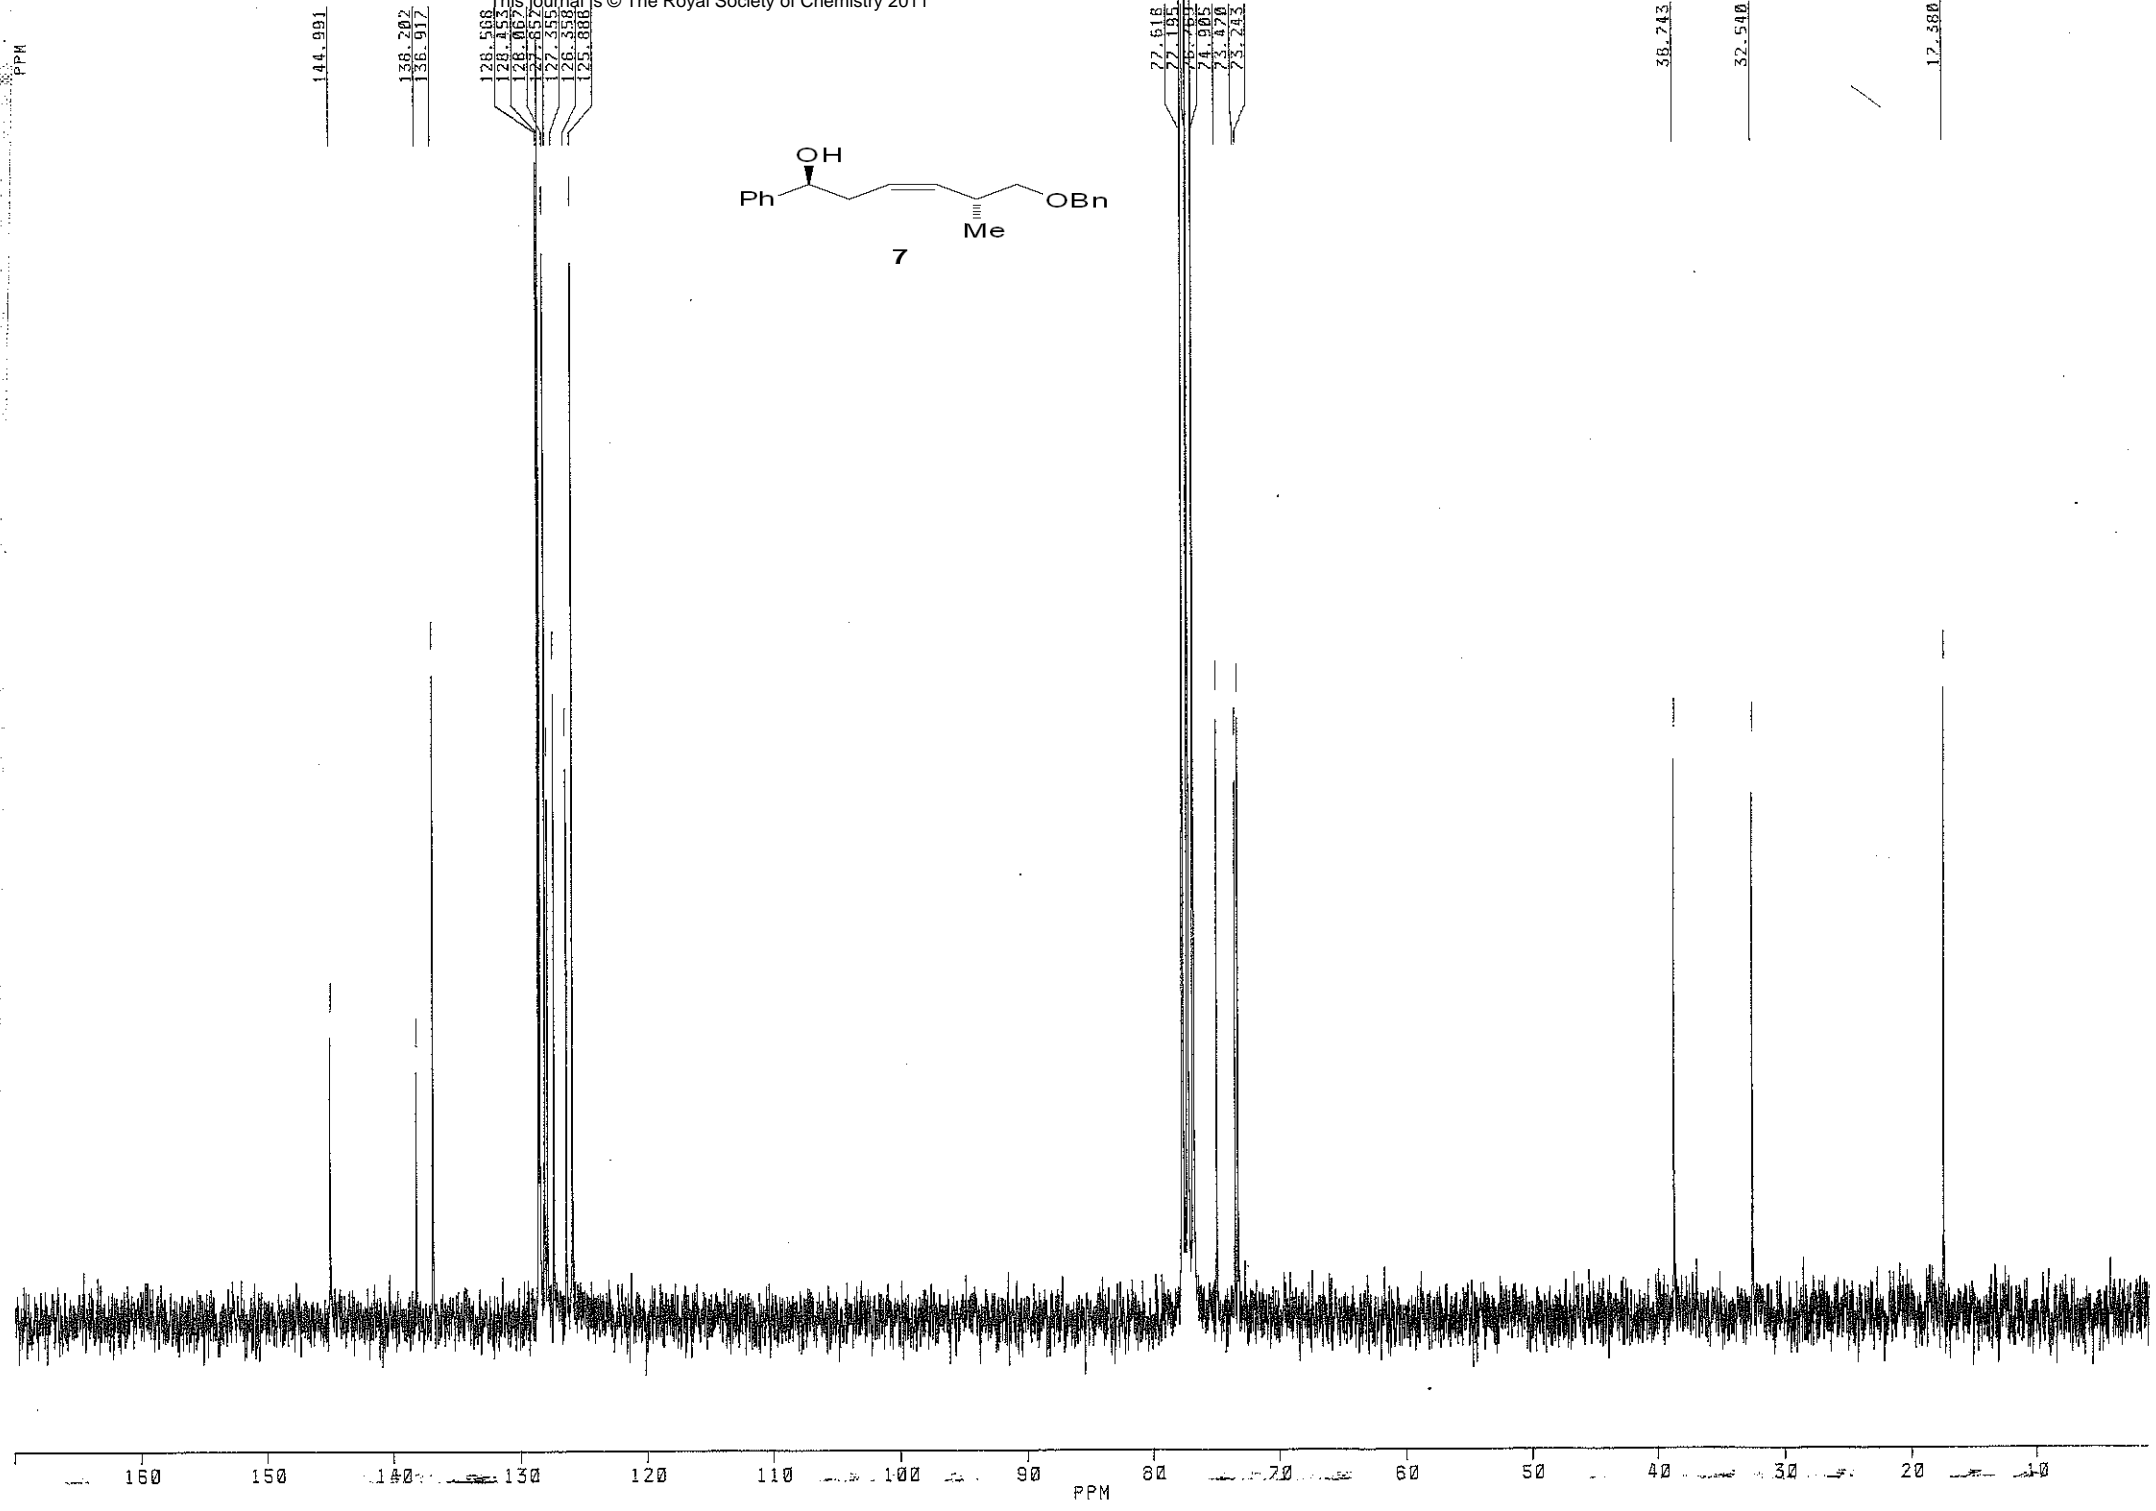

8

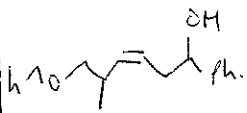

diastereoisomers of HPLC column  
(sun)  
~~other product~~

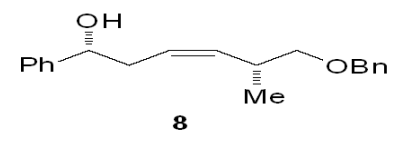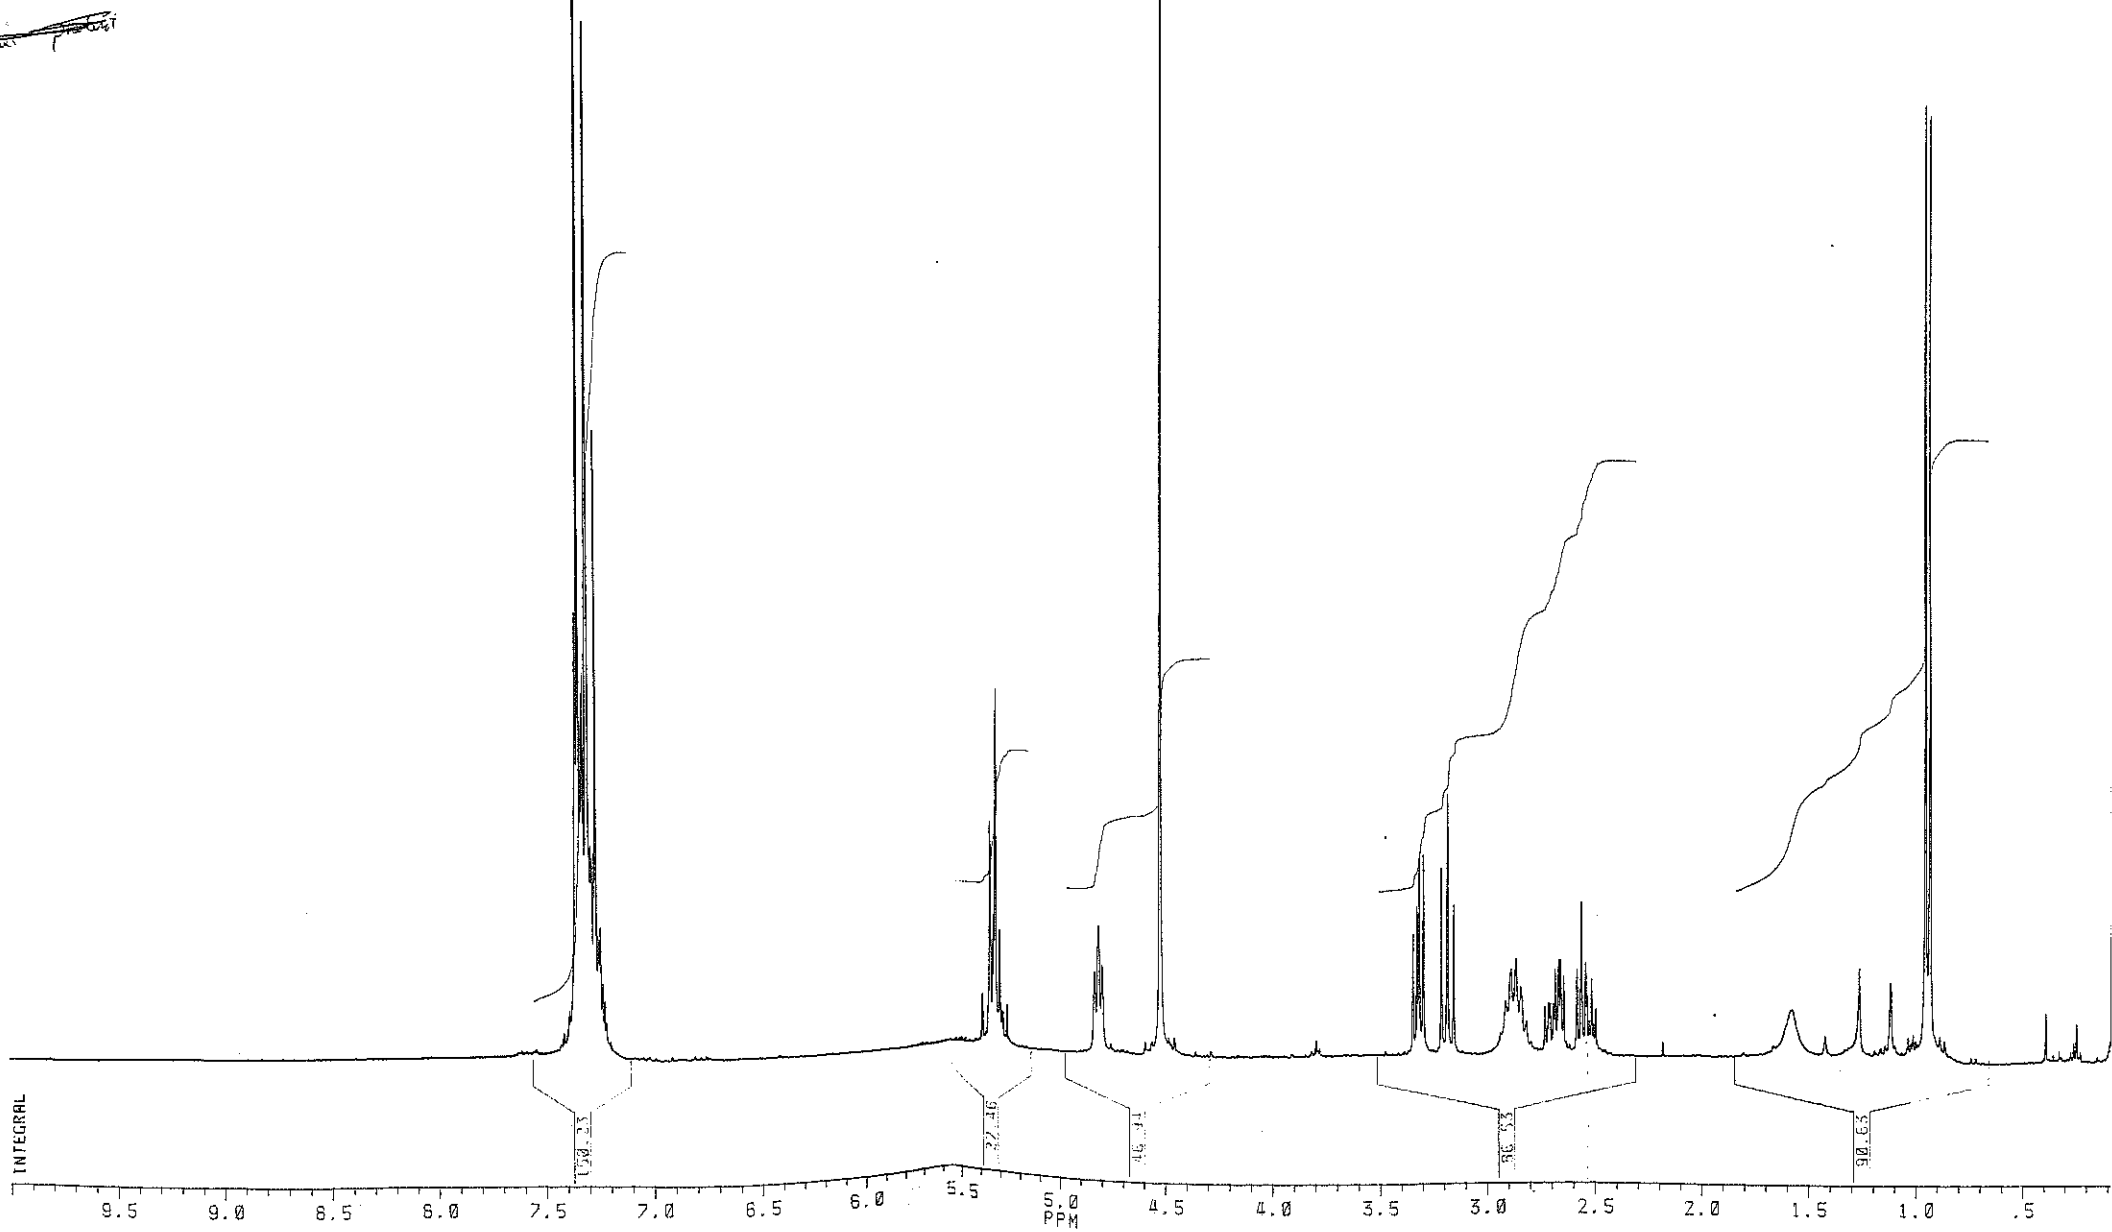

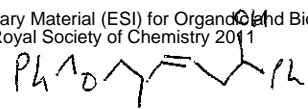

unseparated.

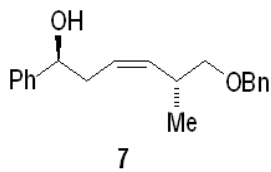

and

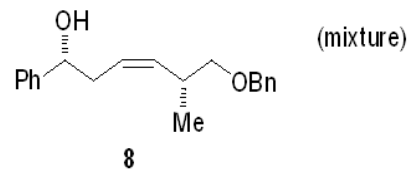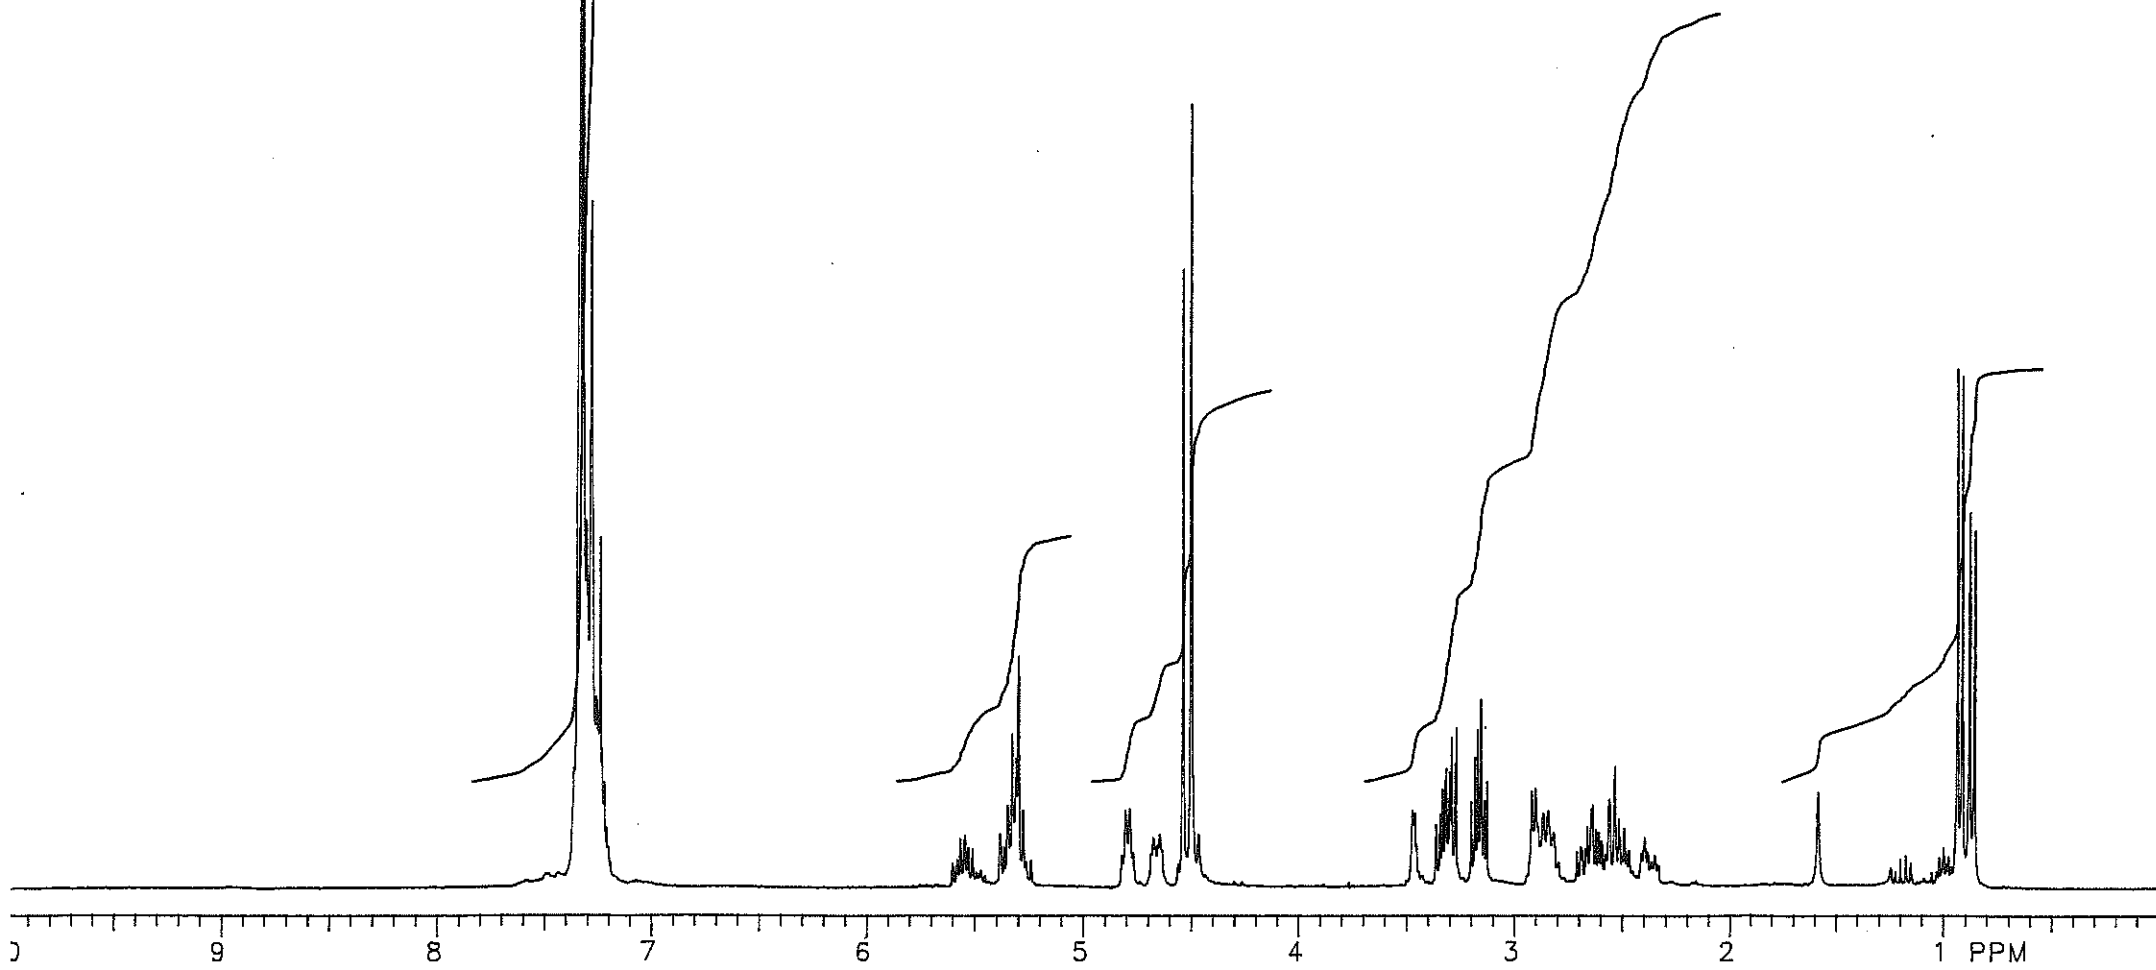

(2)

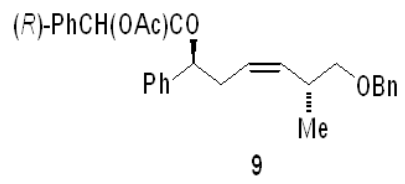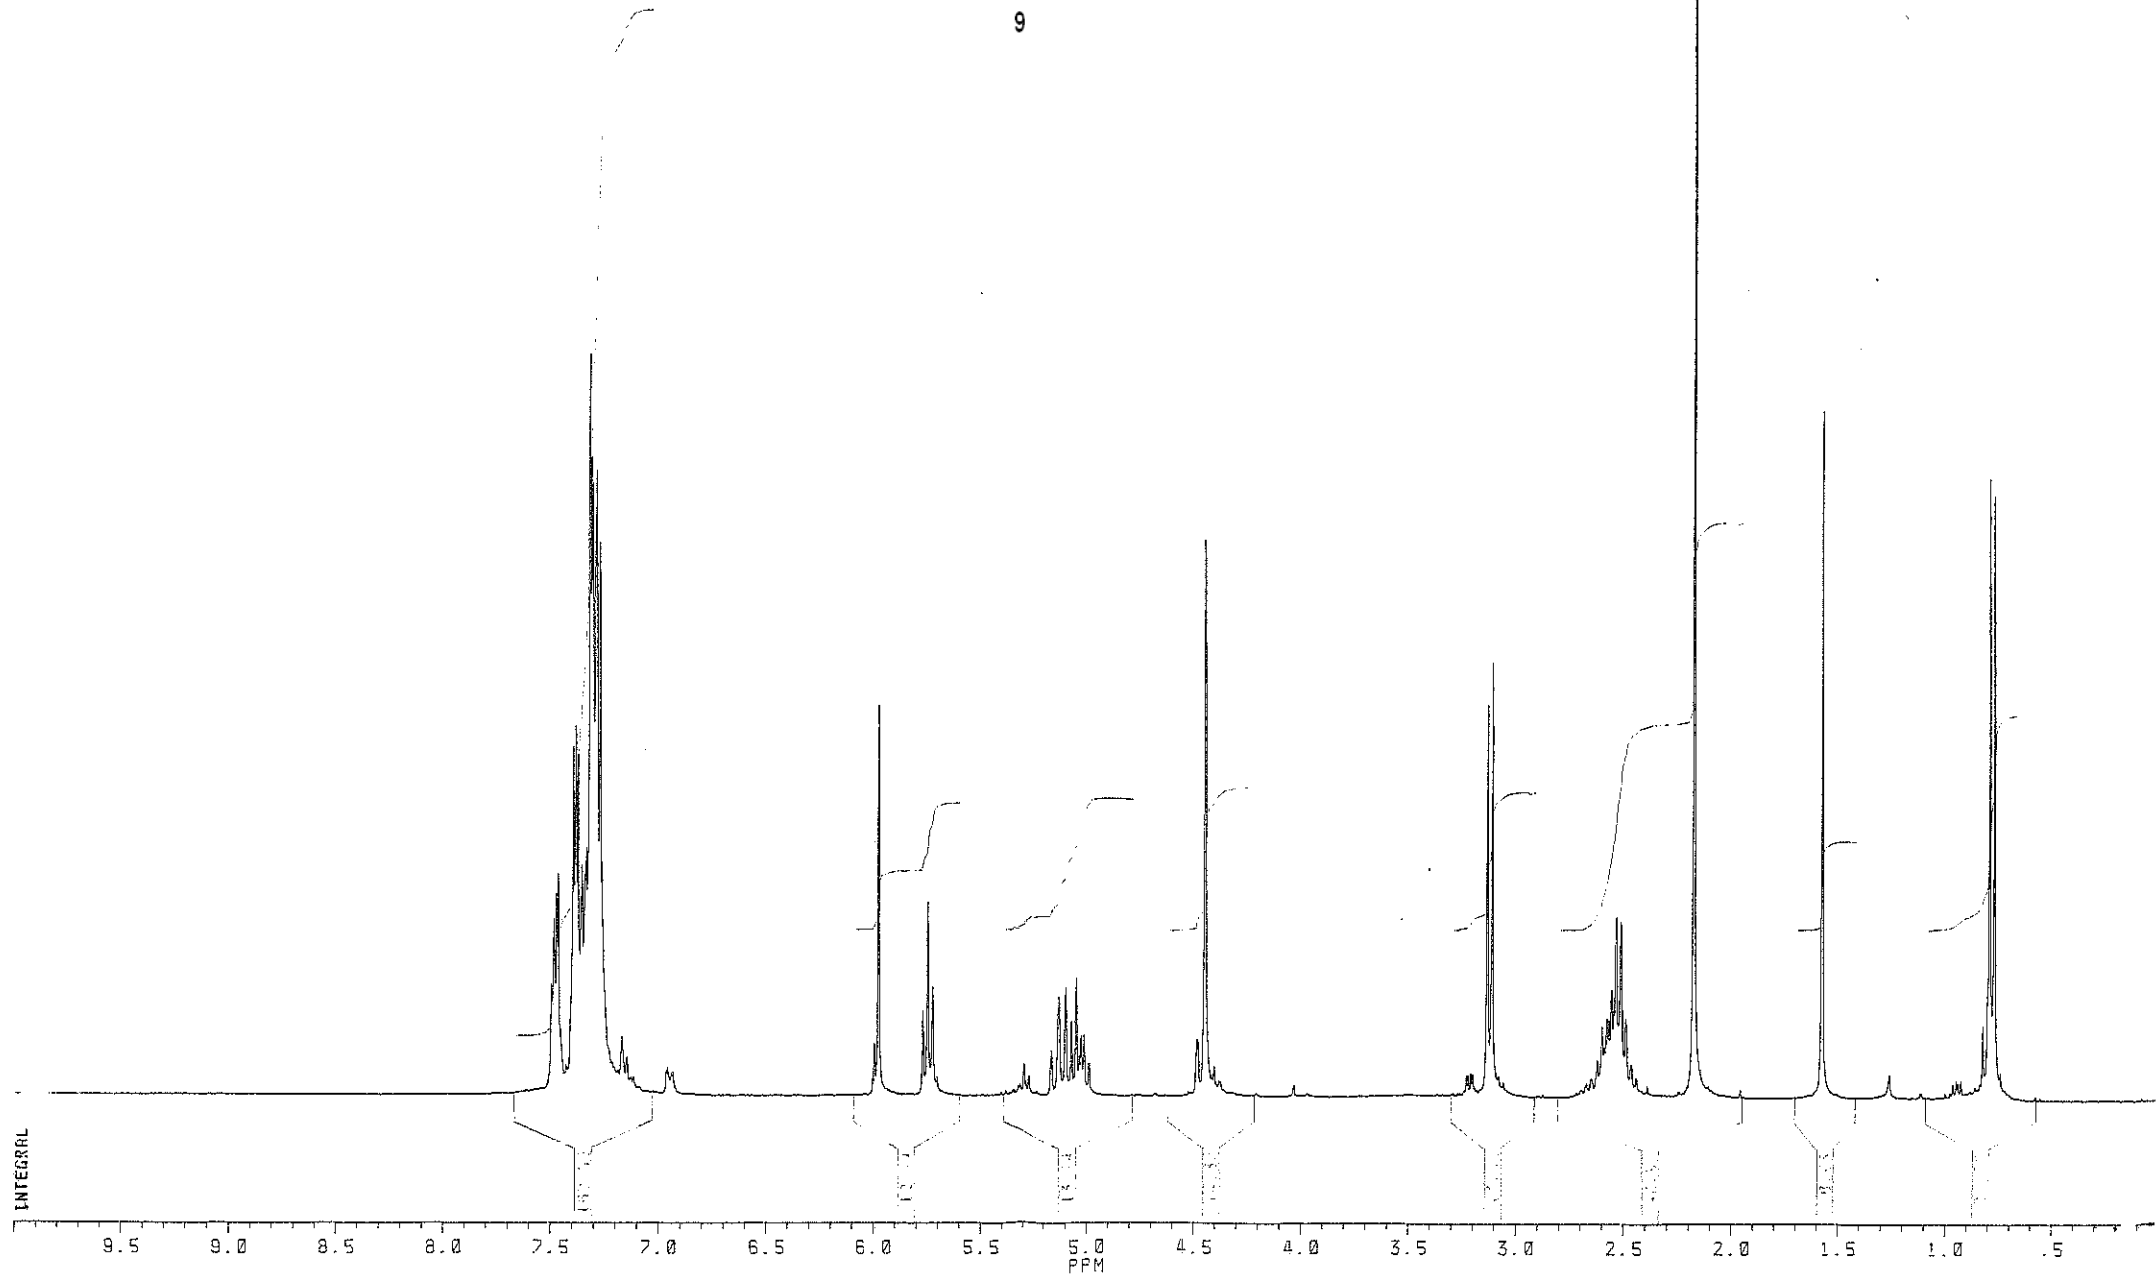

(S)

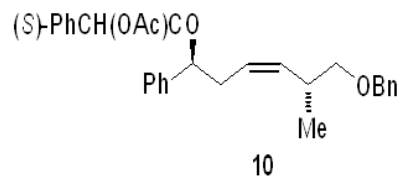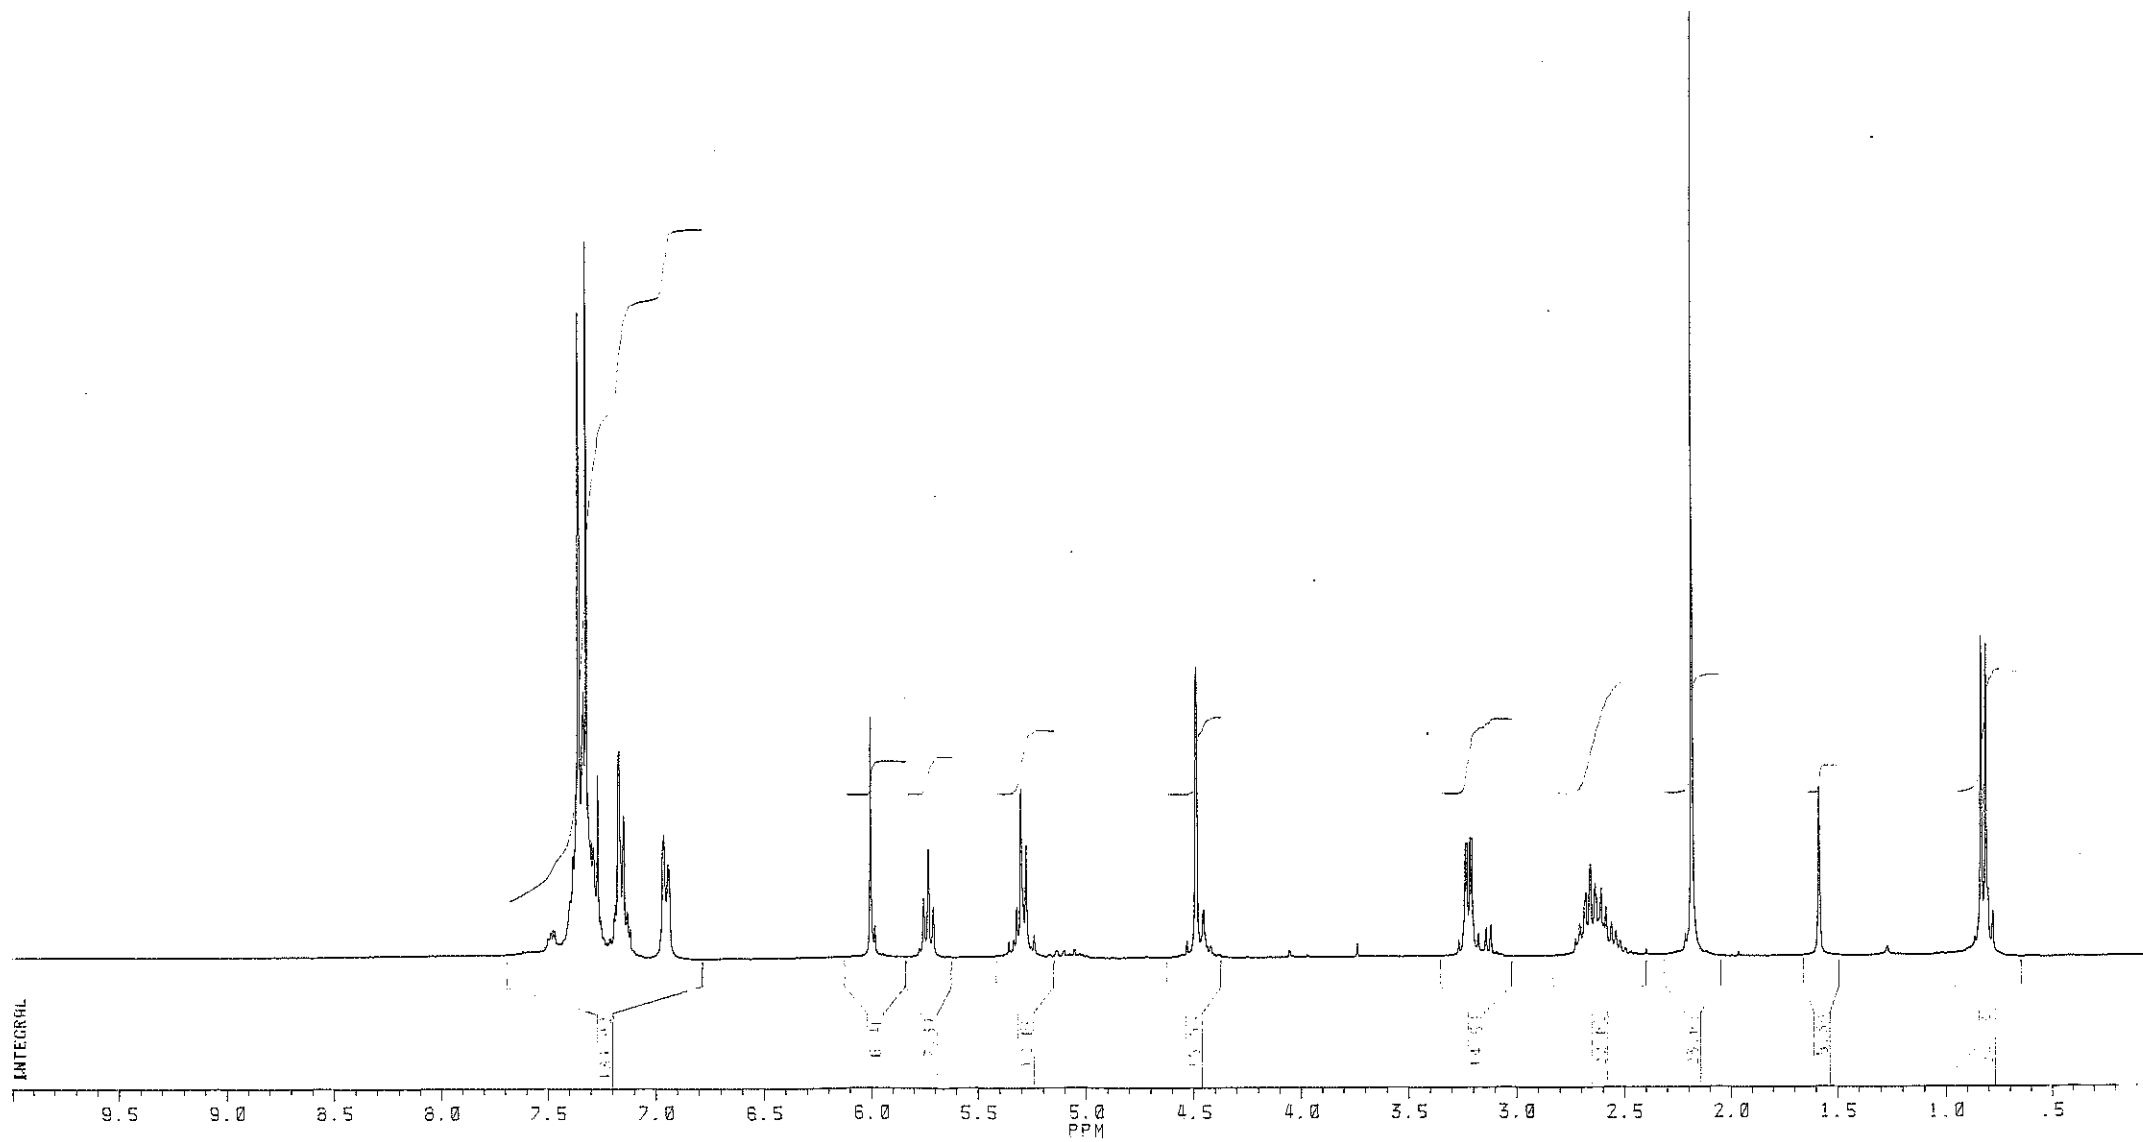

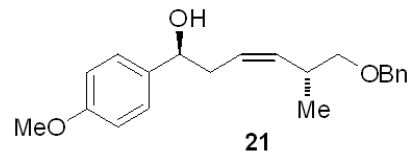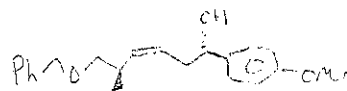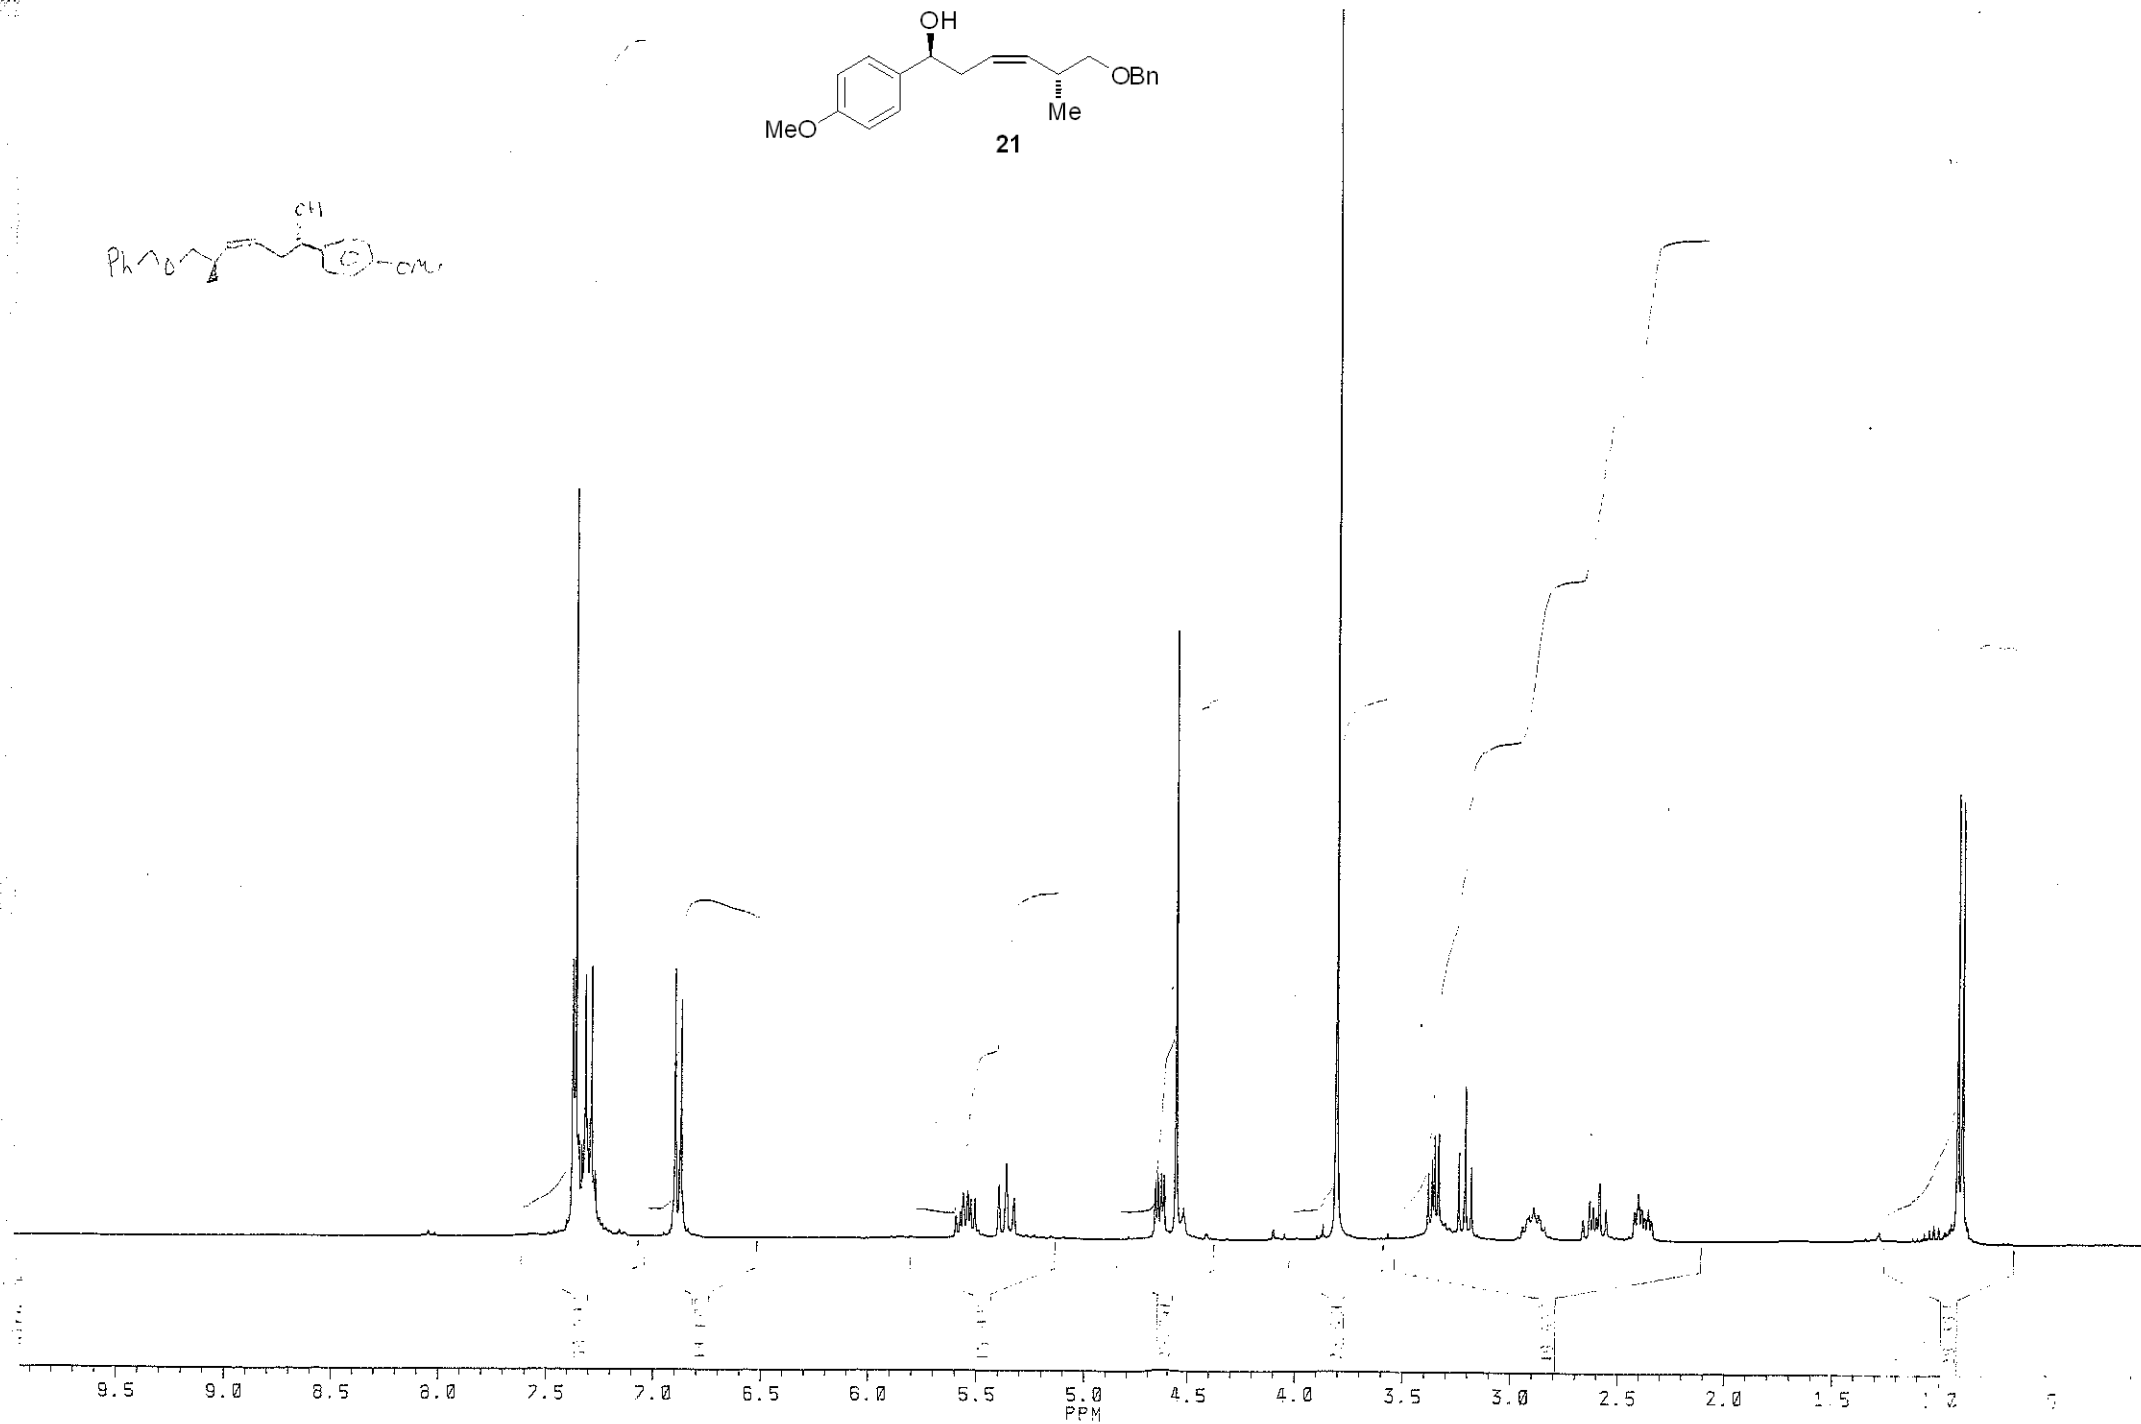

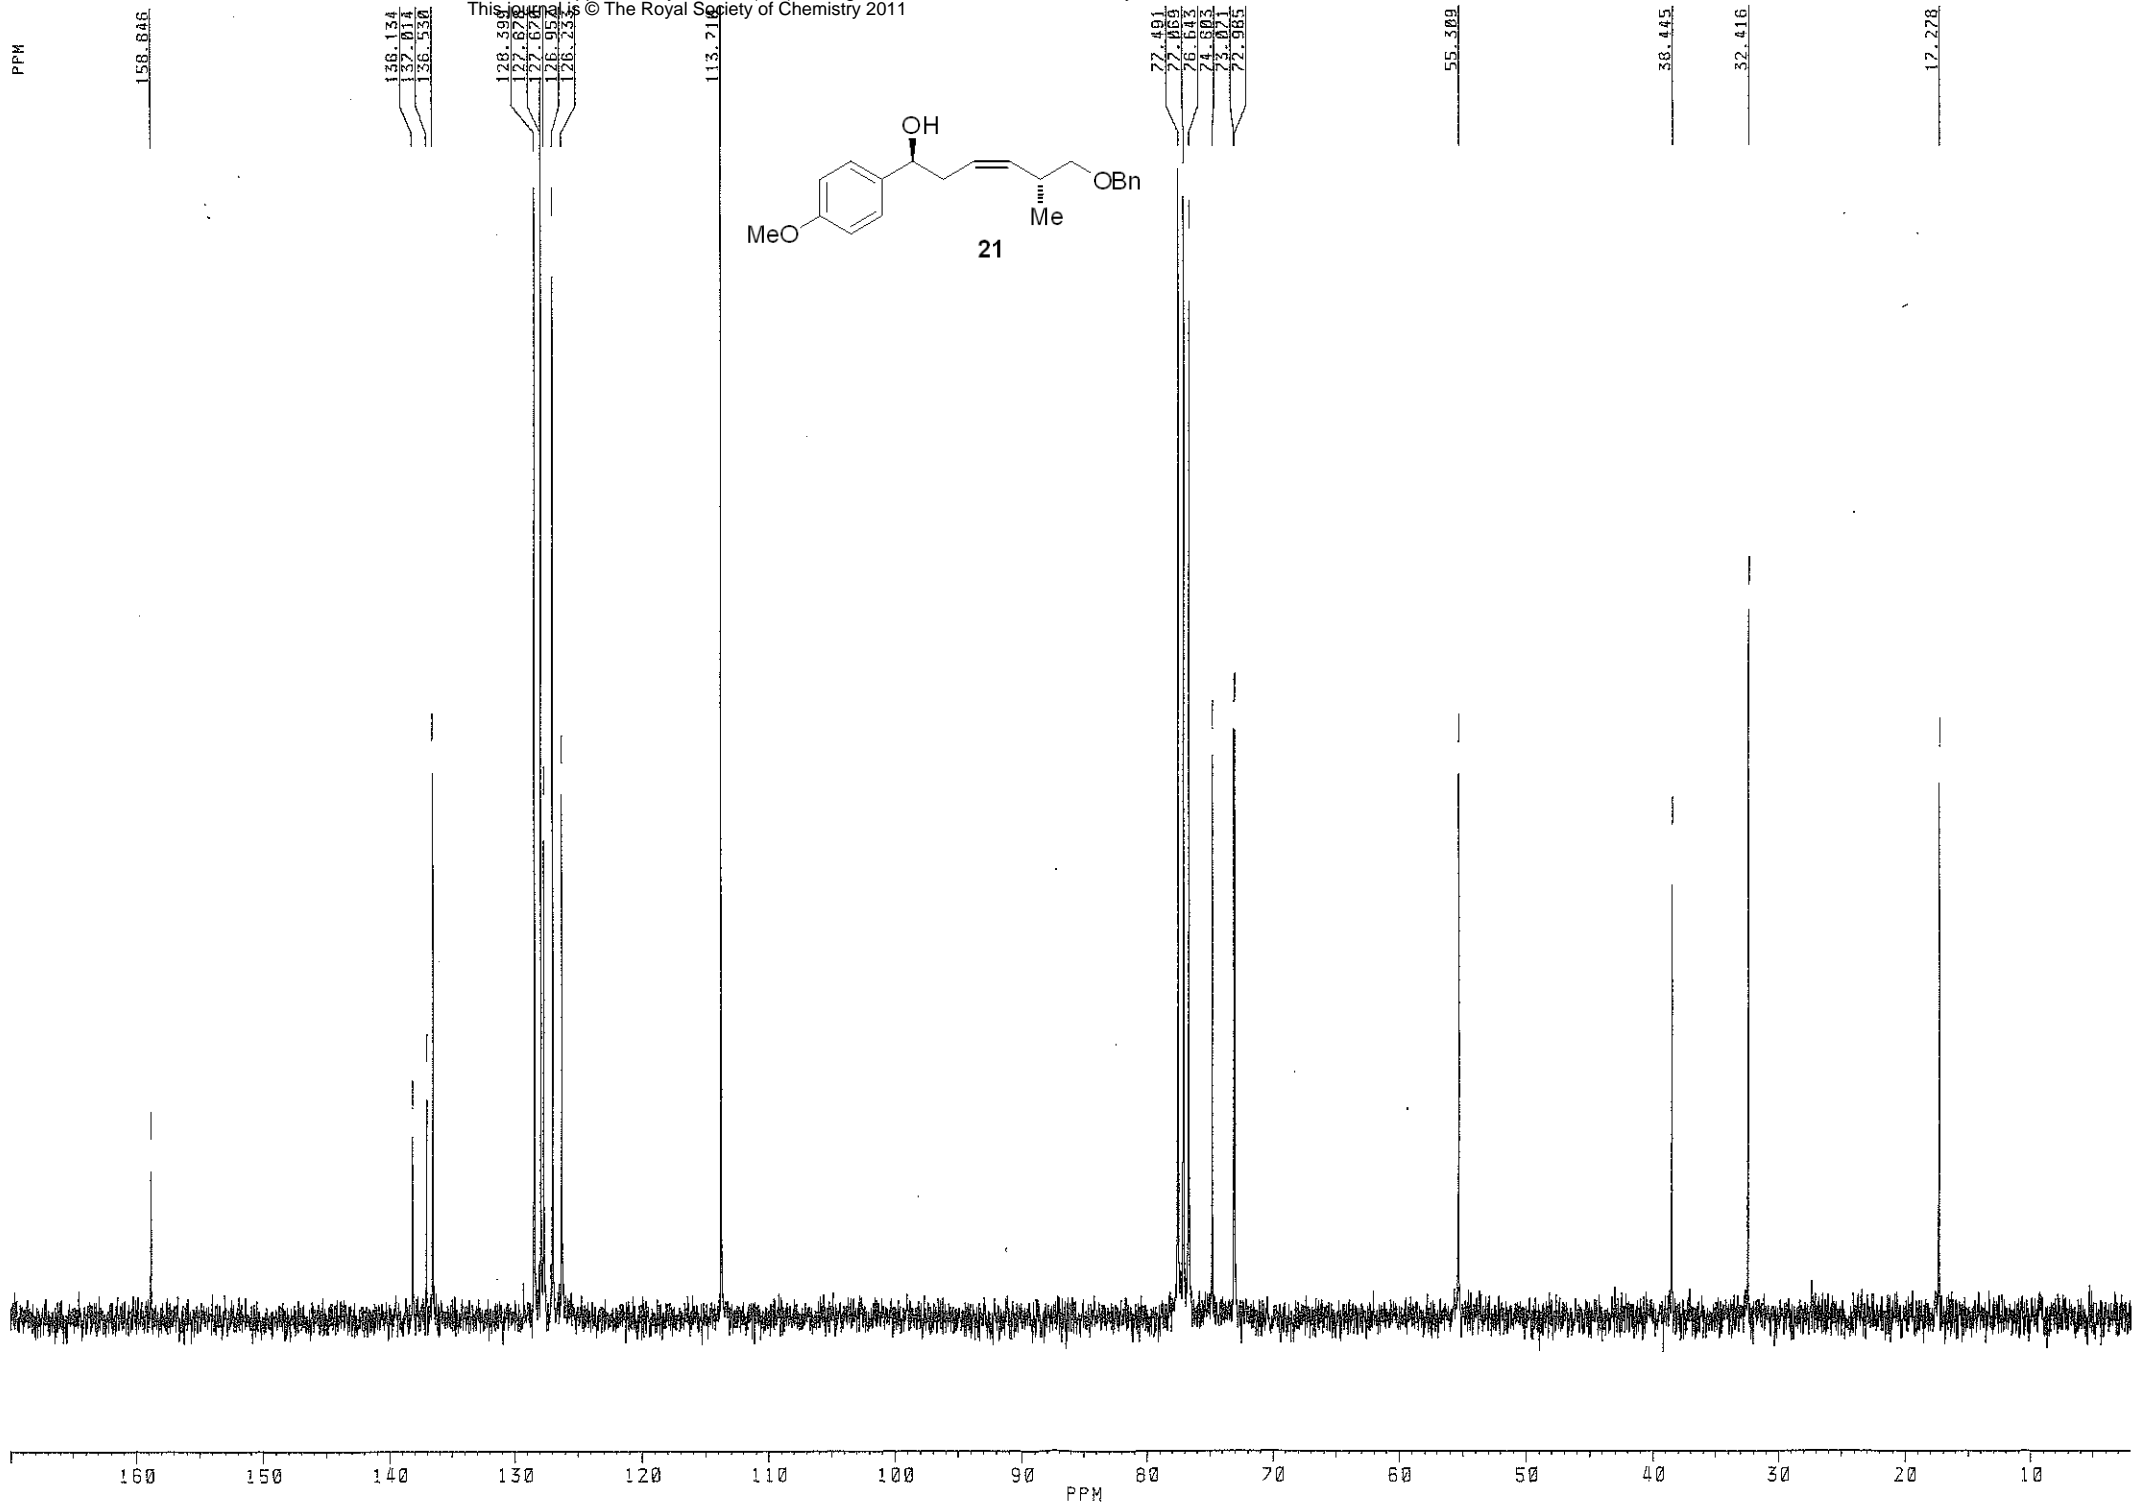



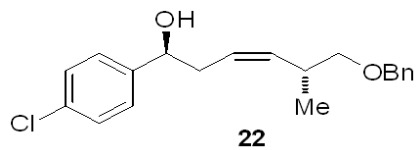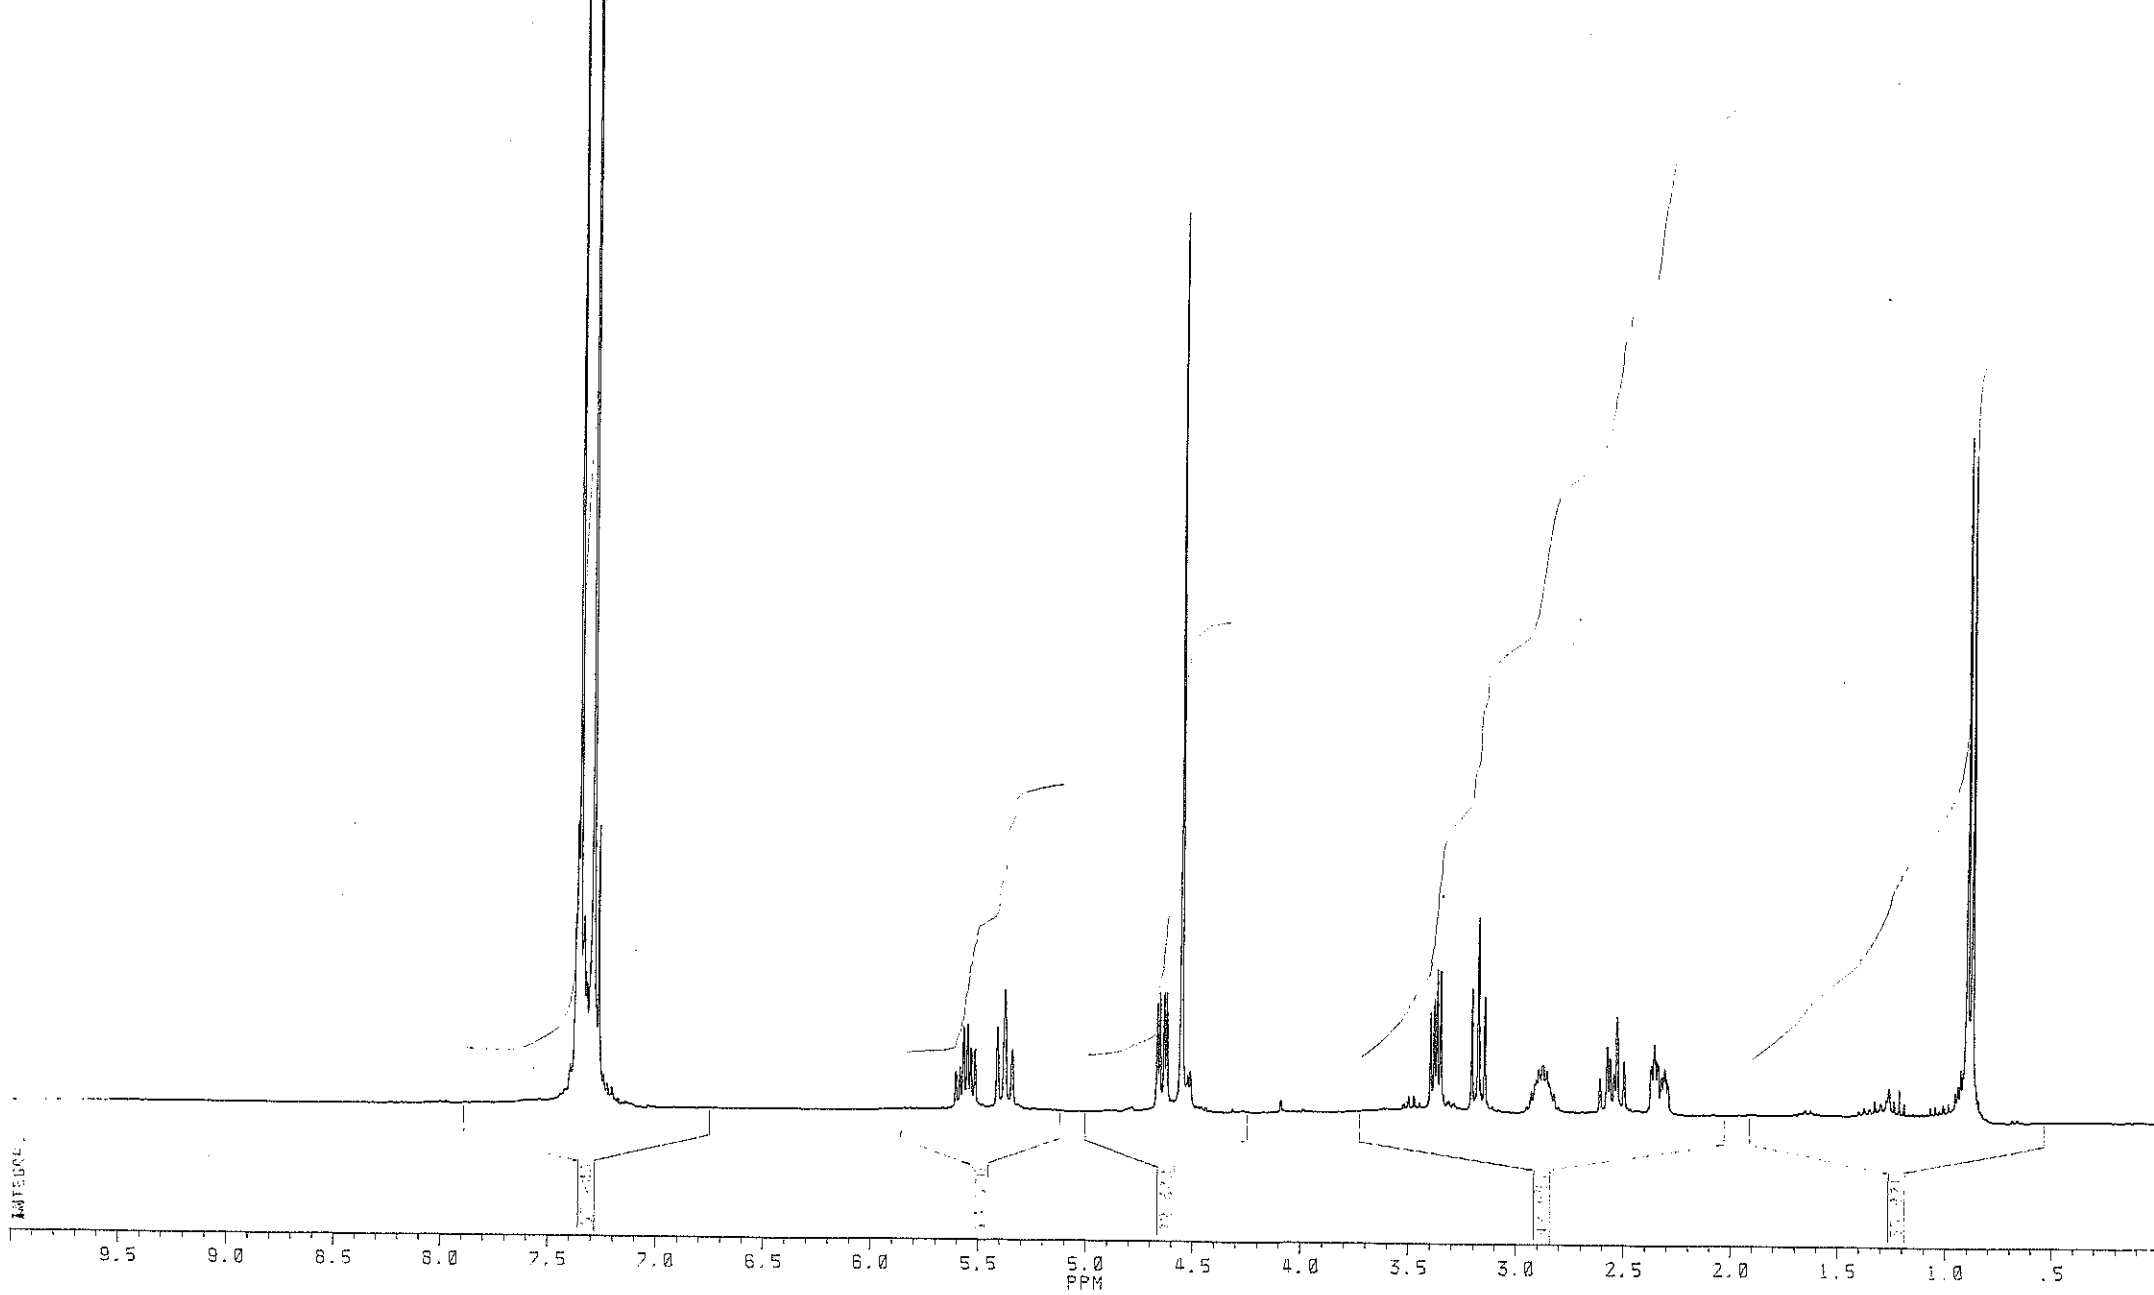

PPM

143.421  
137.801  
137.158  
132.711  
128.438  
128.373  
127.987  
127.775  
127.187  
125.916

77.455  
77.237  
77.019  
76.801  
74.735  
73.152  
72.568

38.669

32.398

17.151

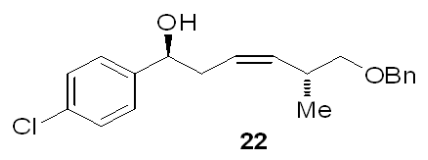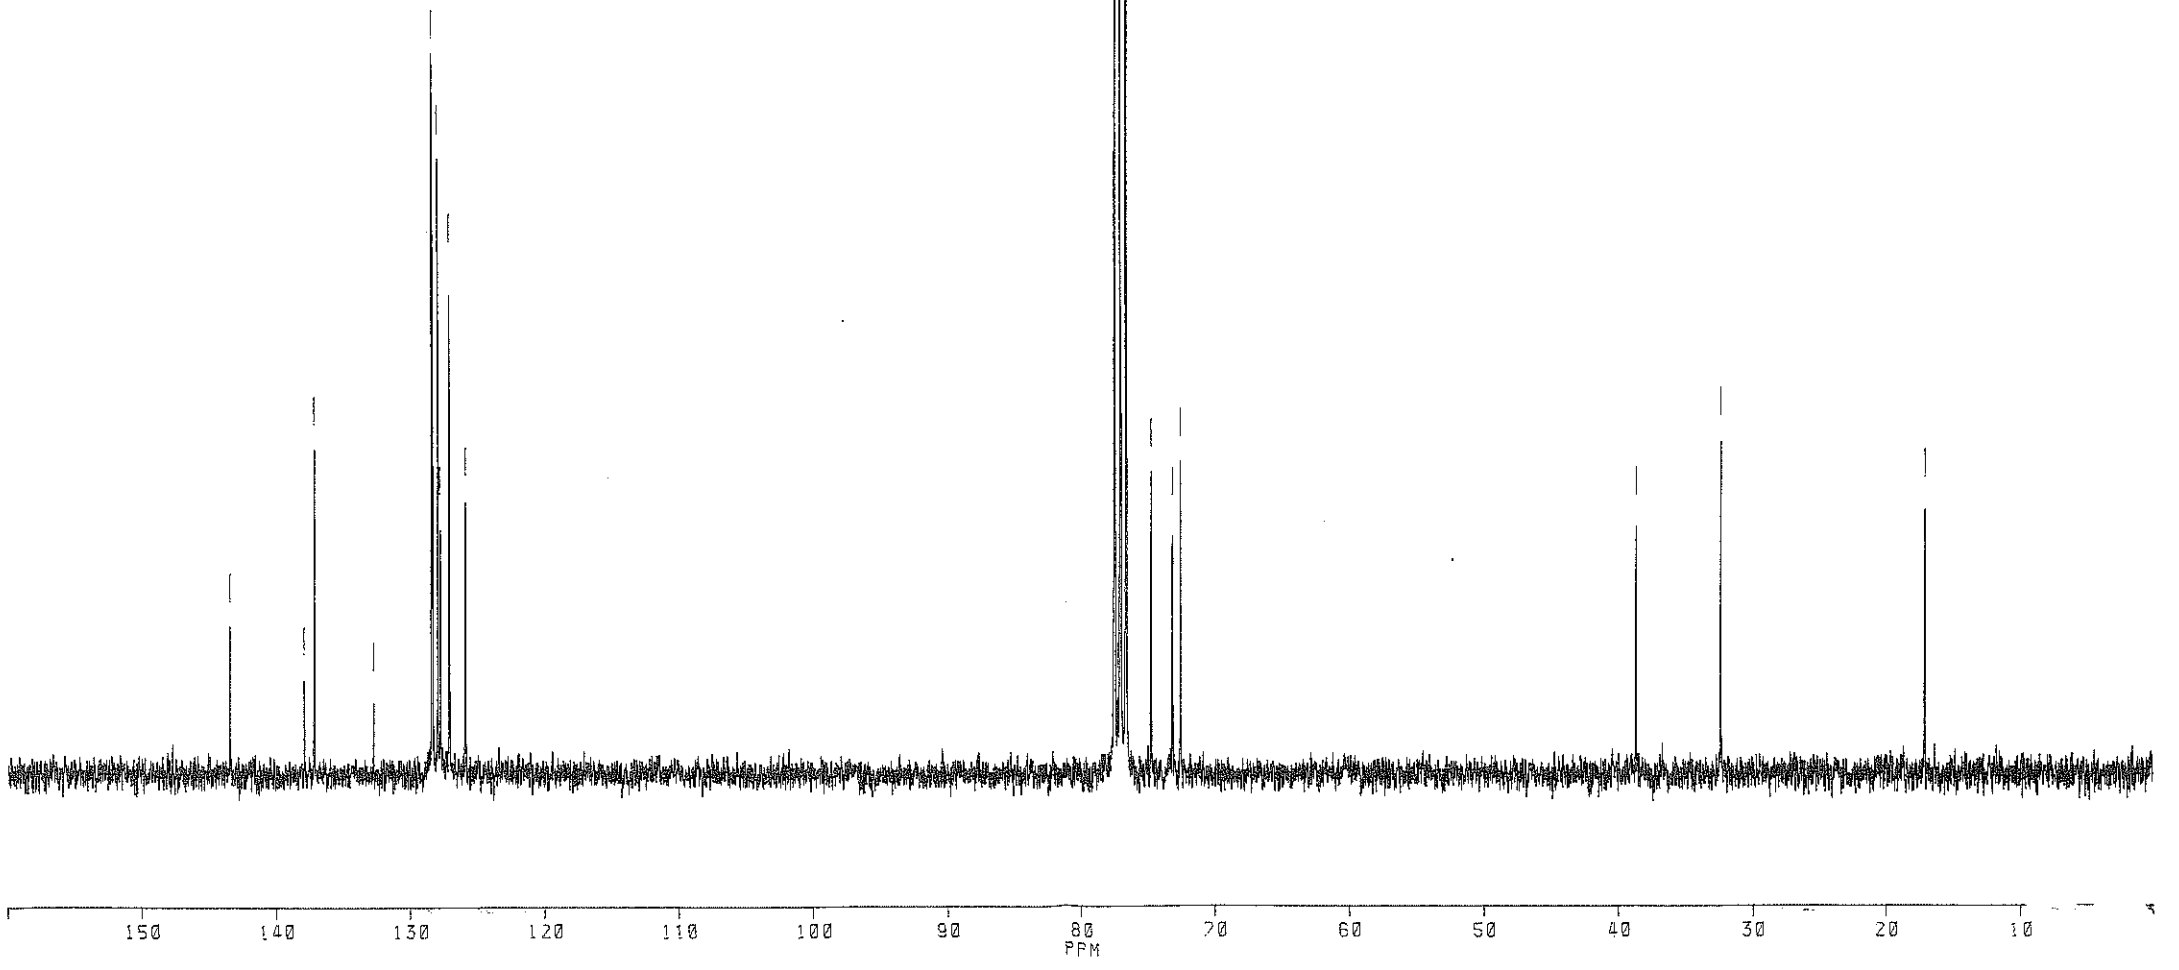

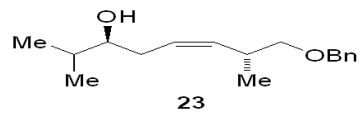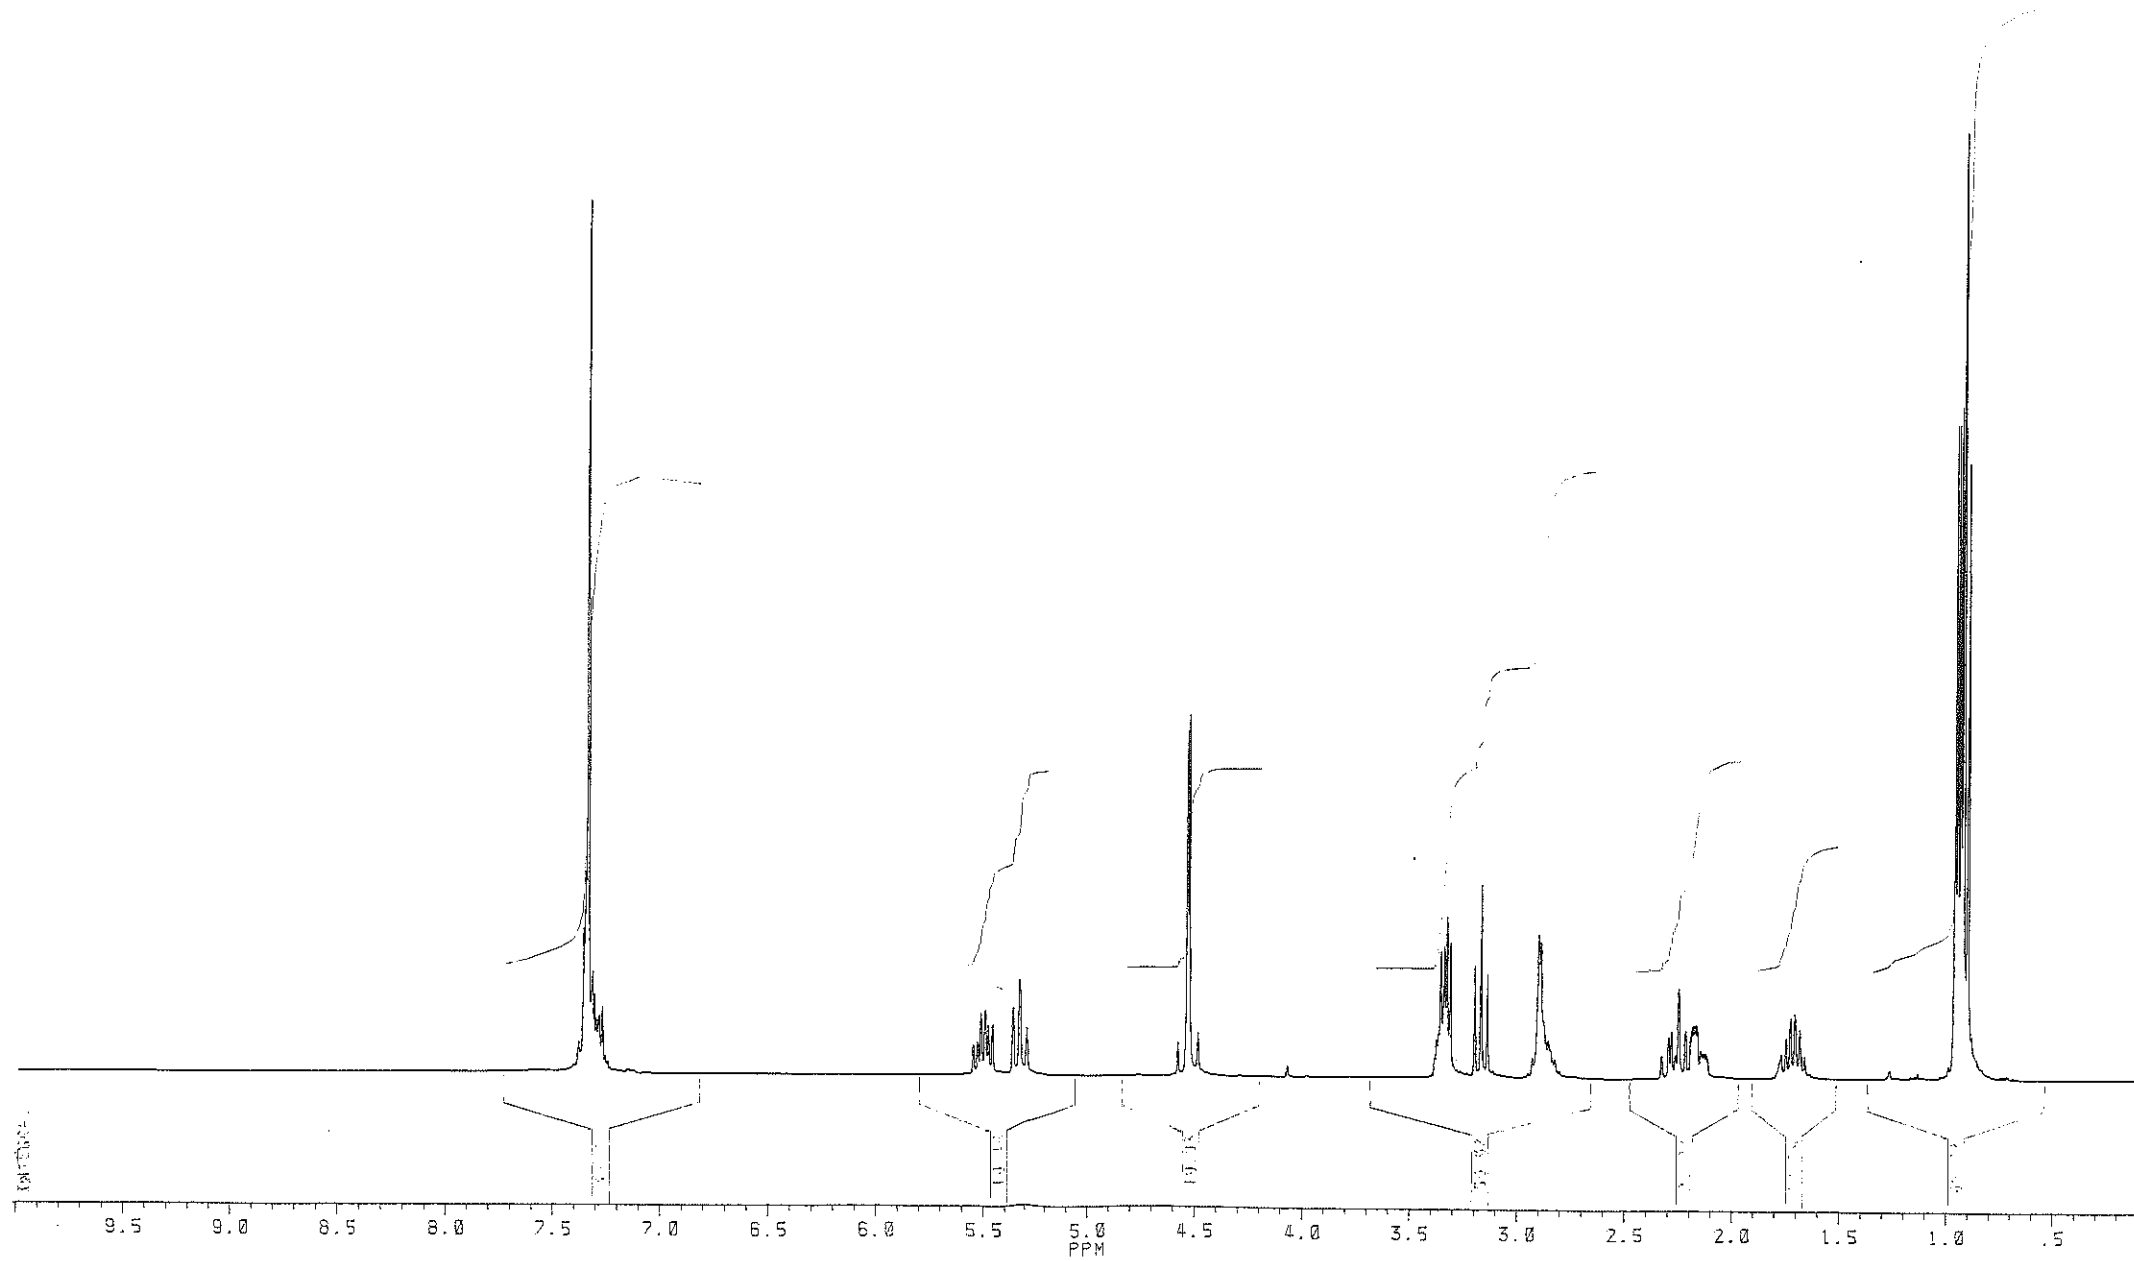

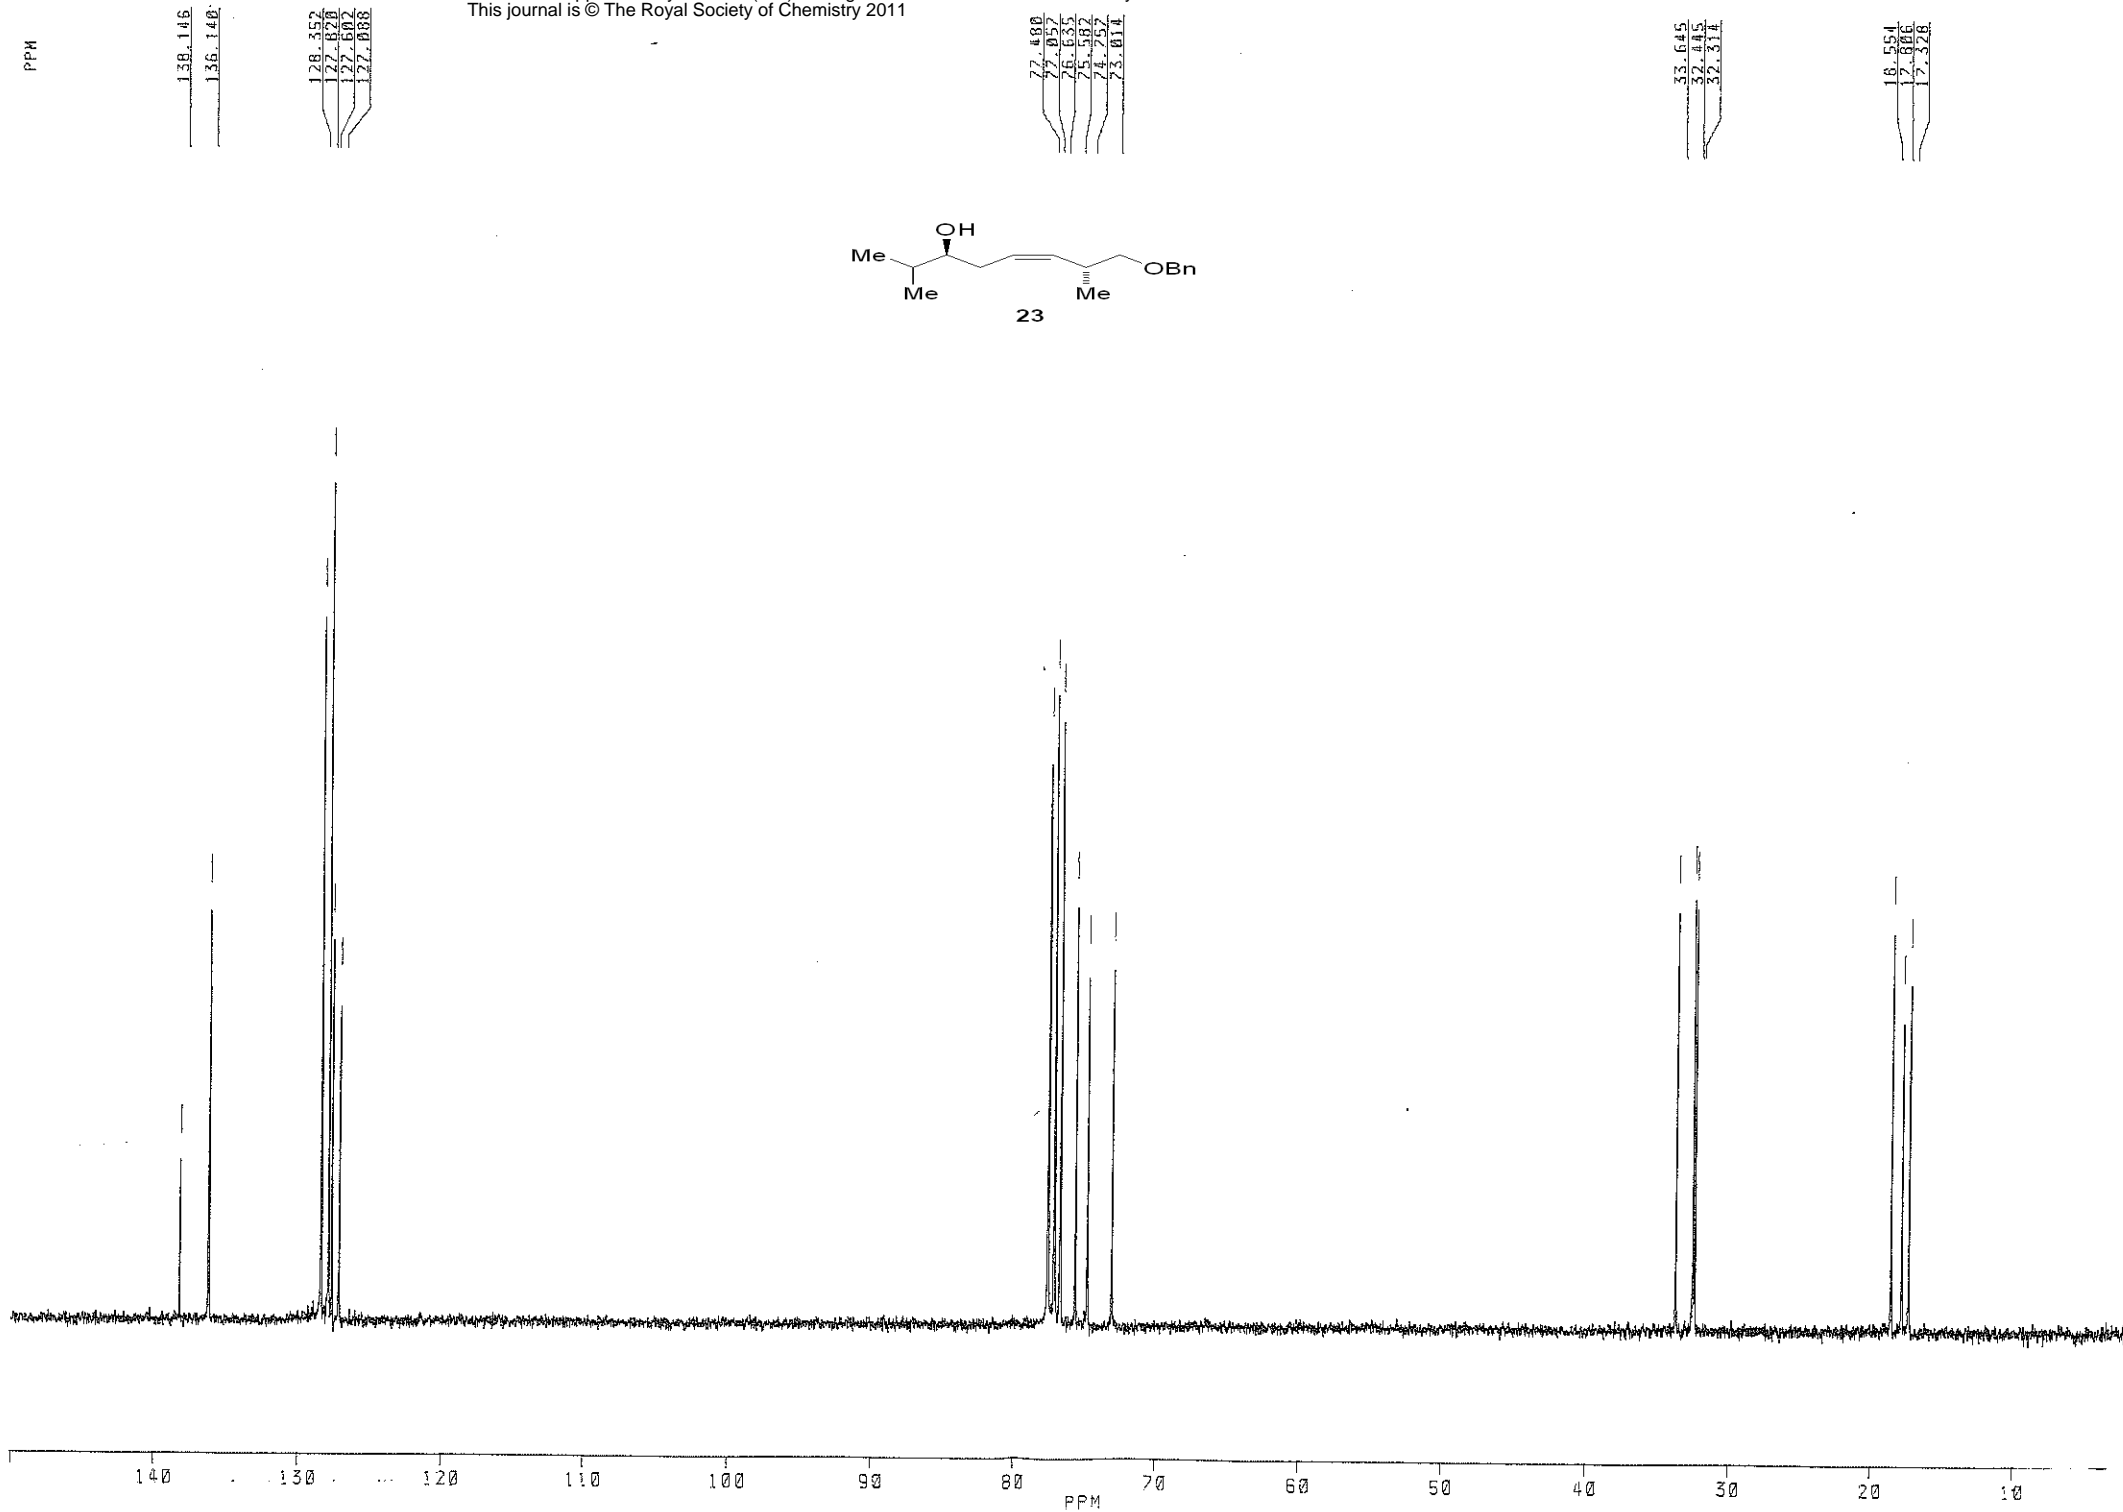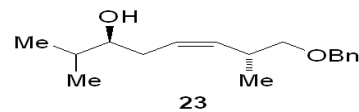

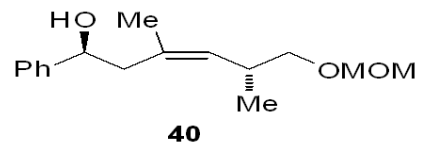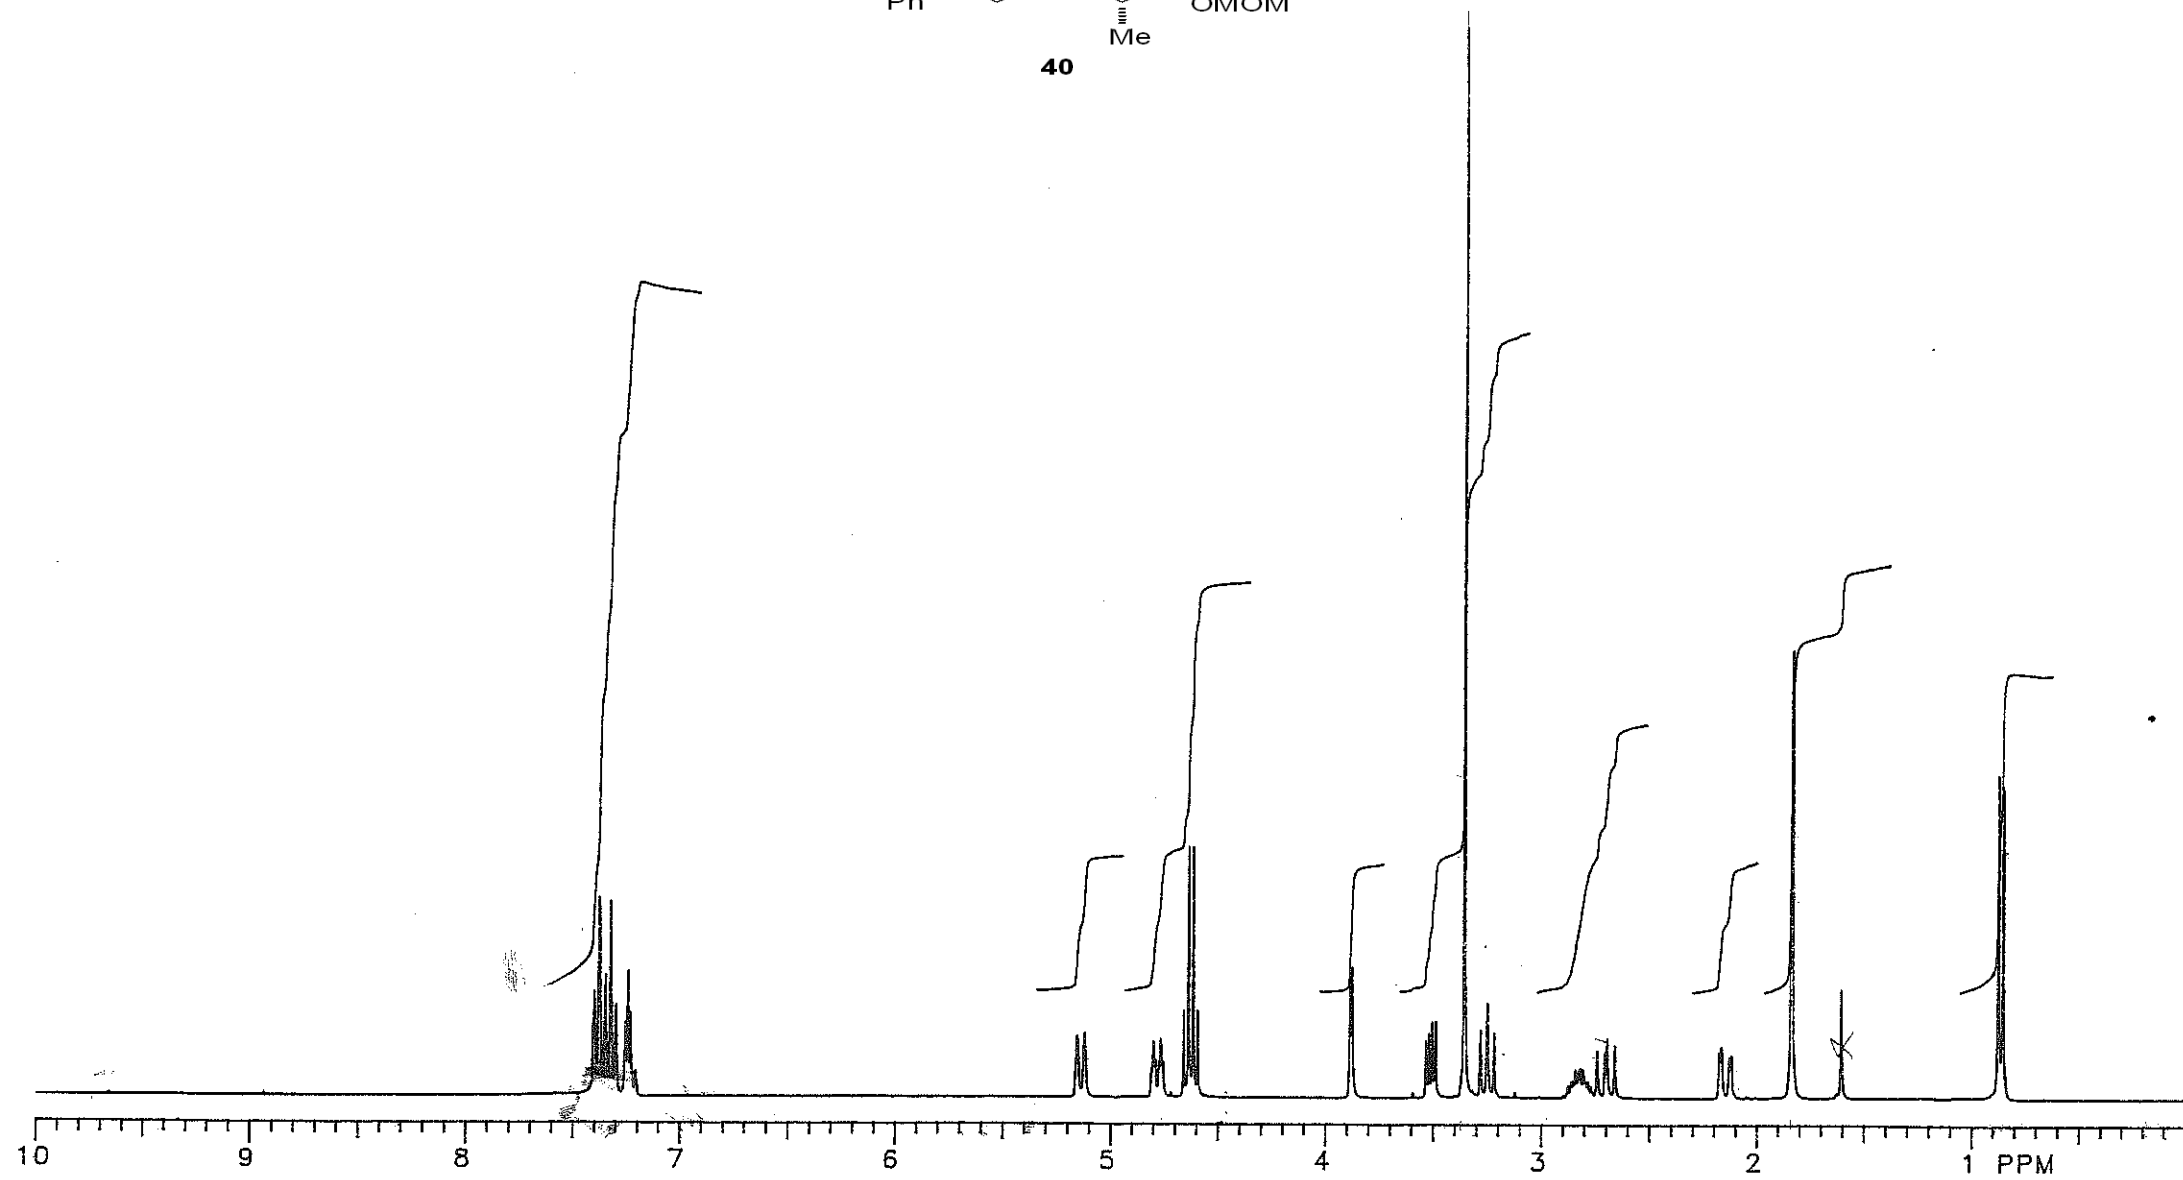

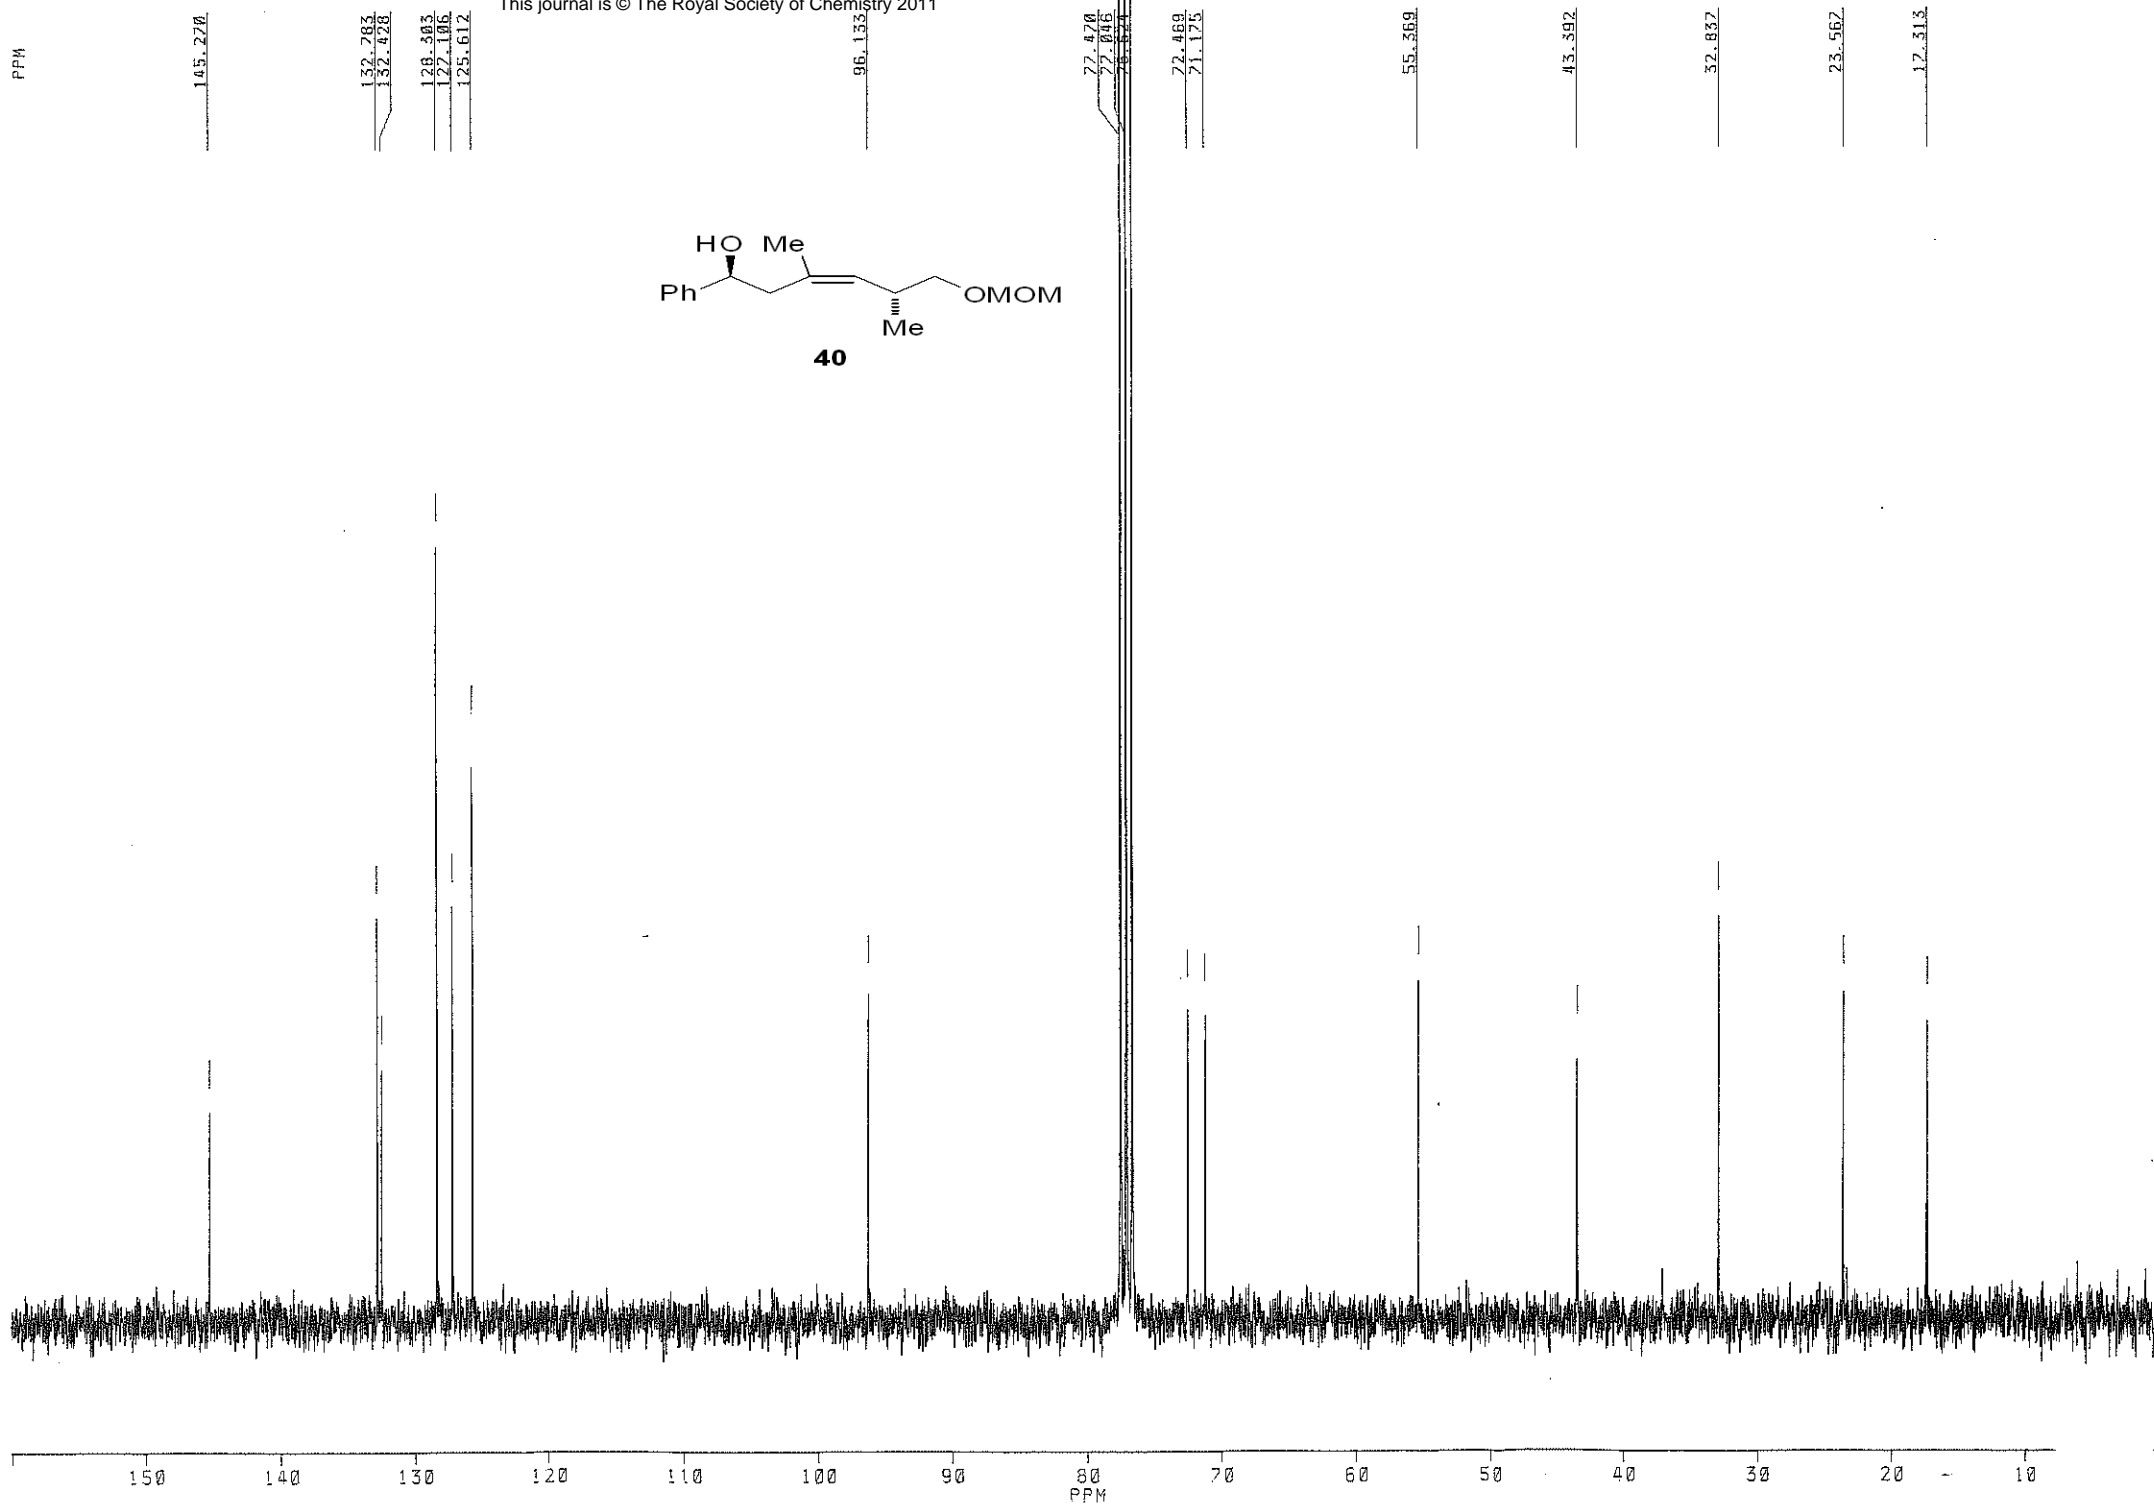

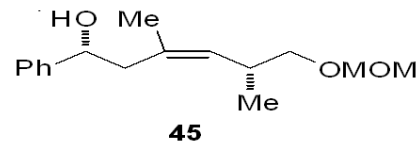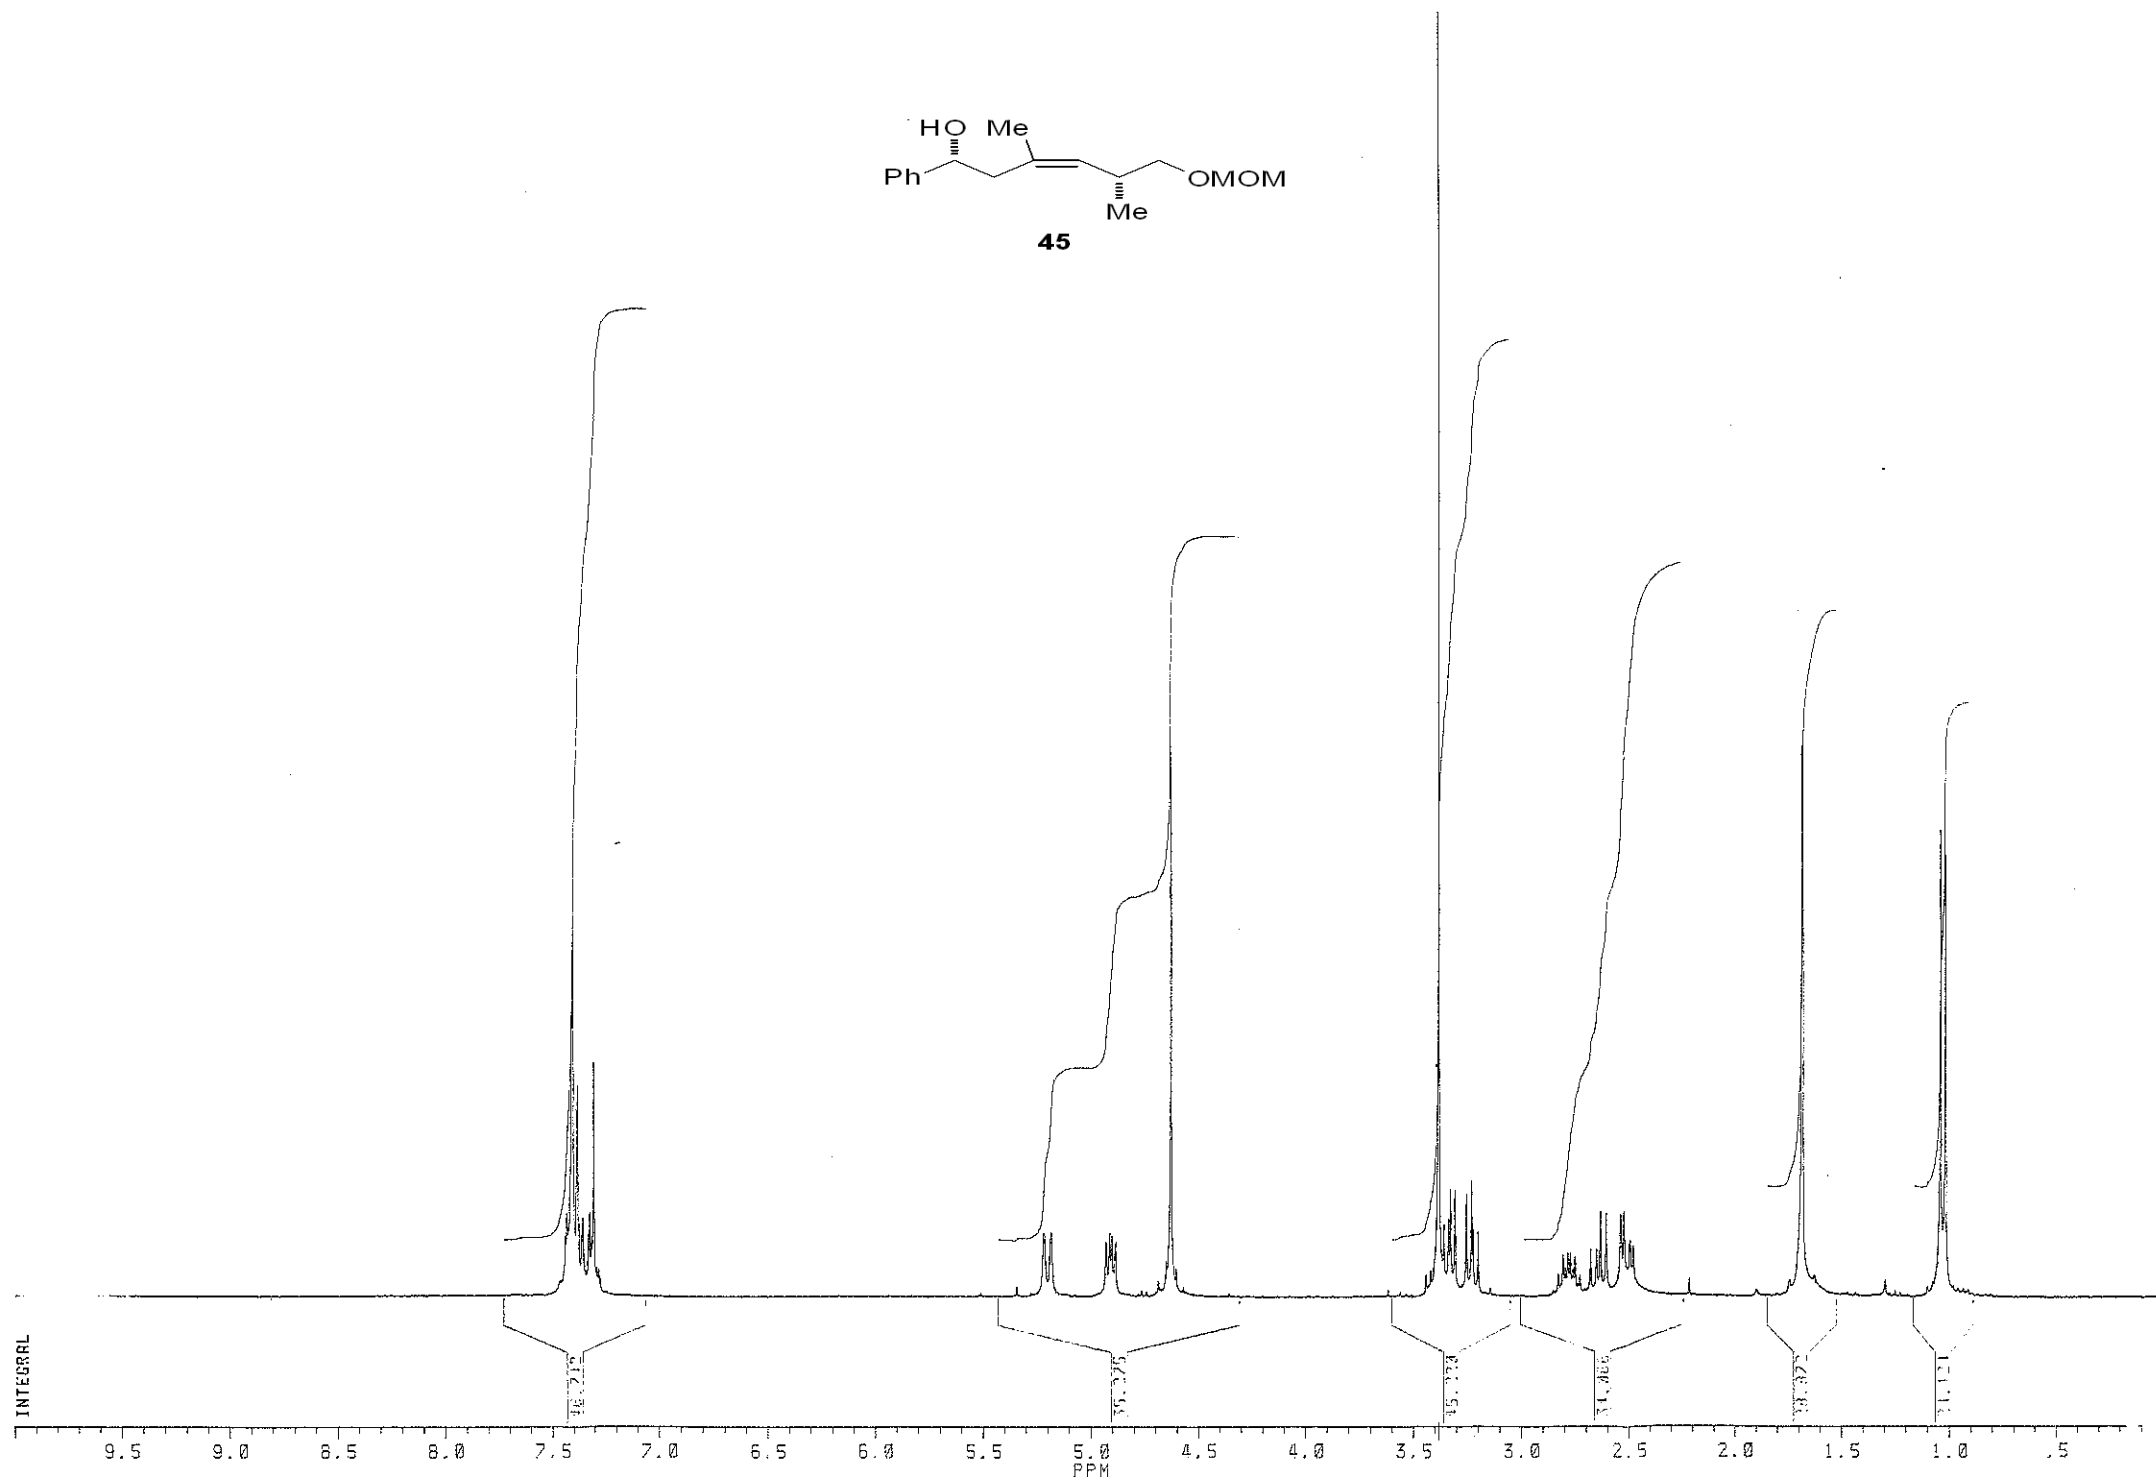

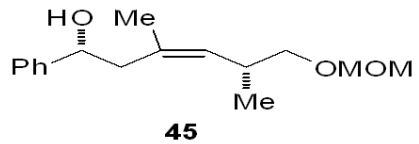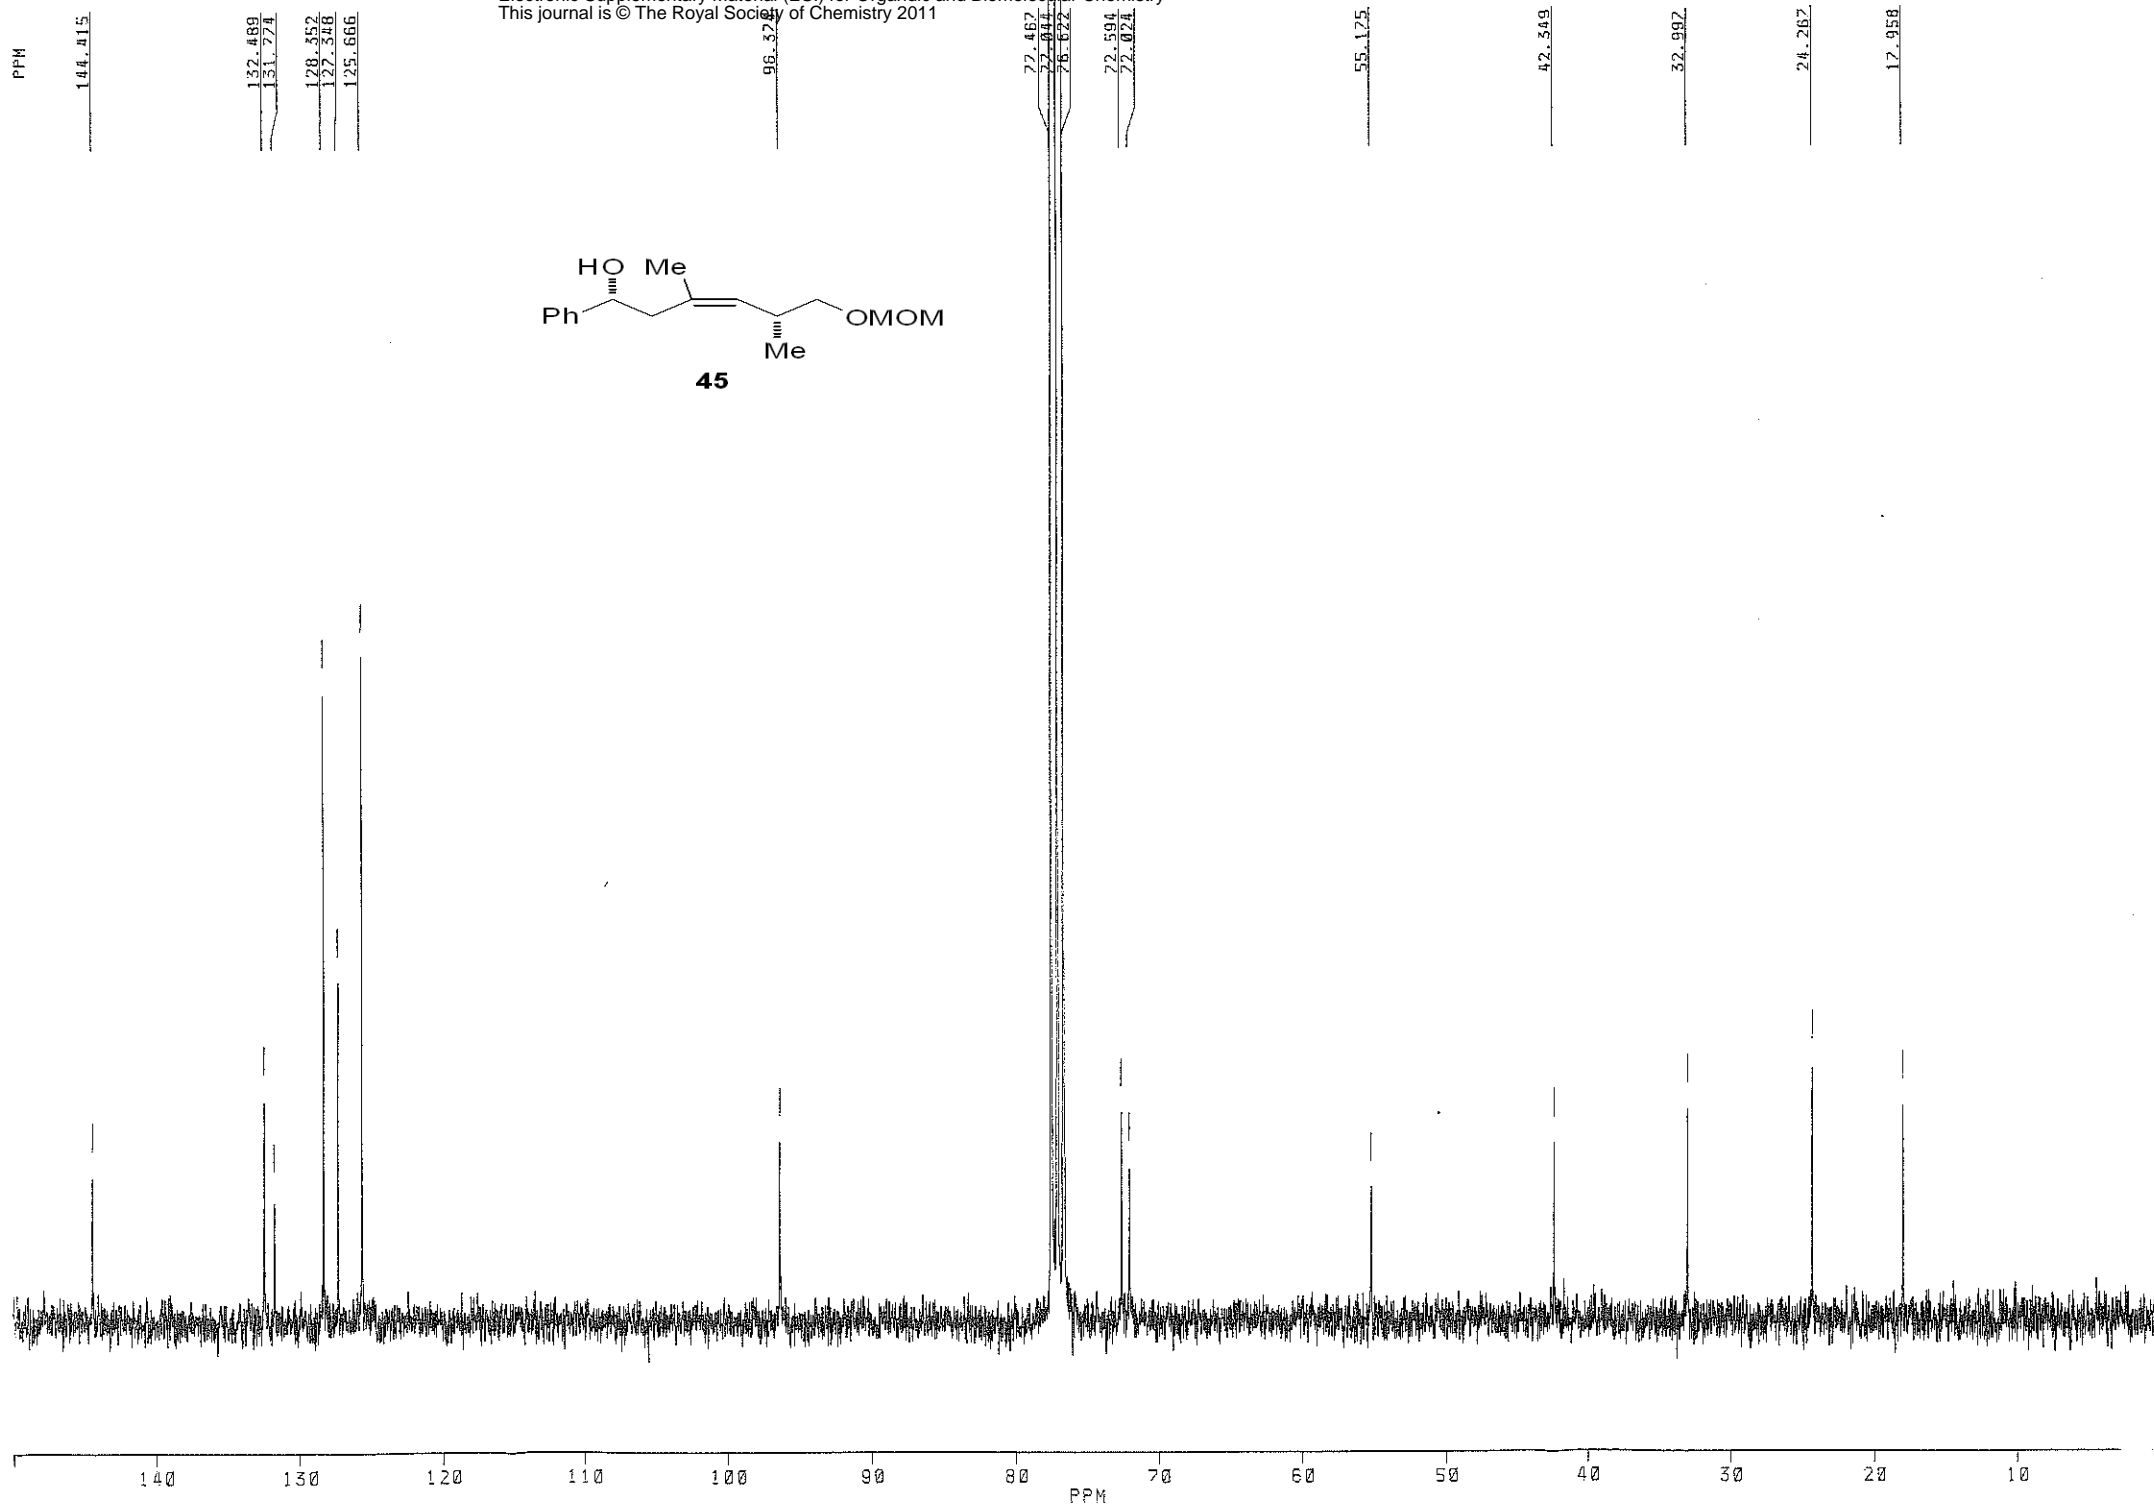



Ph

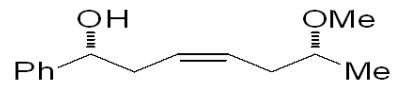

**78**

INTEGRAL

9.5 9.0 8.5 8.0 7.5 7.0 6.5 6.0 5.5 5.0 4.5 4.0 3.5 3.0 2.5 2.0 1.5 1.0 0.5

PPM

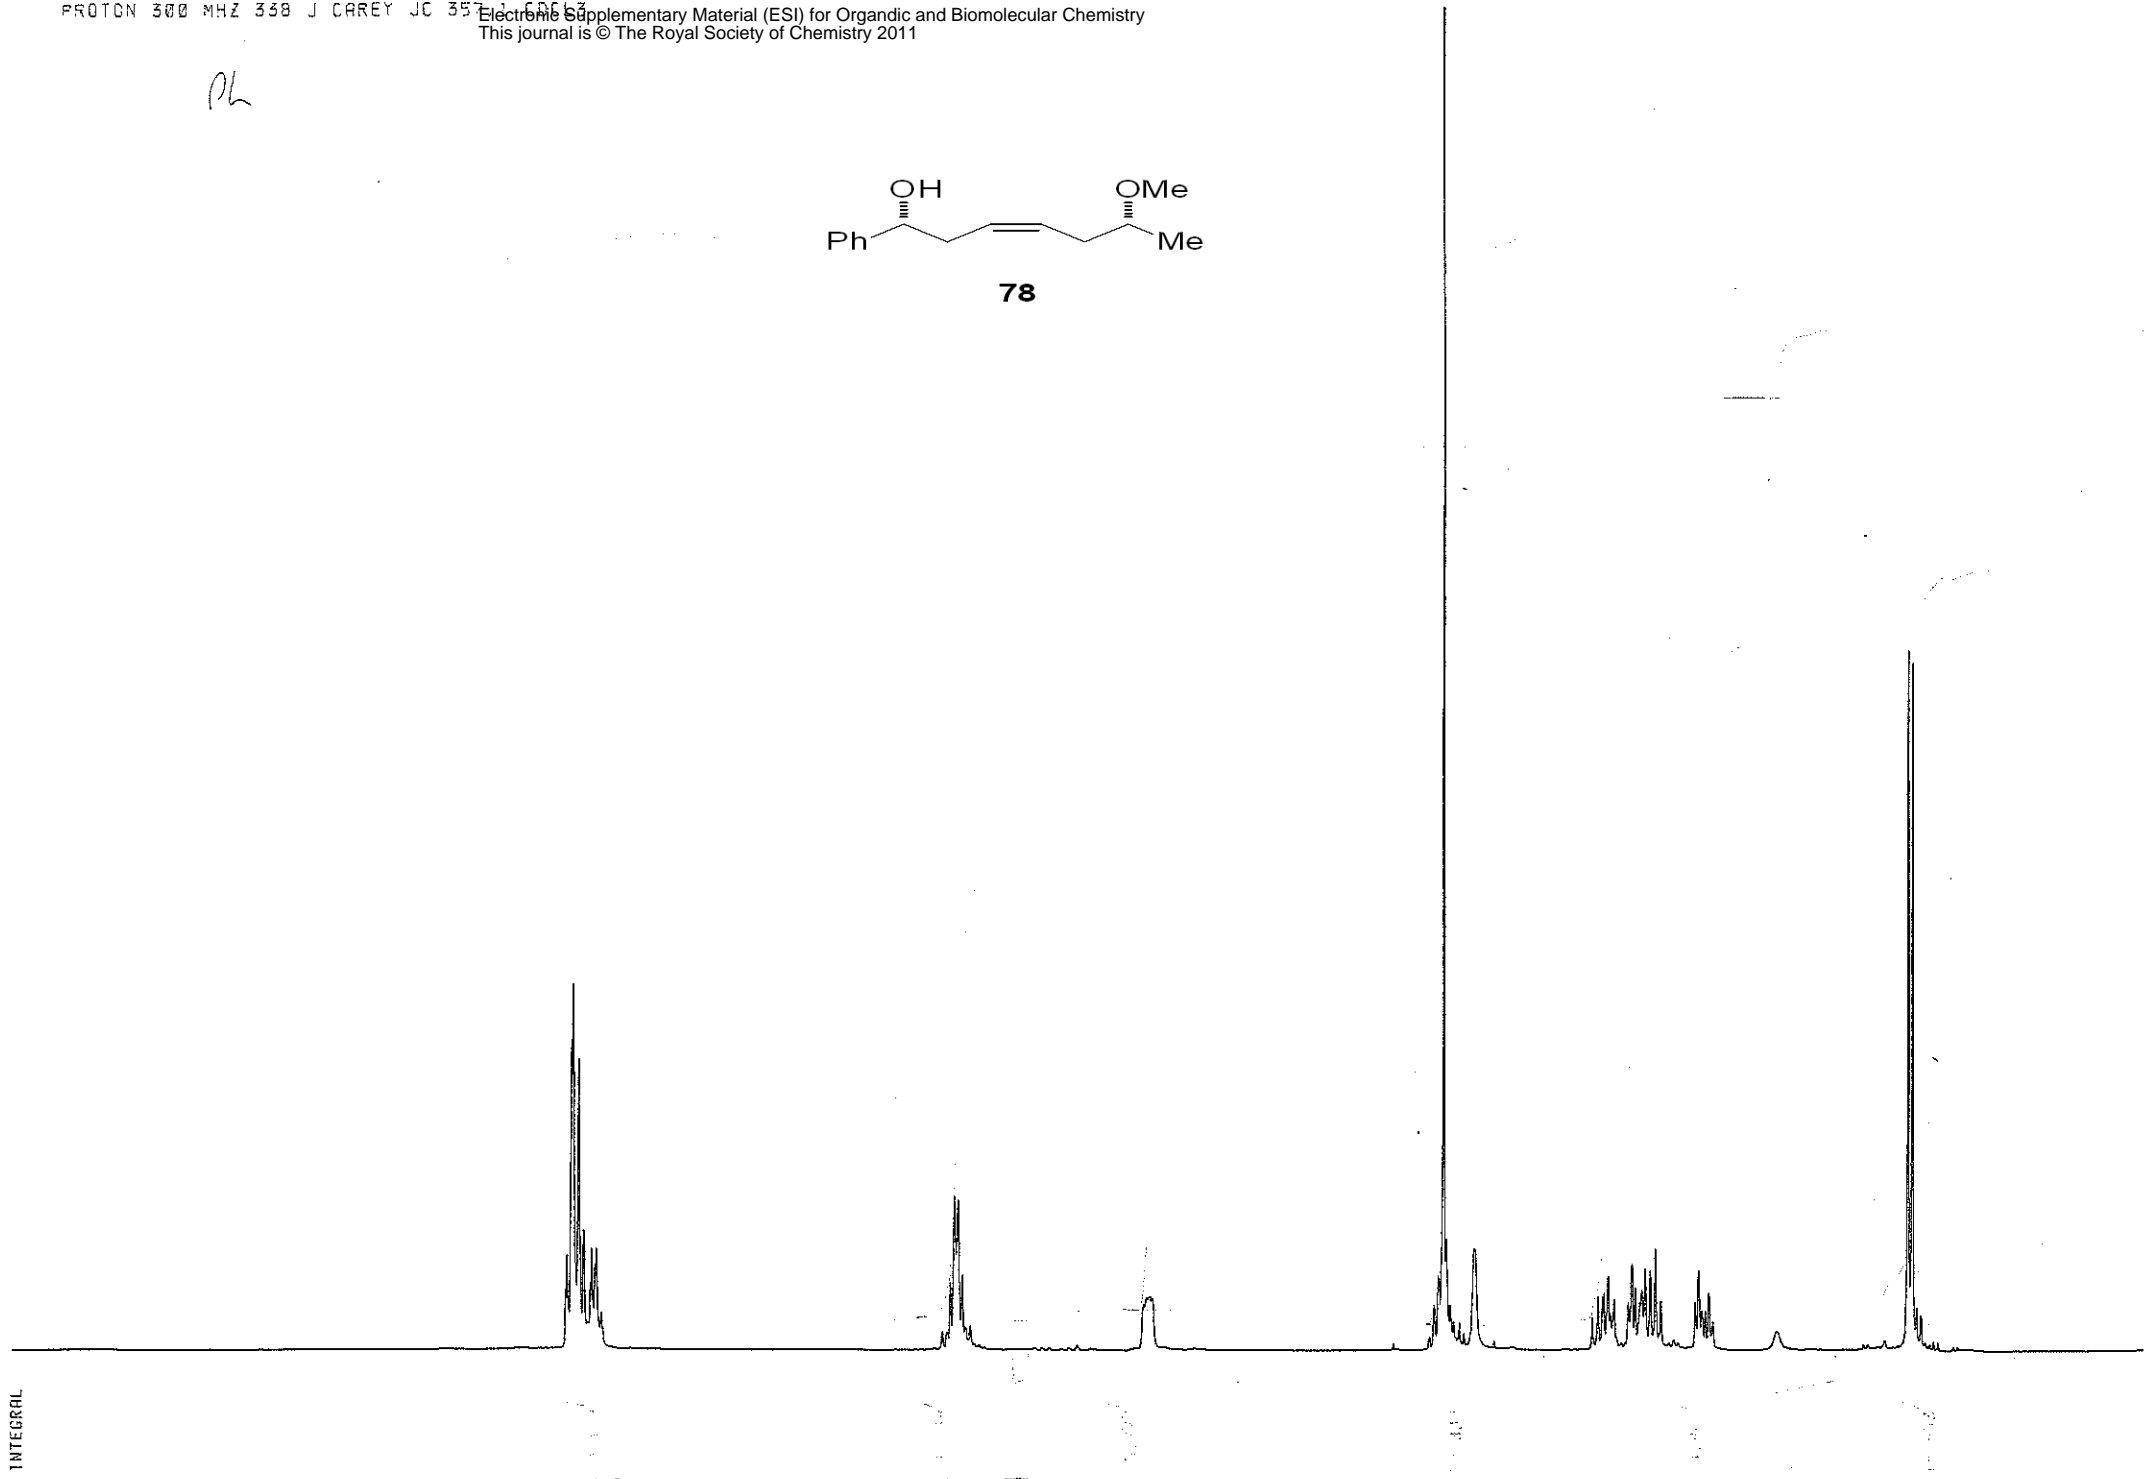

PPM

144.578

129.323  
128.301  
128.016  
127.814  
126.816  
125.808

77.472  
77.269  
77.066  
76.863  
76.660  
76.457  
76.254  
76.051

56.074

37.268

34.488  
33.972

18.893  
18.693

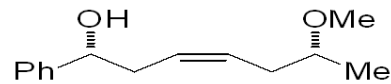

78

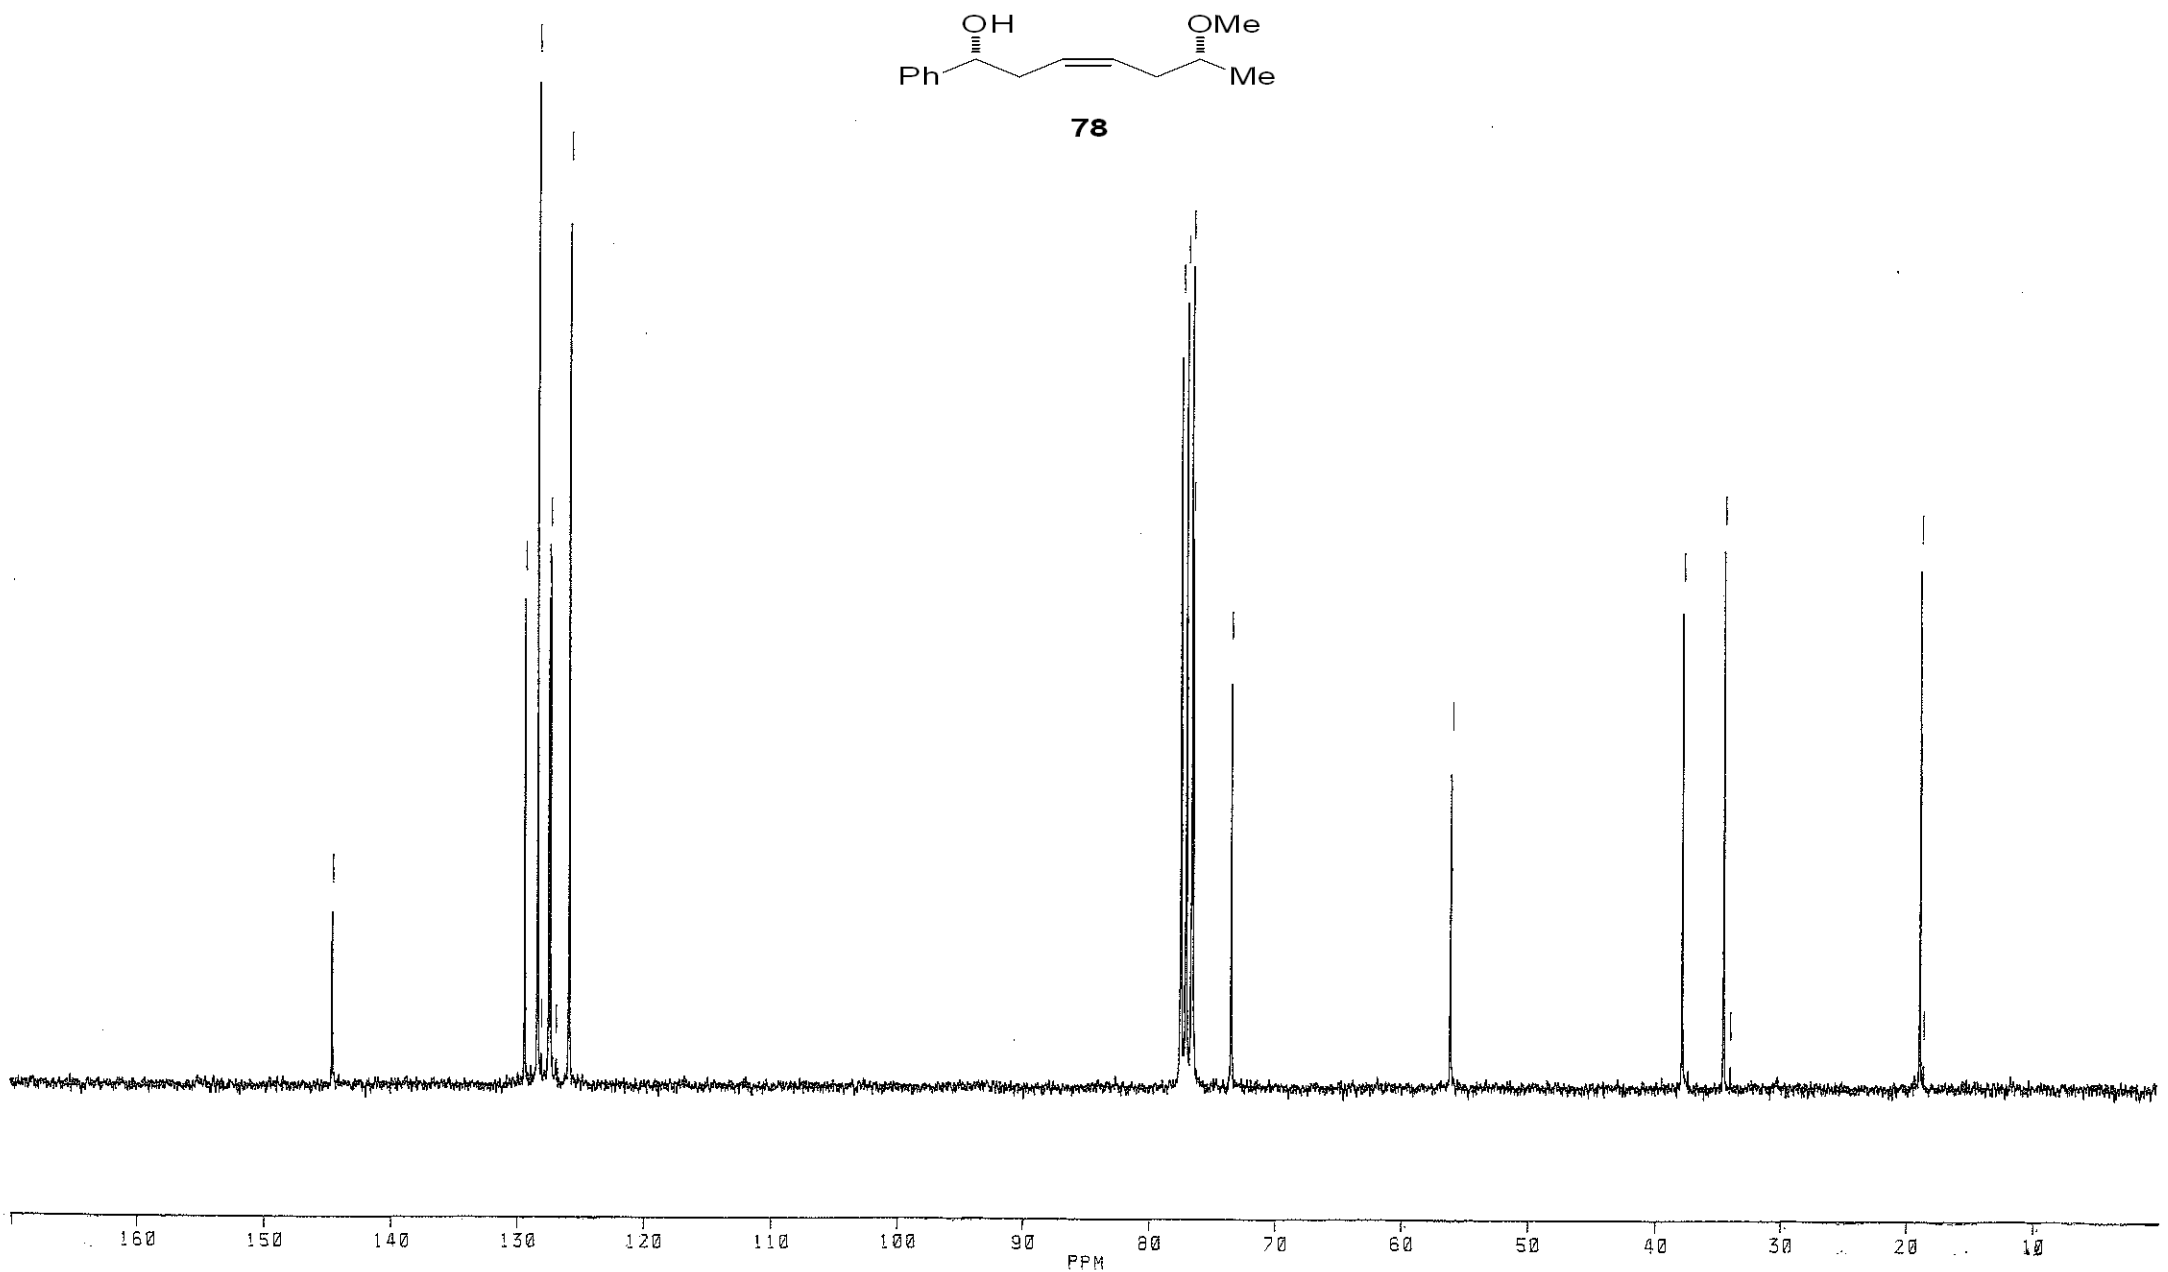

160 150 140 130 120 110 100 90 80 70 60 50 40 30 20 10

PPM

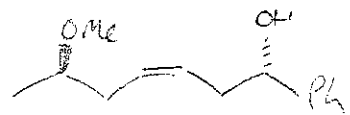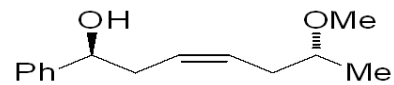

**81**

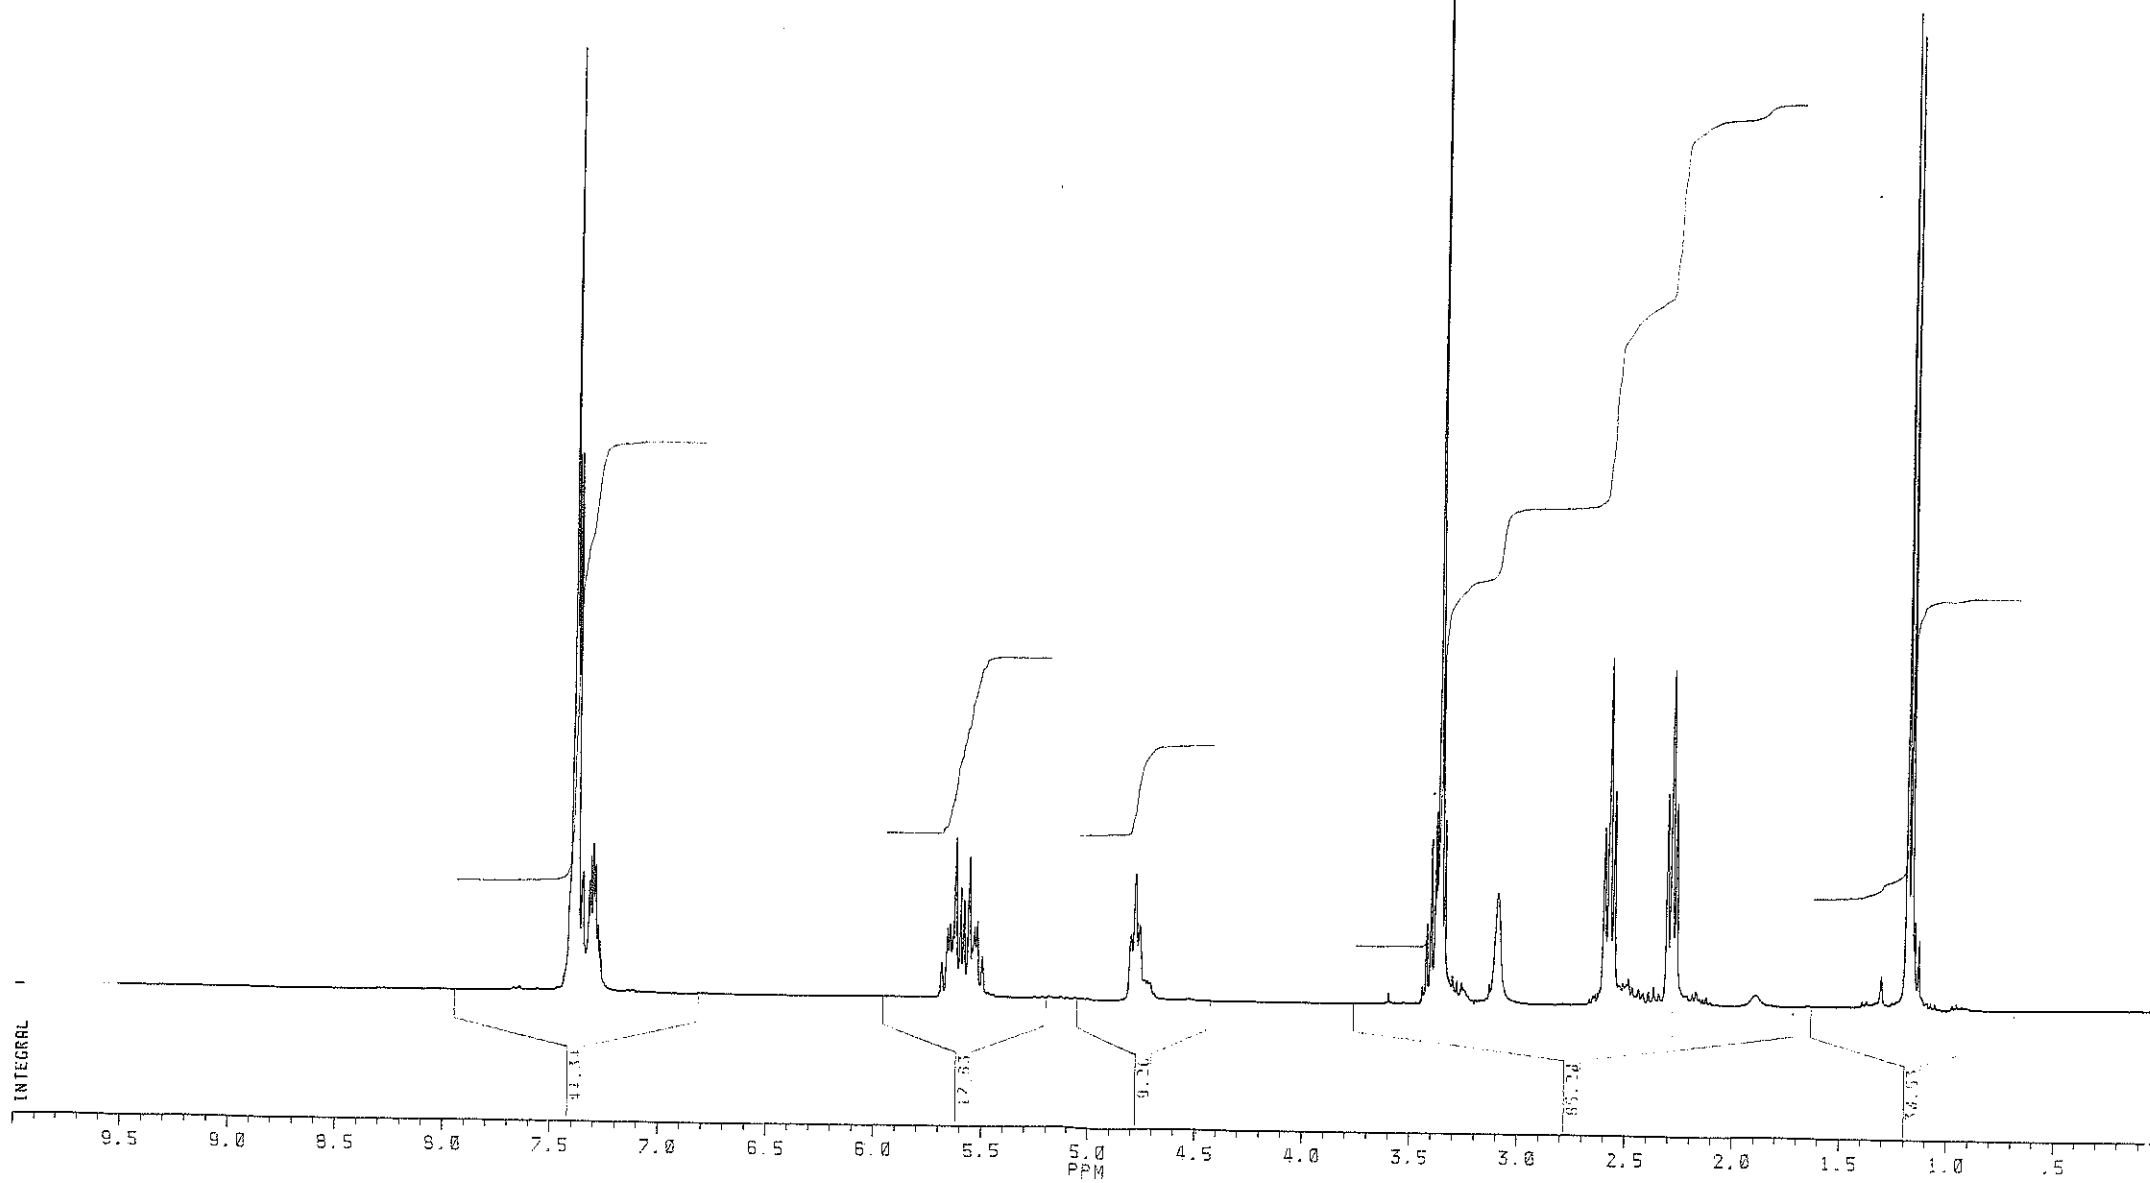

PPM

144.477

128.268  
128.268  
127.415  
127.261  
127.251  
127.153  
125.897  
125.77277.500  
77.500  
77.500  
76.655  
76.549  
76.447  
75.468  
75.375

56.050

39.389  
37.256  
37.318  
34.470  
33.97018.895  
18.834  
18.616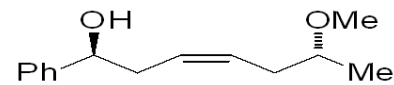**81**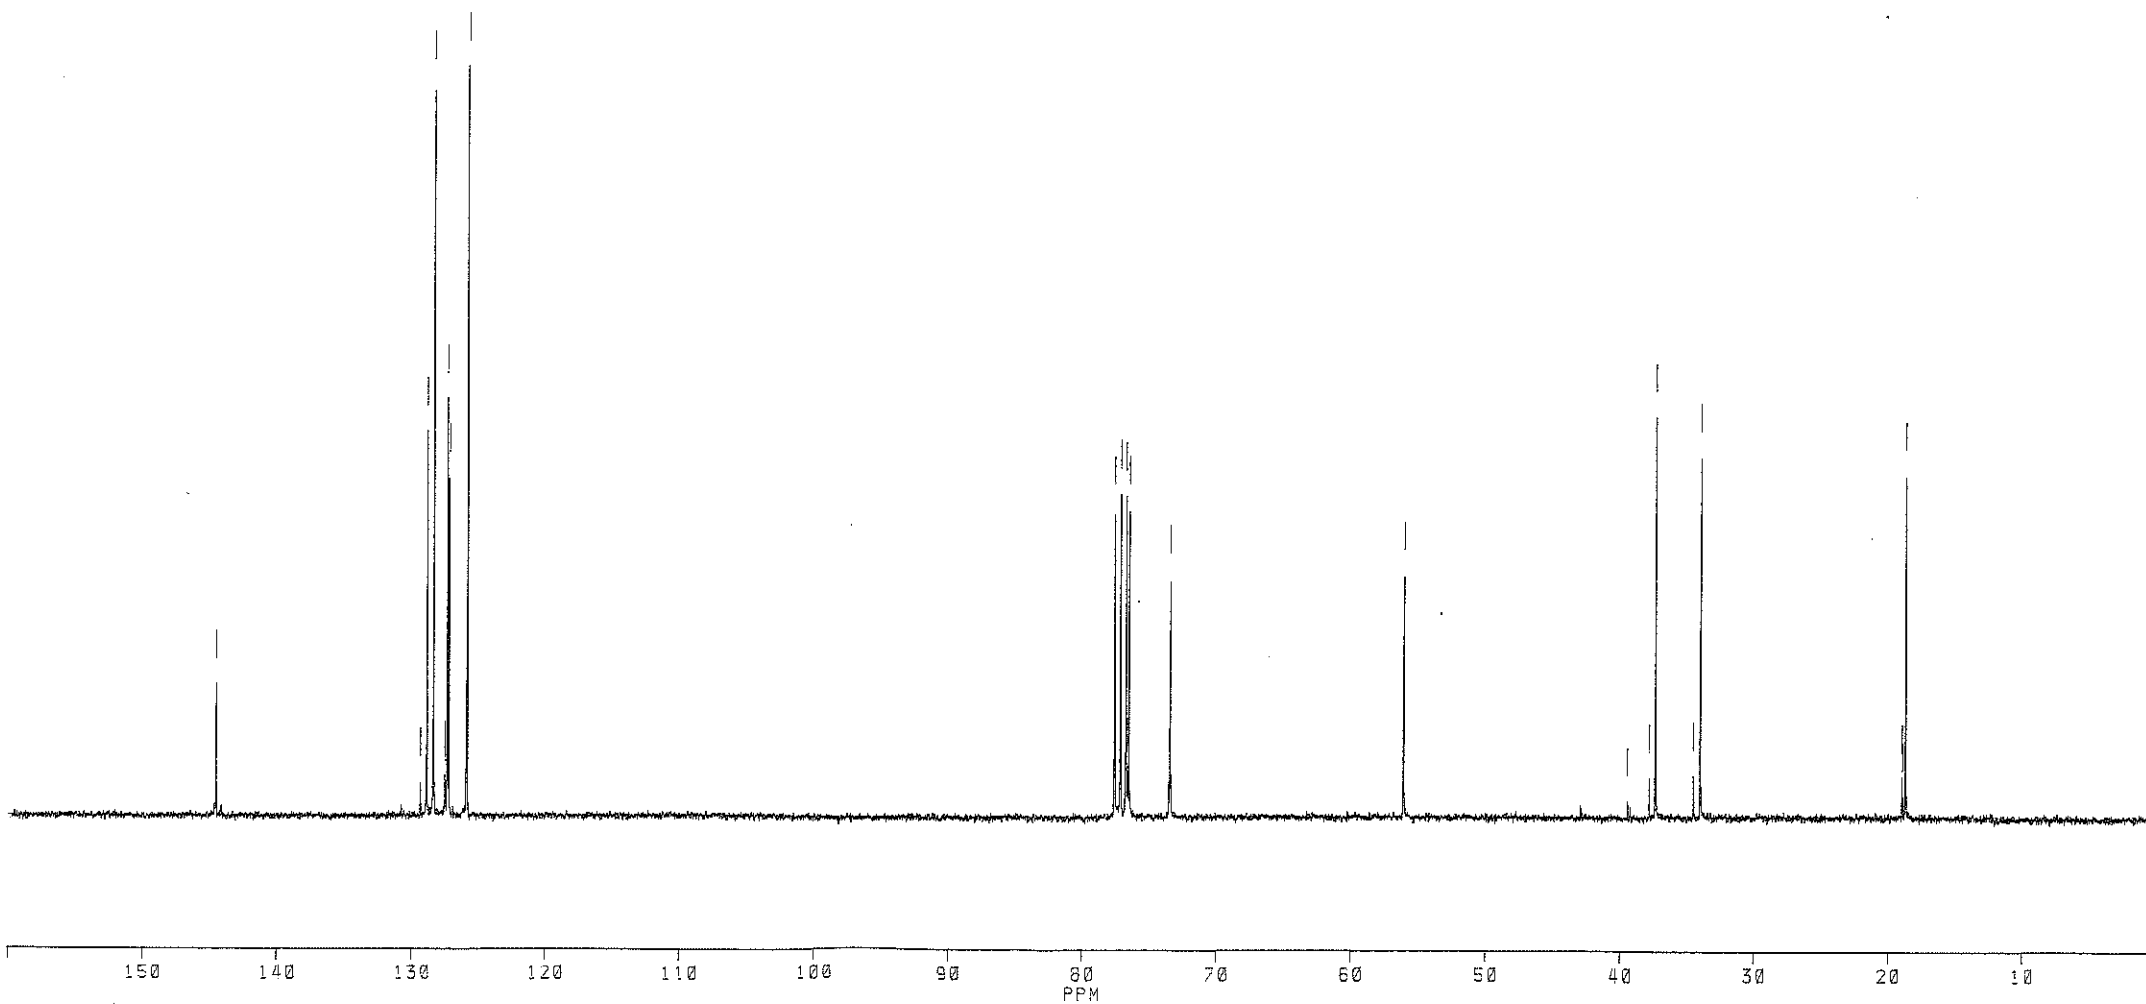

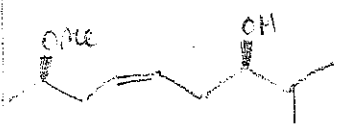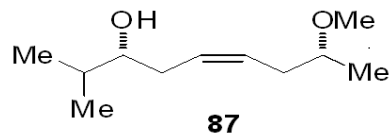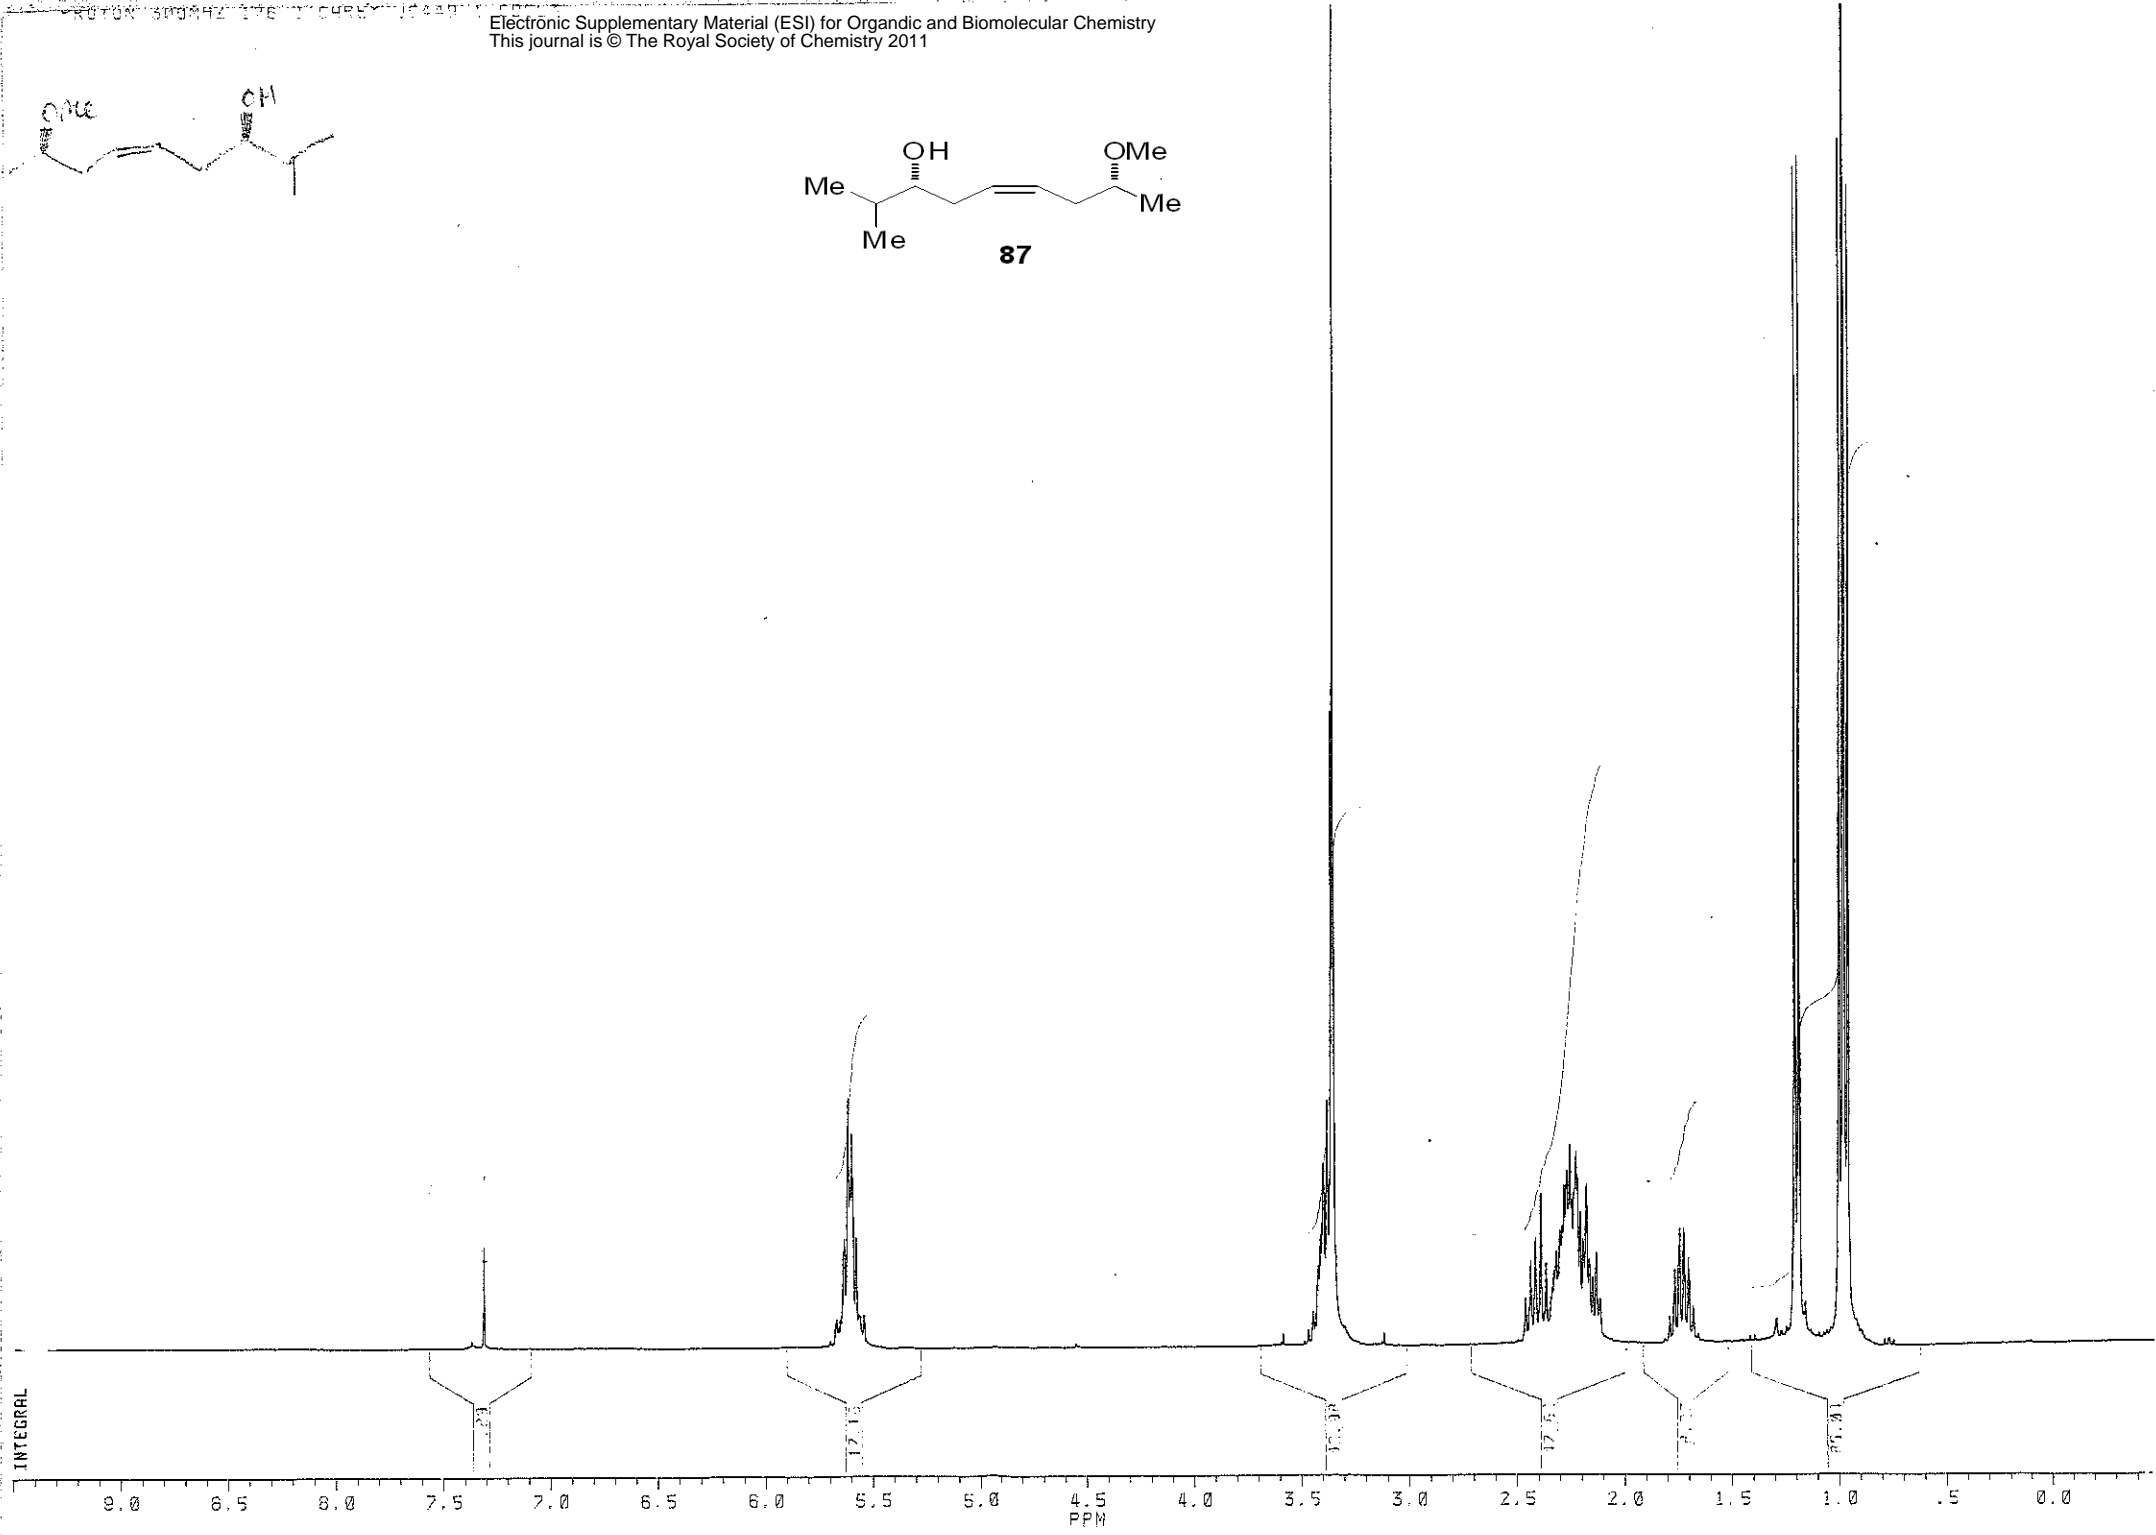

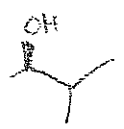

128.918  
128.575  
128.502  
128.206

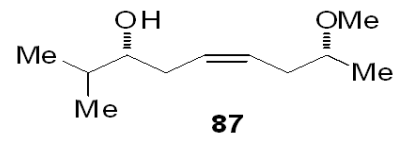

77.451  
77.028  
76.607  
76.496  
76.039  
75.863

56.134  
56.065

34.569  
33.687  
33.467  
33.291  
32.173

18.941  
18.774  
18.653  
18.500  
17.779

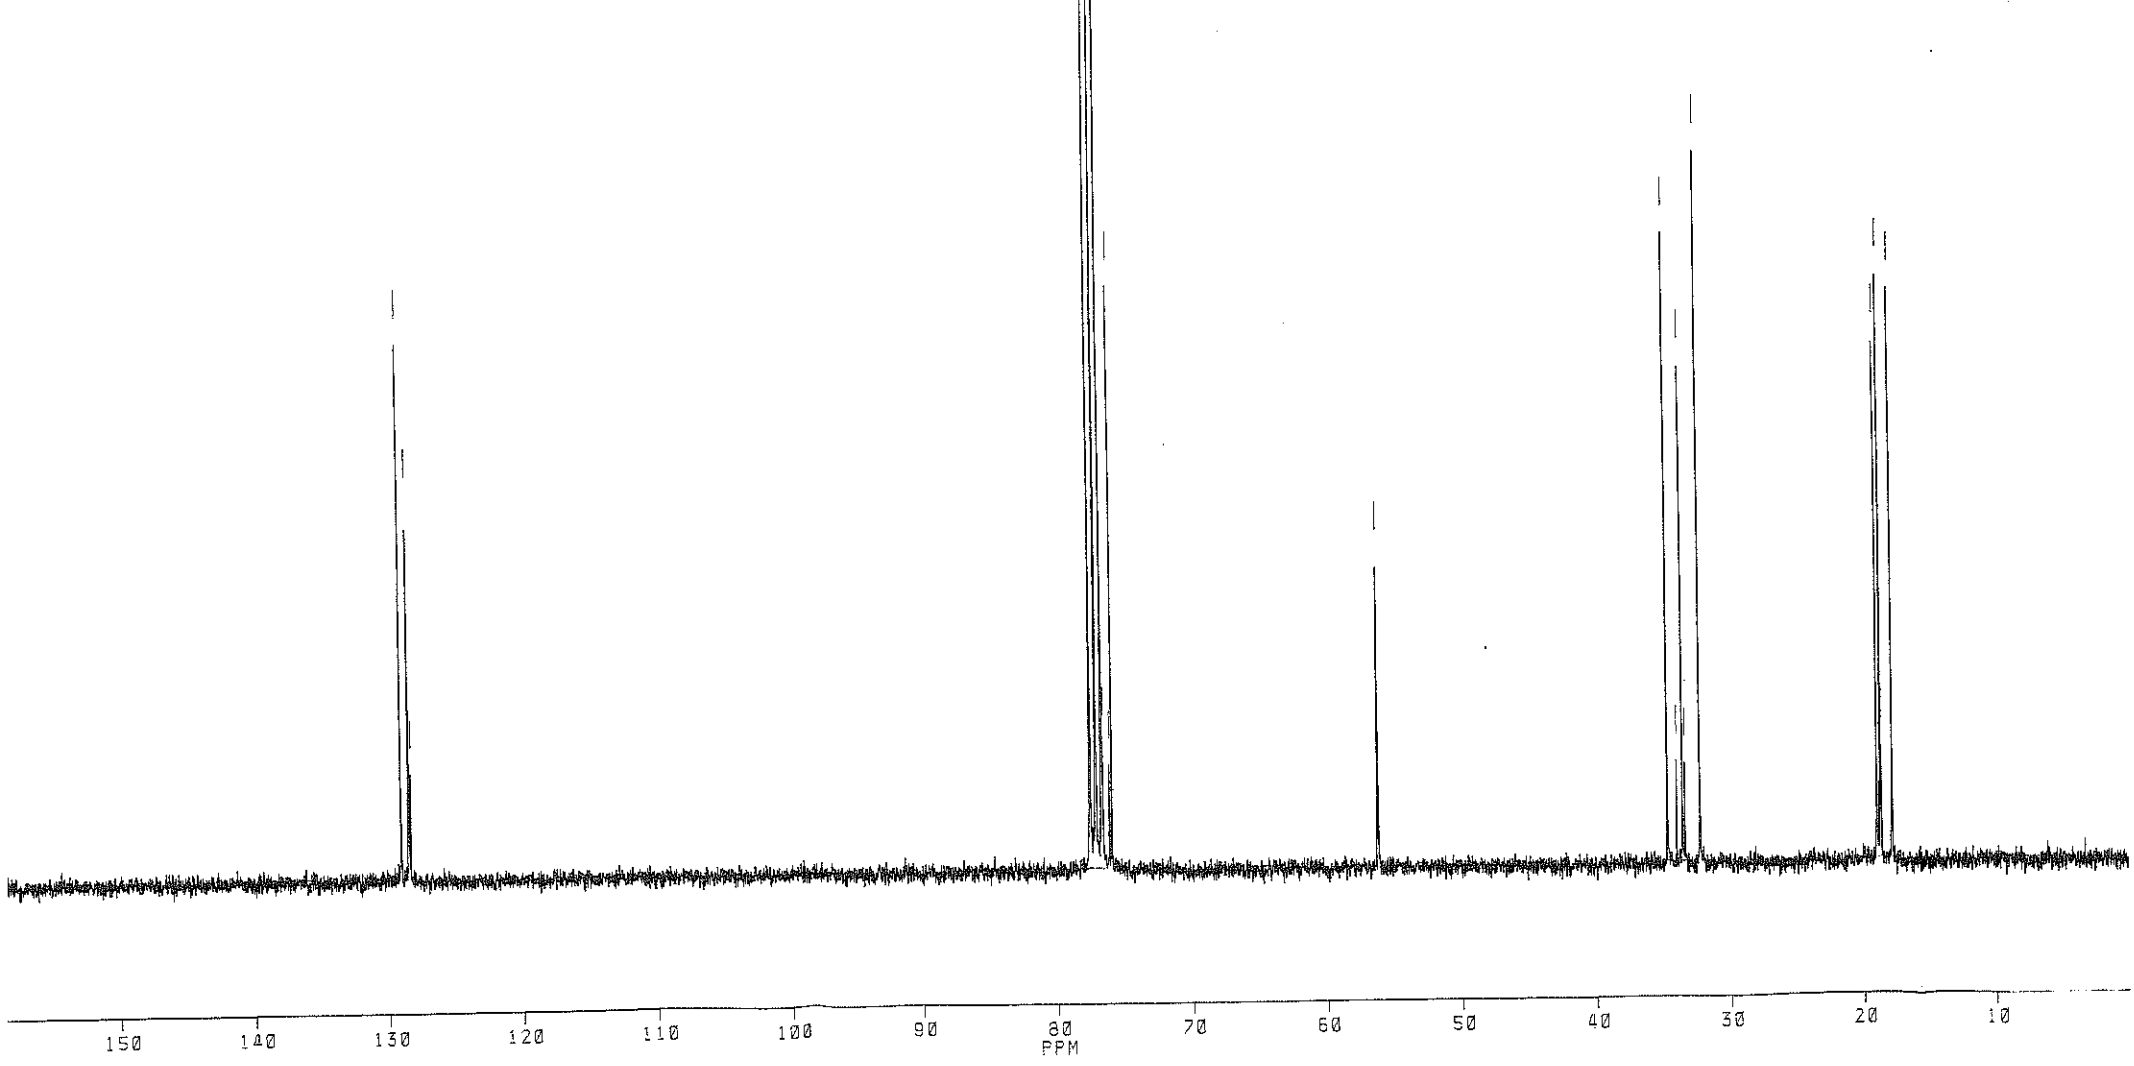

CGI  
DATI  
  
SF  
O1  
SI  
TD  
SW  
  
PW  
RD  
AQ  
RG  
NS  
  
O2  
DP  
  
LB  
CY  
SR

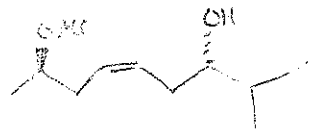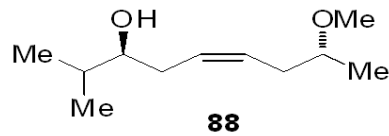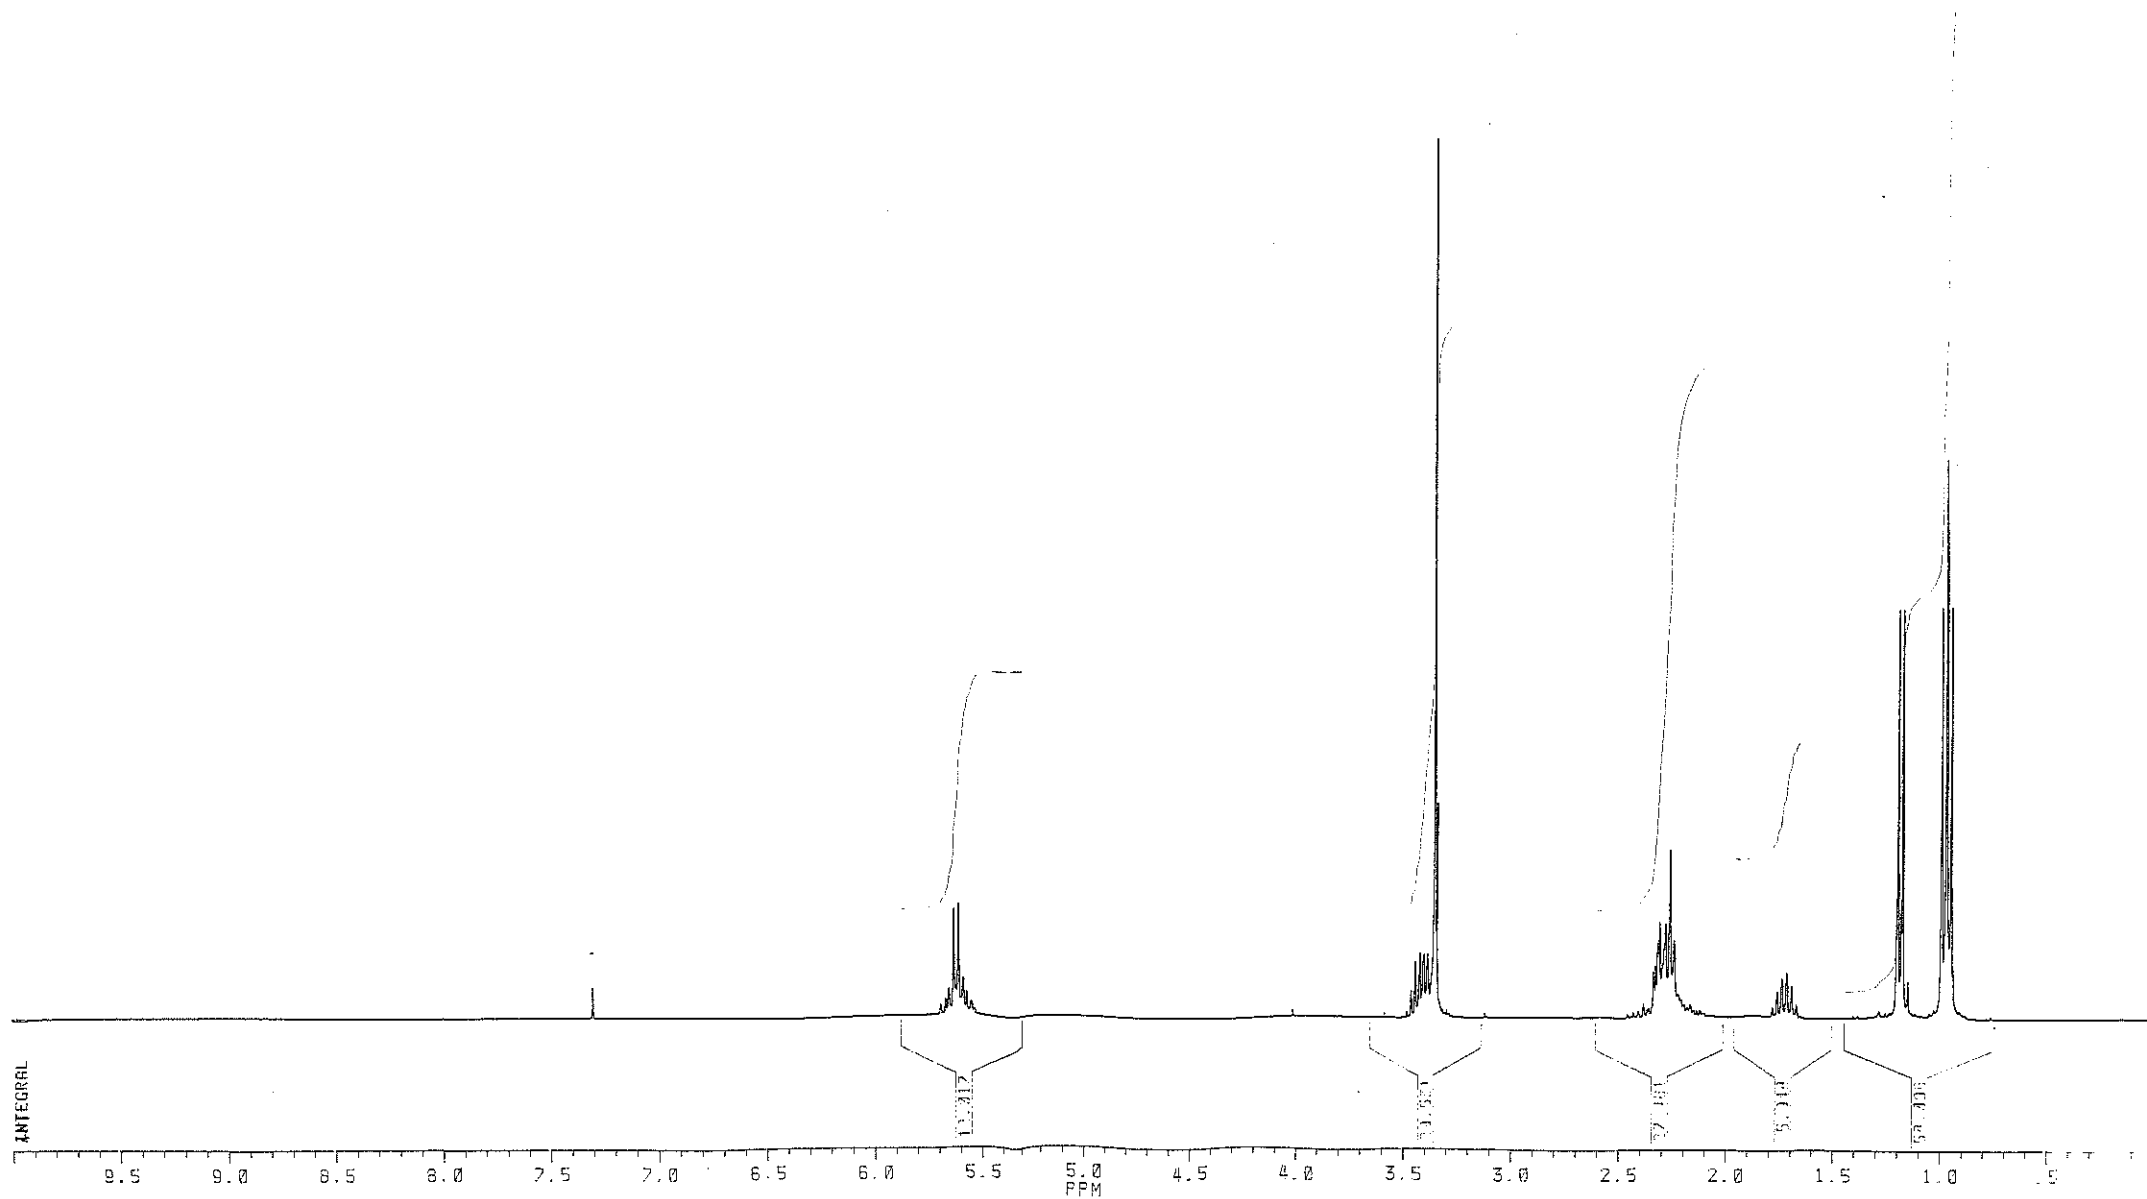

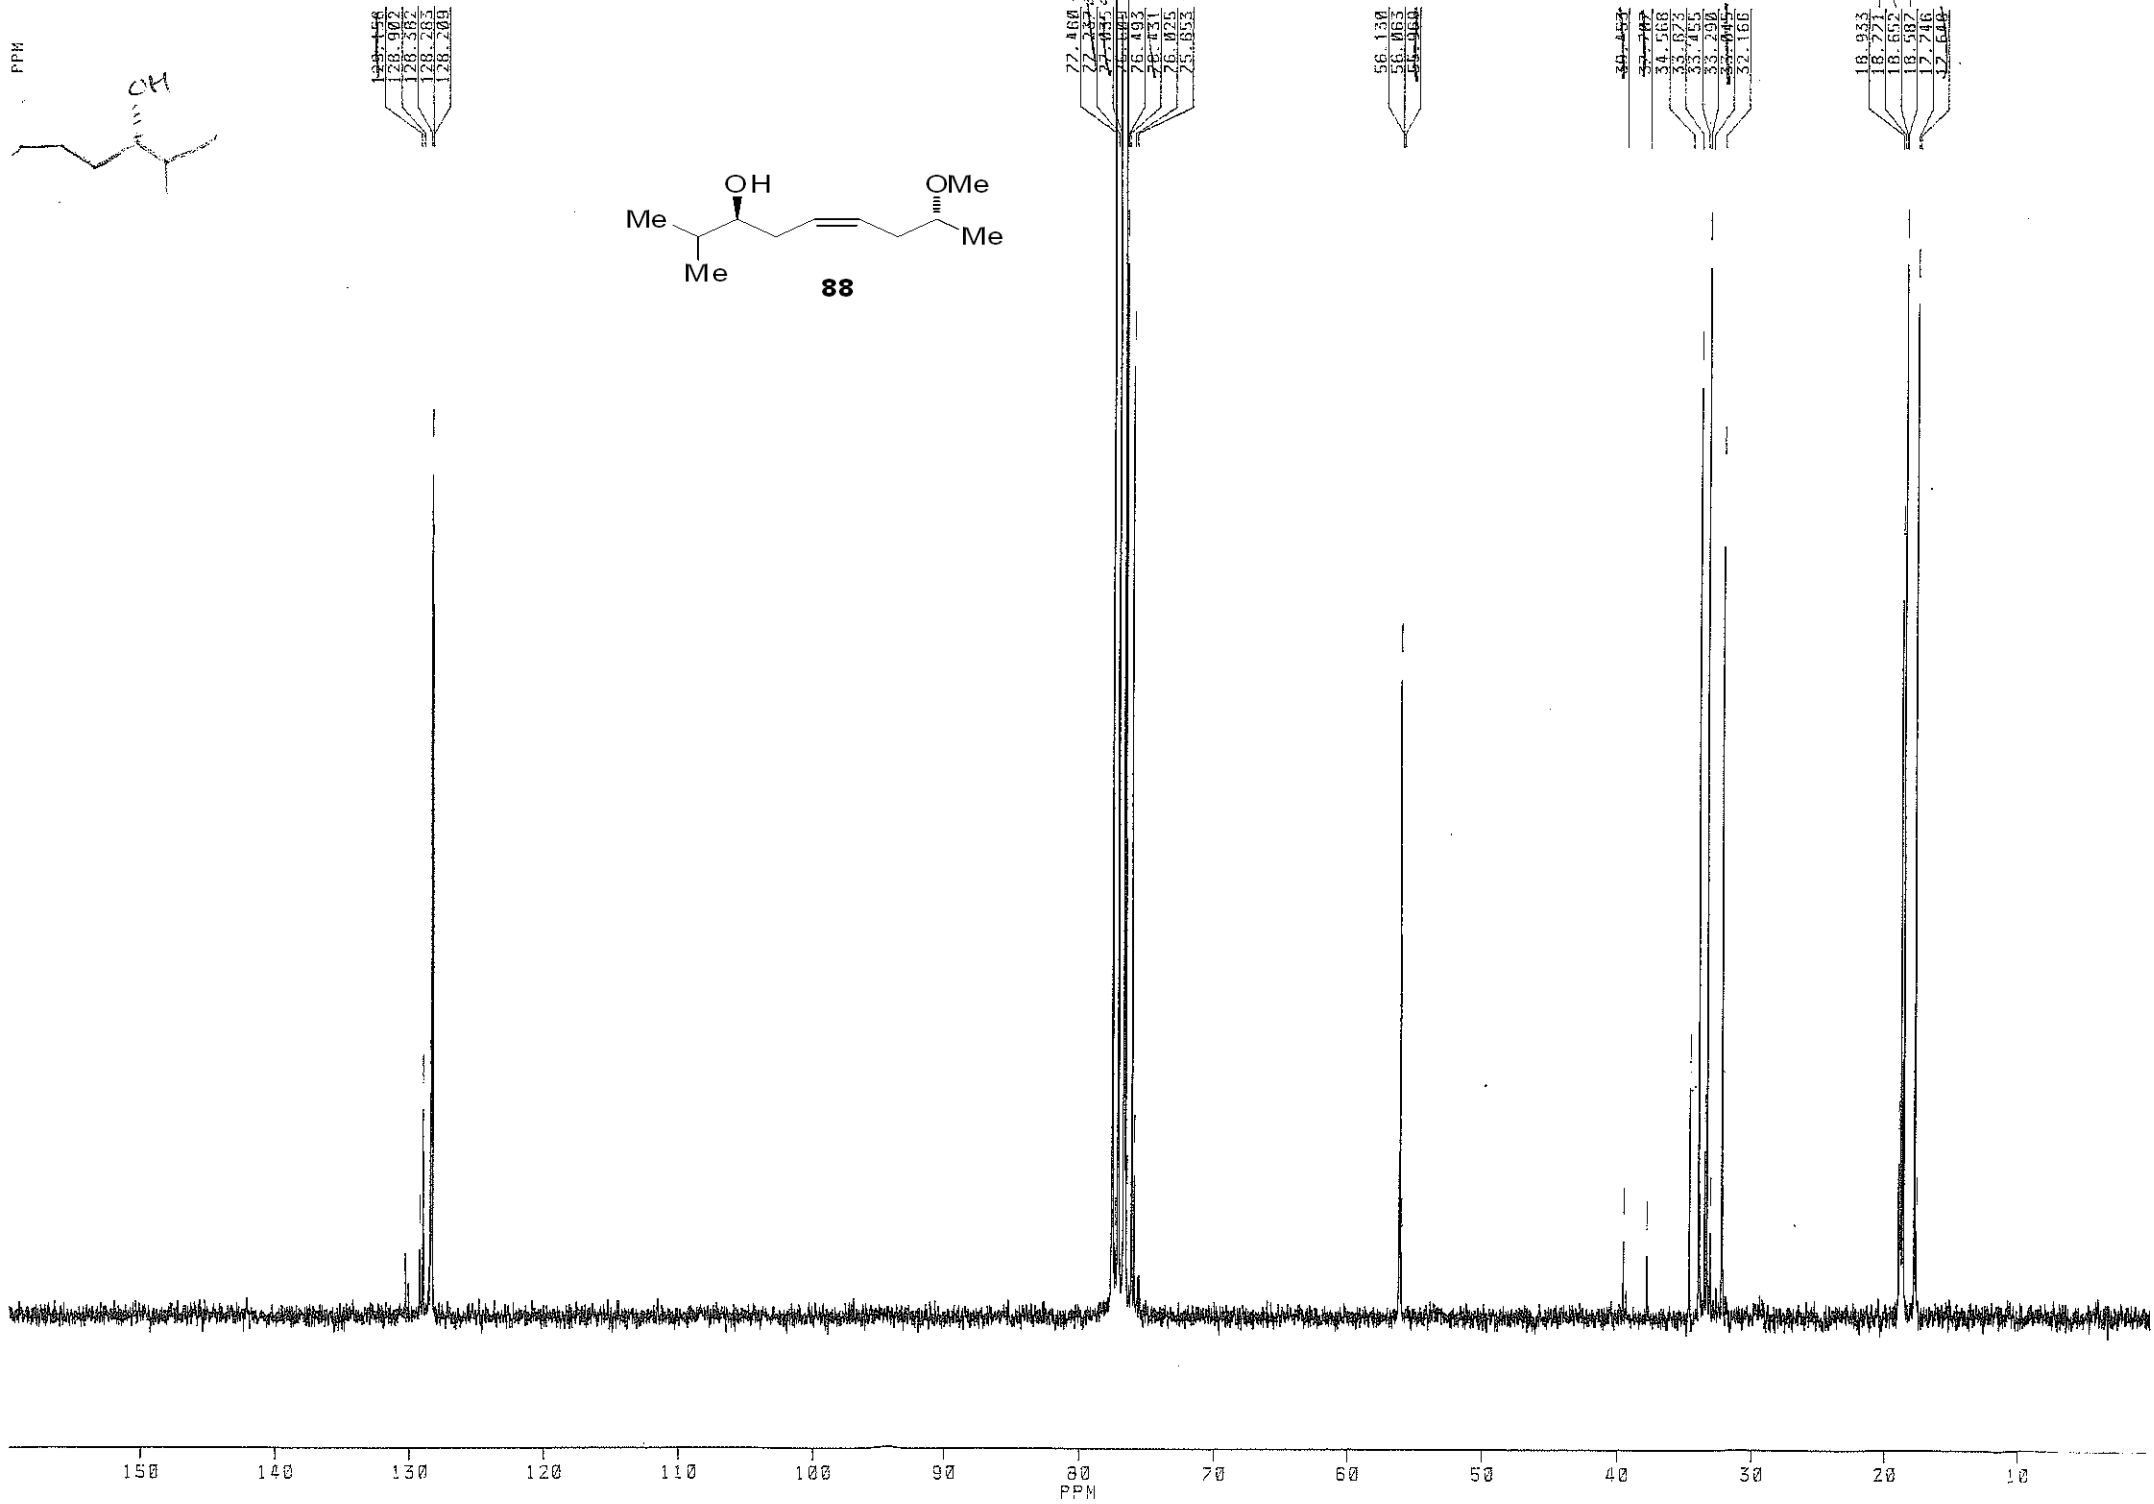



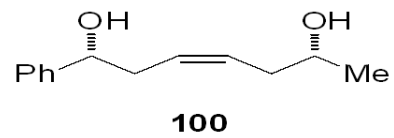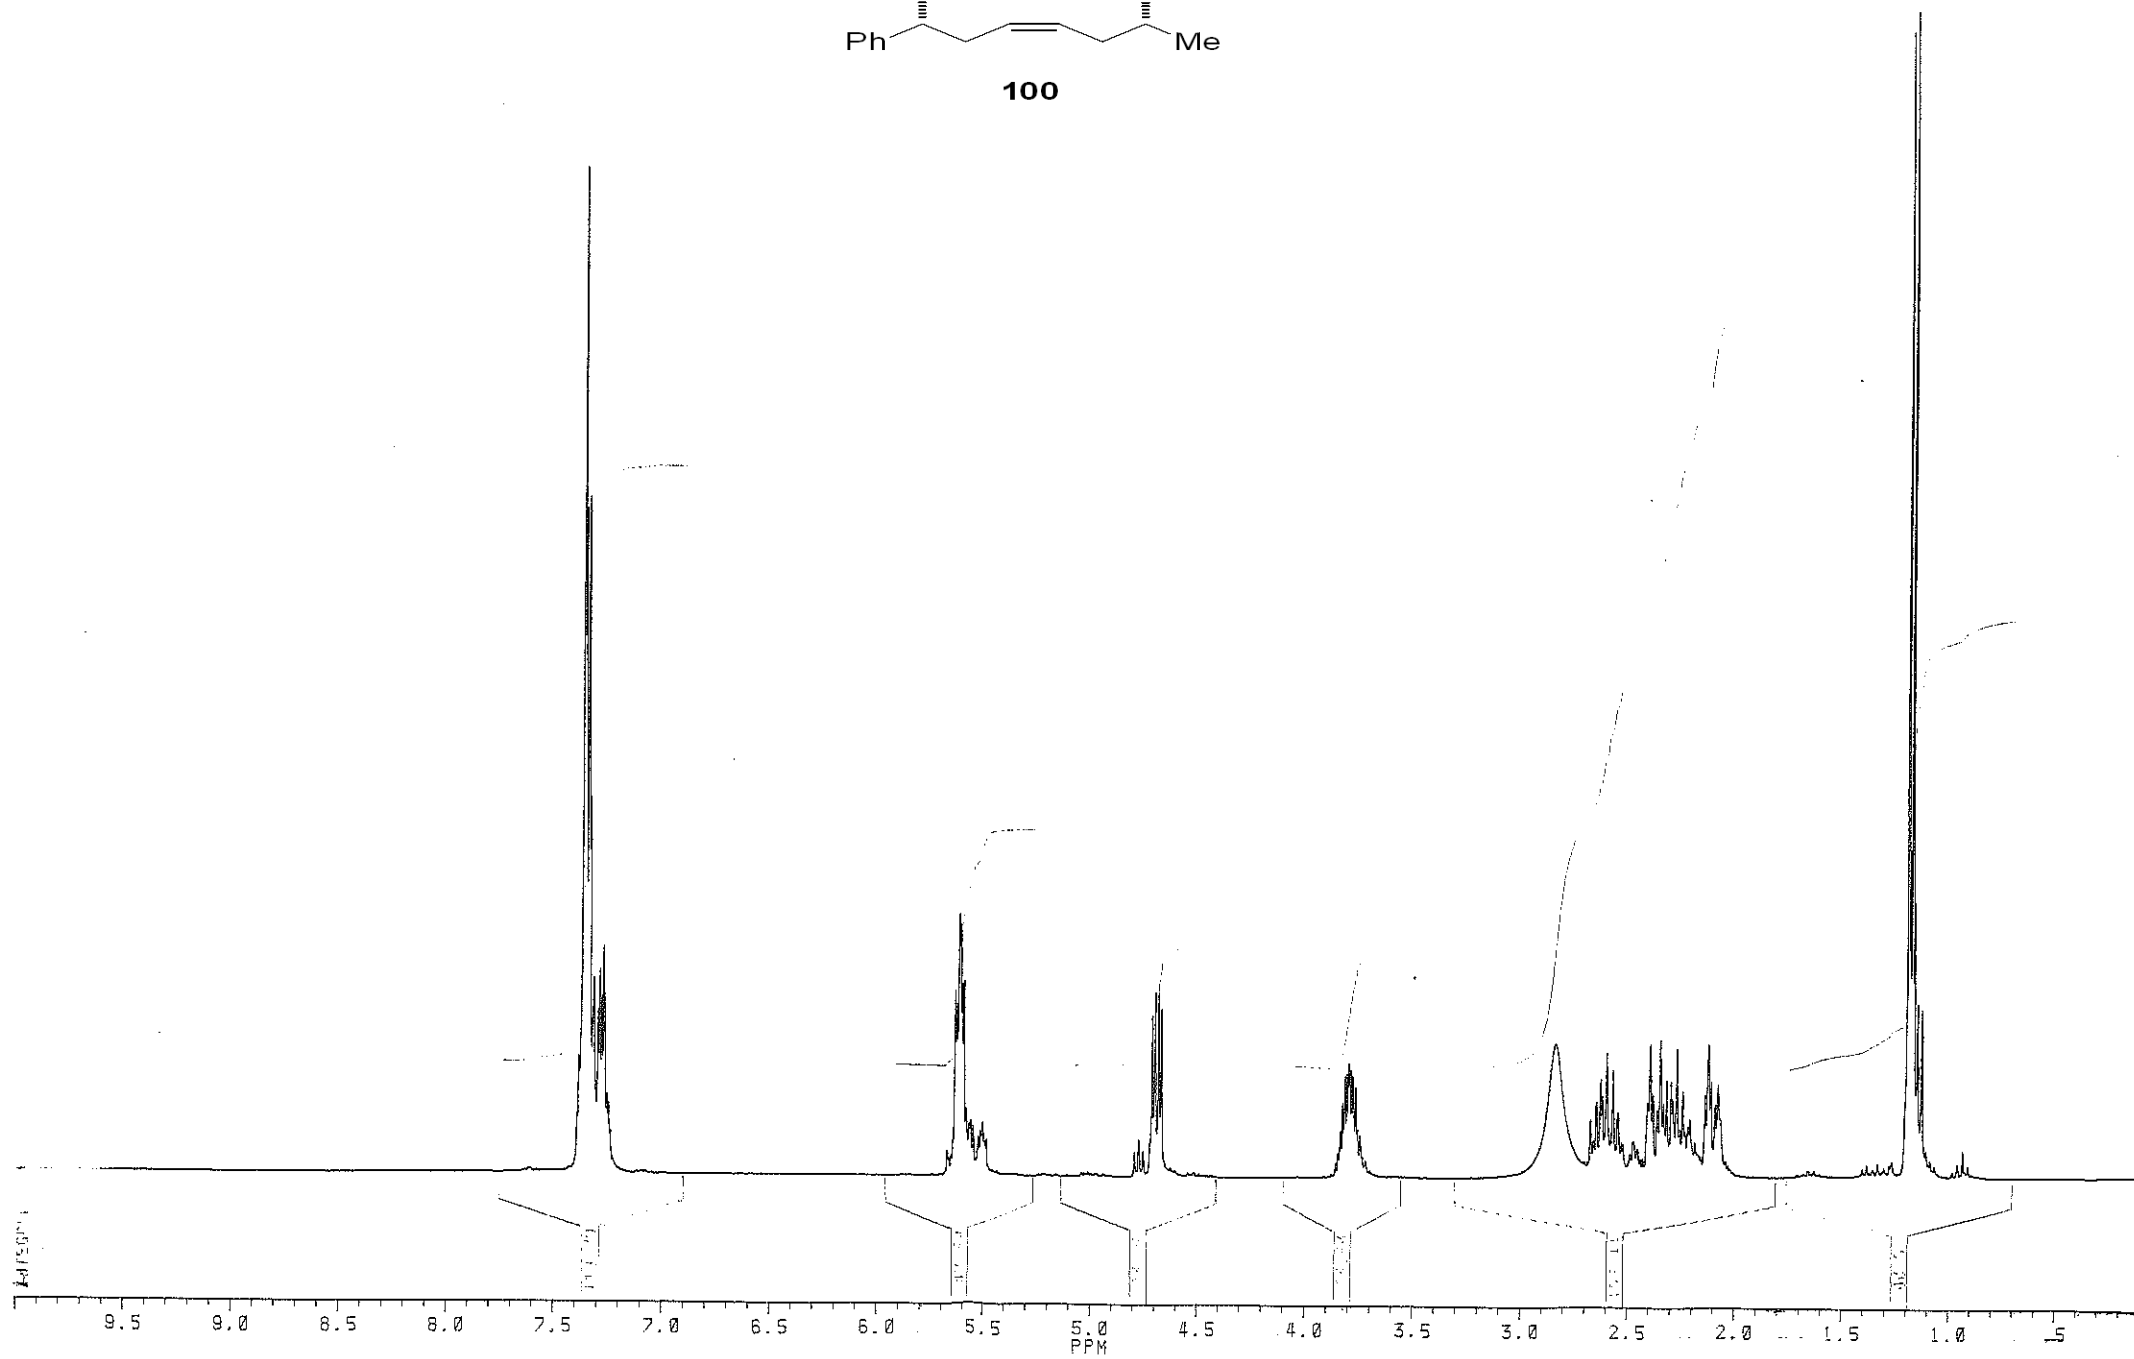

PPM

144.462  
144.163  
129.127  
128.647  
128.613  
128.580  
127.882  
127.849  
127.802  
125.791

77.467  
77.447  
76.622  
73.506  
73.397  
67.420  
67.316

37.494  
36.976  
36.669

23.327  
22.878

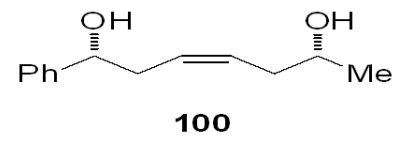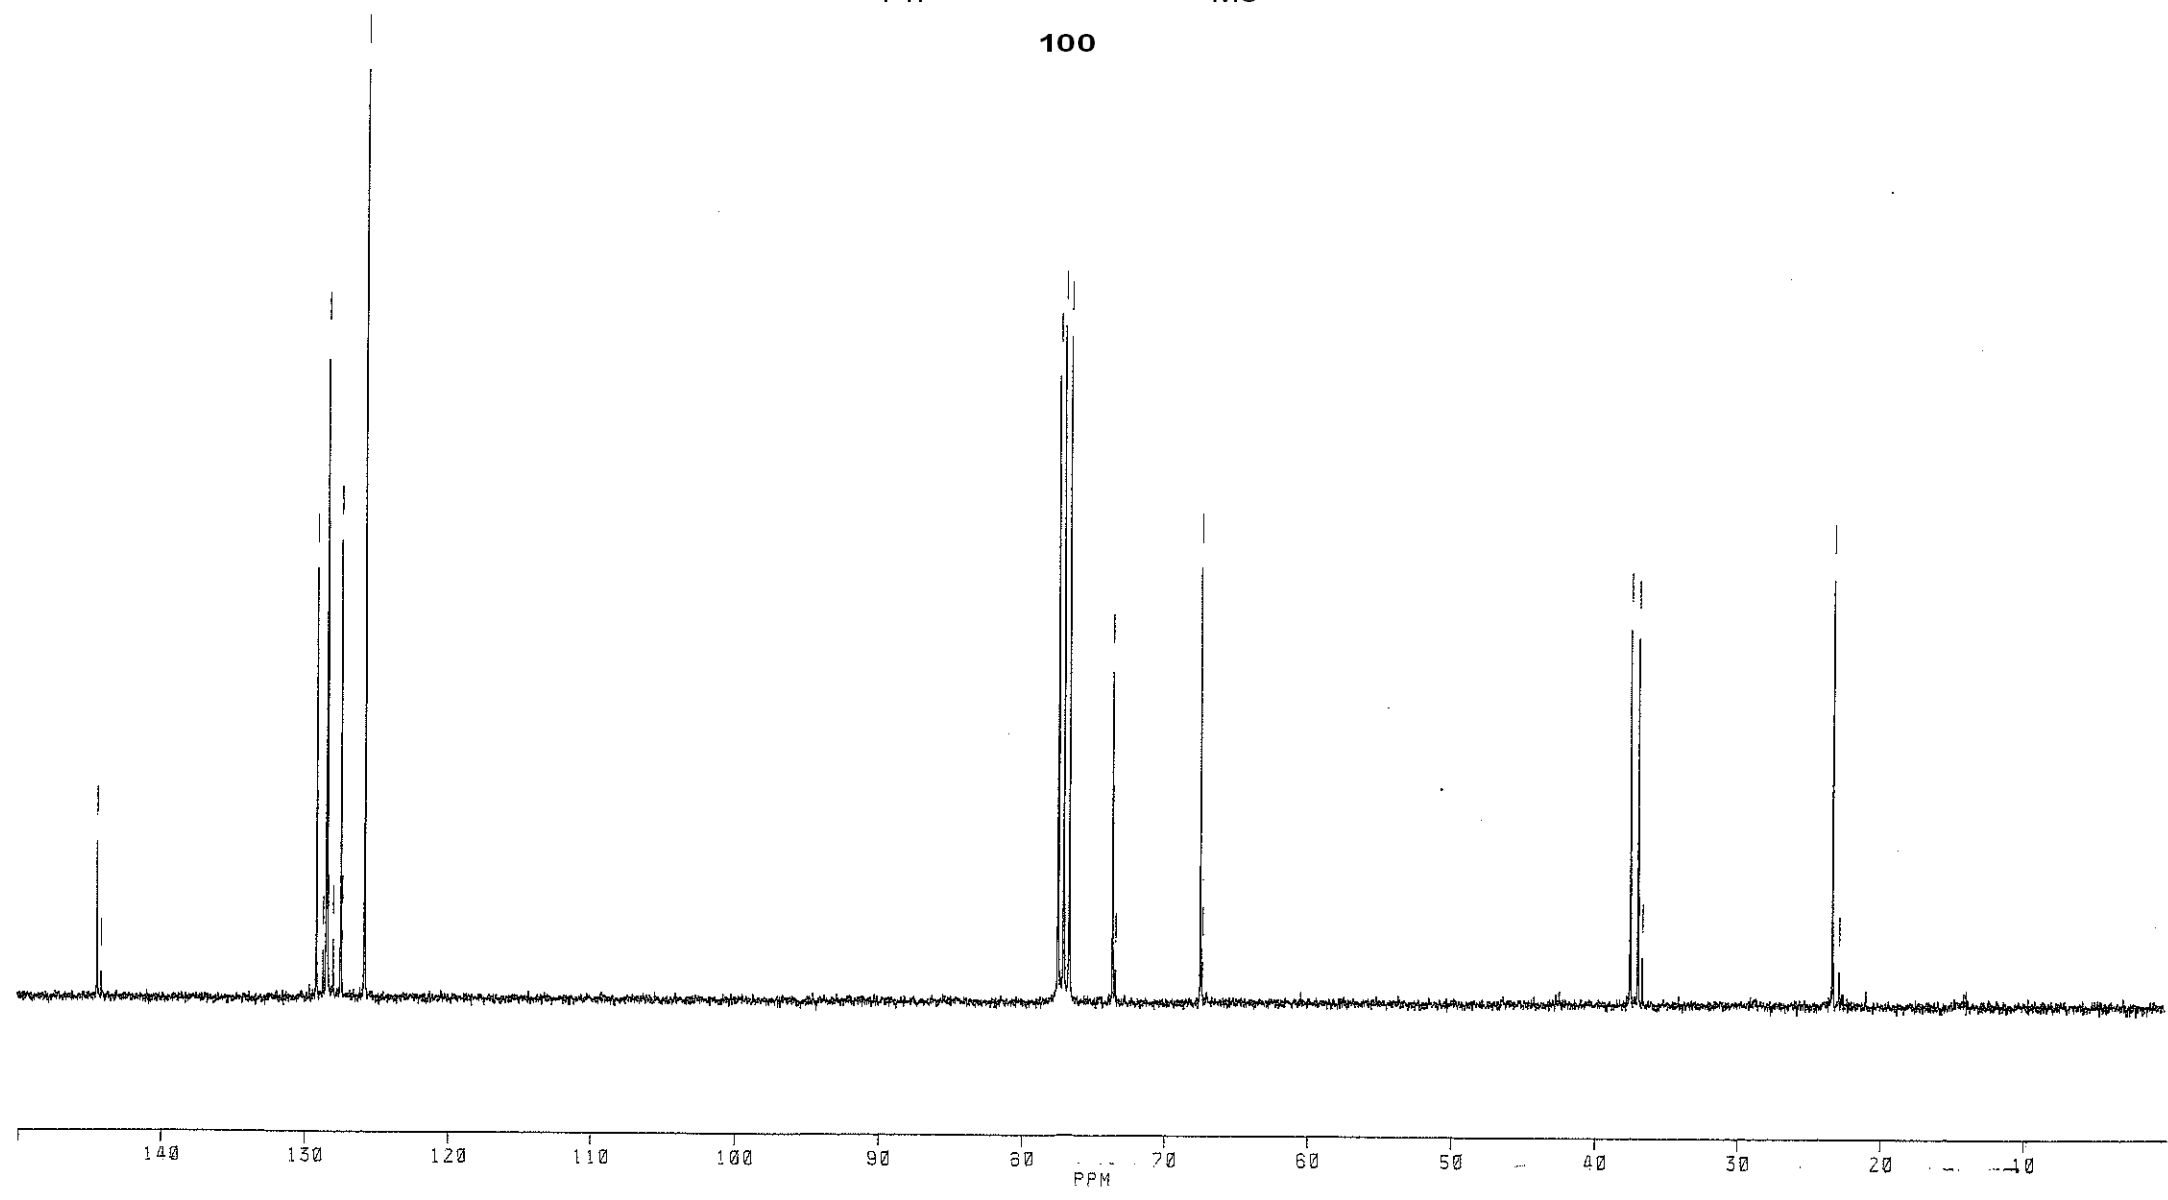

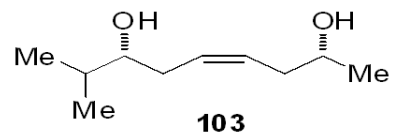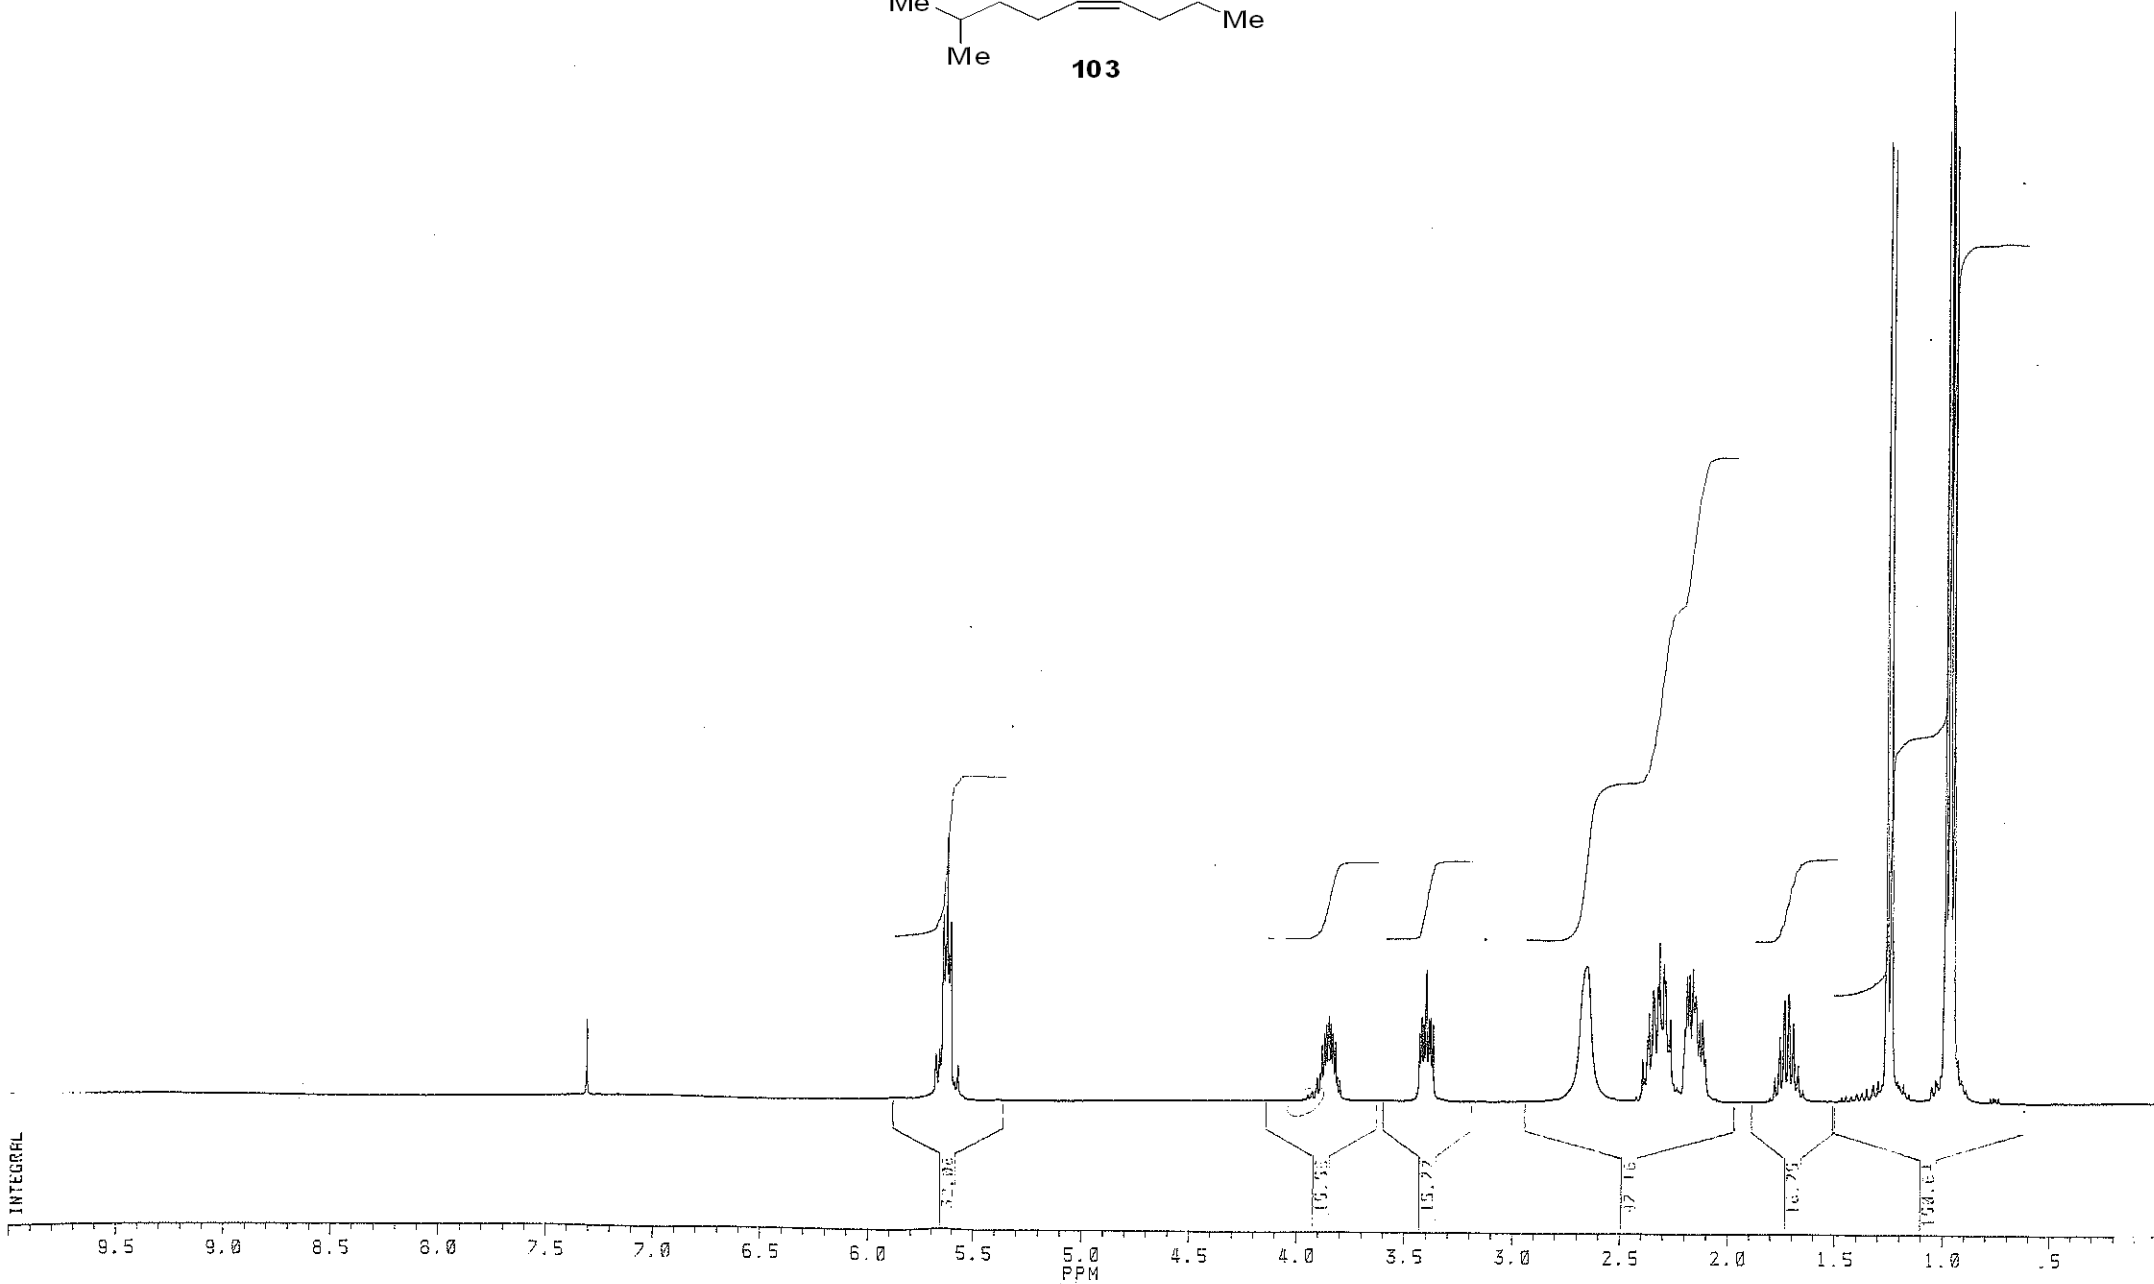



smacc-02-52  
STANDARD 1H OBSERVE

Automation directory: /data/nmrdata/Oct03  
File: 1801

Pulse Sequence: s2pul  
Solvent: cdcl3  
Ambient temperature  
Sample #18  
File: 1801  
INOVA-300 "ratty"

Relax. delay 1.000 sec  
Pulse 45.0 degrees  
Acq. time 3.744 sec  
Width 4797.6 Hz  
16 repetitions  
OBSERVE E1, 299.8458792 MHz  
DATA PROCESSING  
FT size 65536  
Total time 1 min, 16 sec

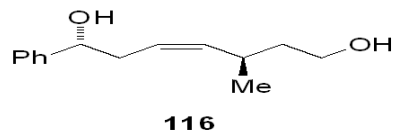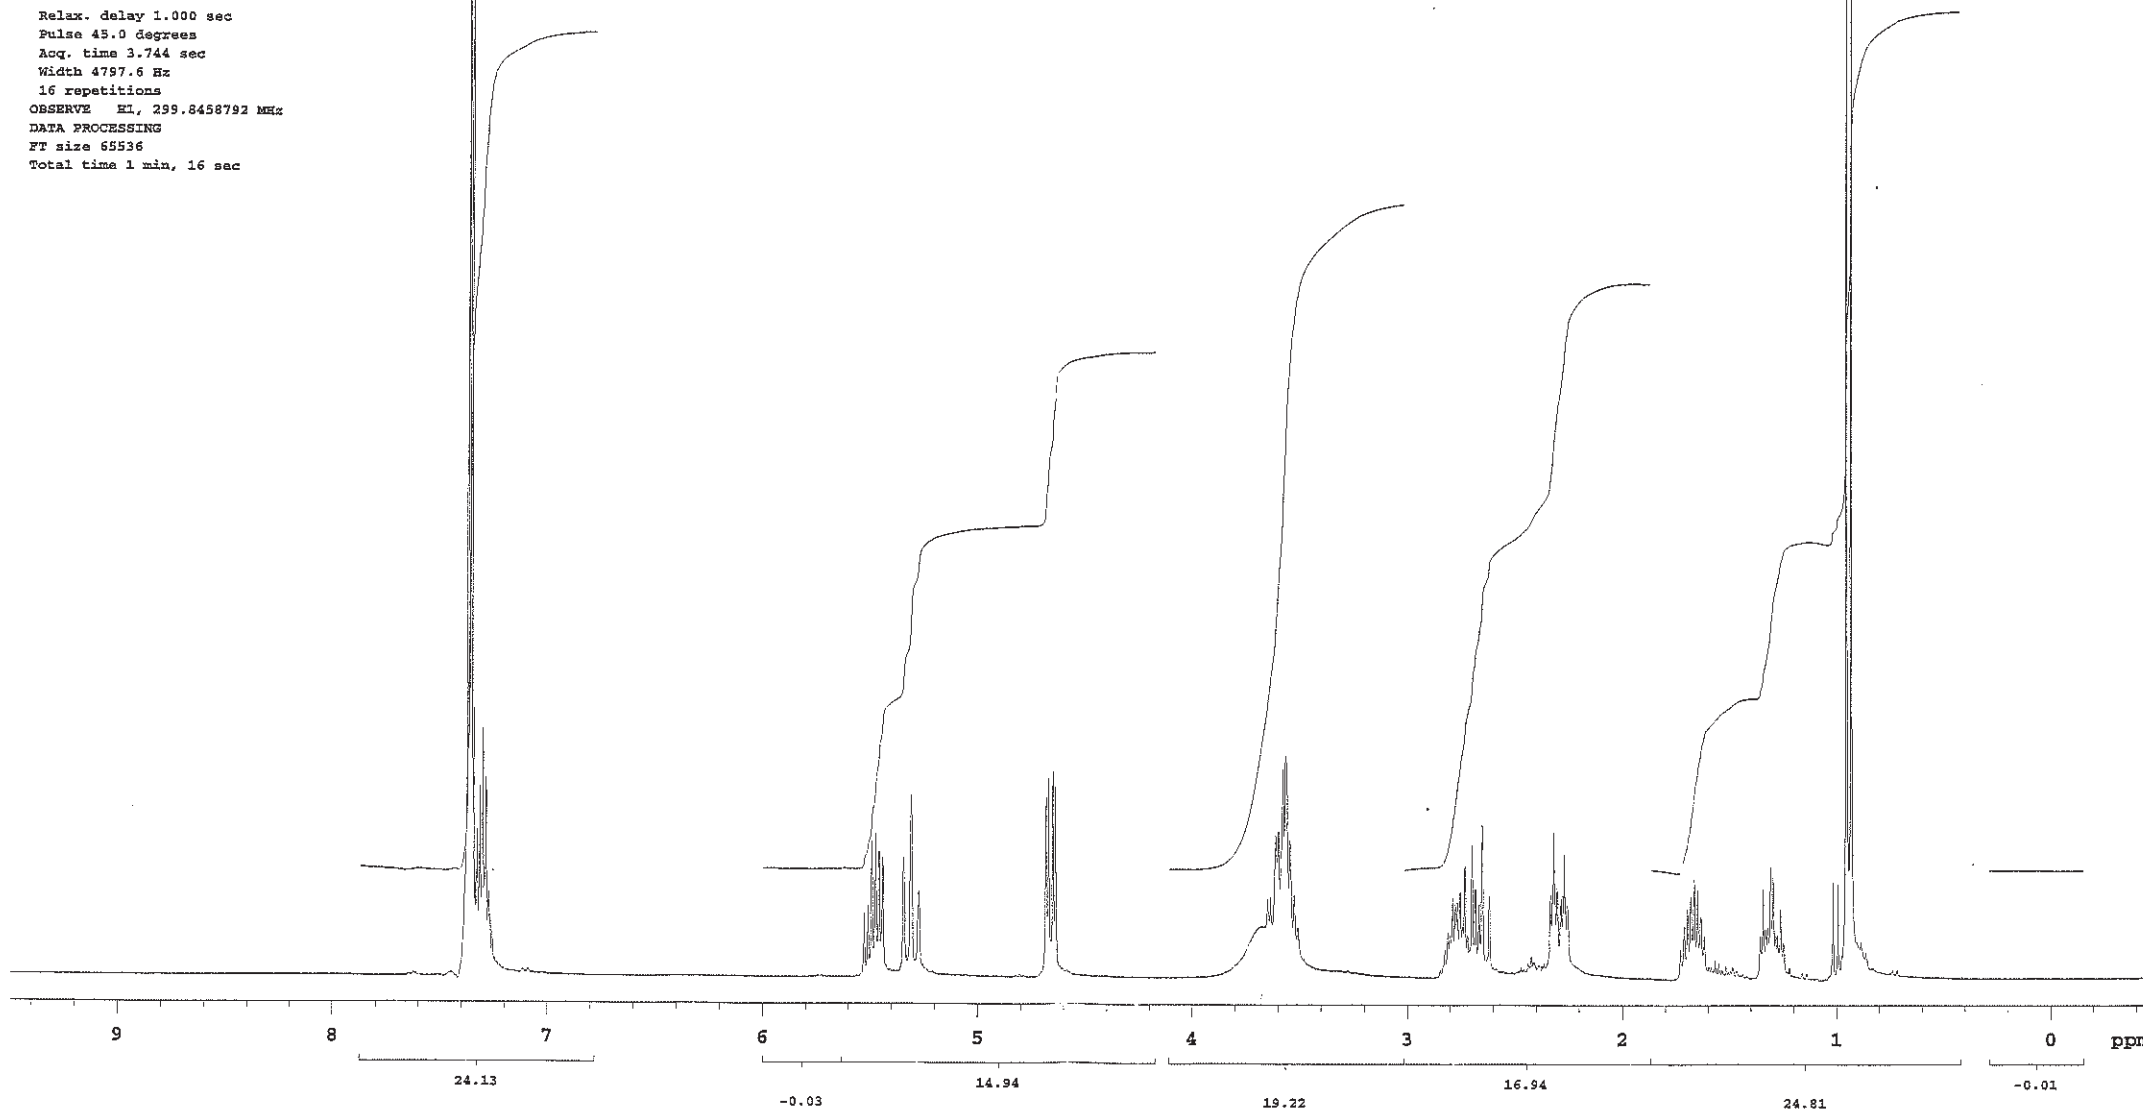

smacc-02-04  
STANDARD 1H OBSERVE

Automation directory: /data/mmrdata/Jun26  
File : 1403

Pulse Sequence: s2pul  
Solvent: cdcl3  
Ambient temperature  
Sample #14  
File: 1403  
INNOVA-300 "ratty"

Relax. delay 1.000 sec  
Pulse 45.0 degrees  
Acq. time 1.815 sec  
Width 18850.1 Hz  
2048 repetitions  
OBSERVE C13, 75.2962883 MHz  
DECOUPLE H1, 299.8473786 MHz  
Power 37 dB  
continuously on  
WALTZ-16 modulated  
DATA PROCESSING  
Line broadening 1.0 Hz  
FT size 131072  
Total time 1 hr, 36 min, 23 sec

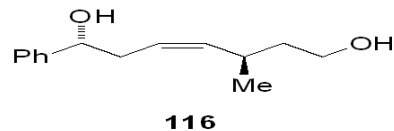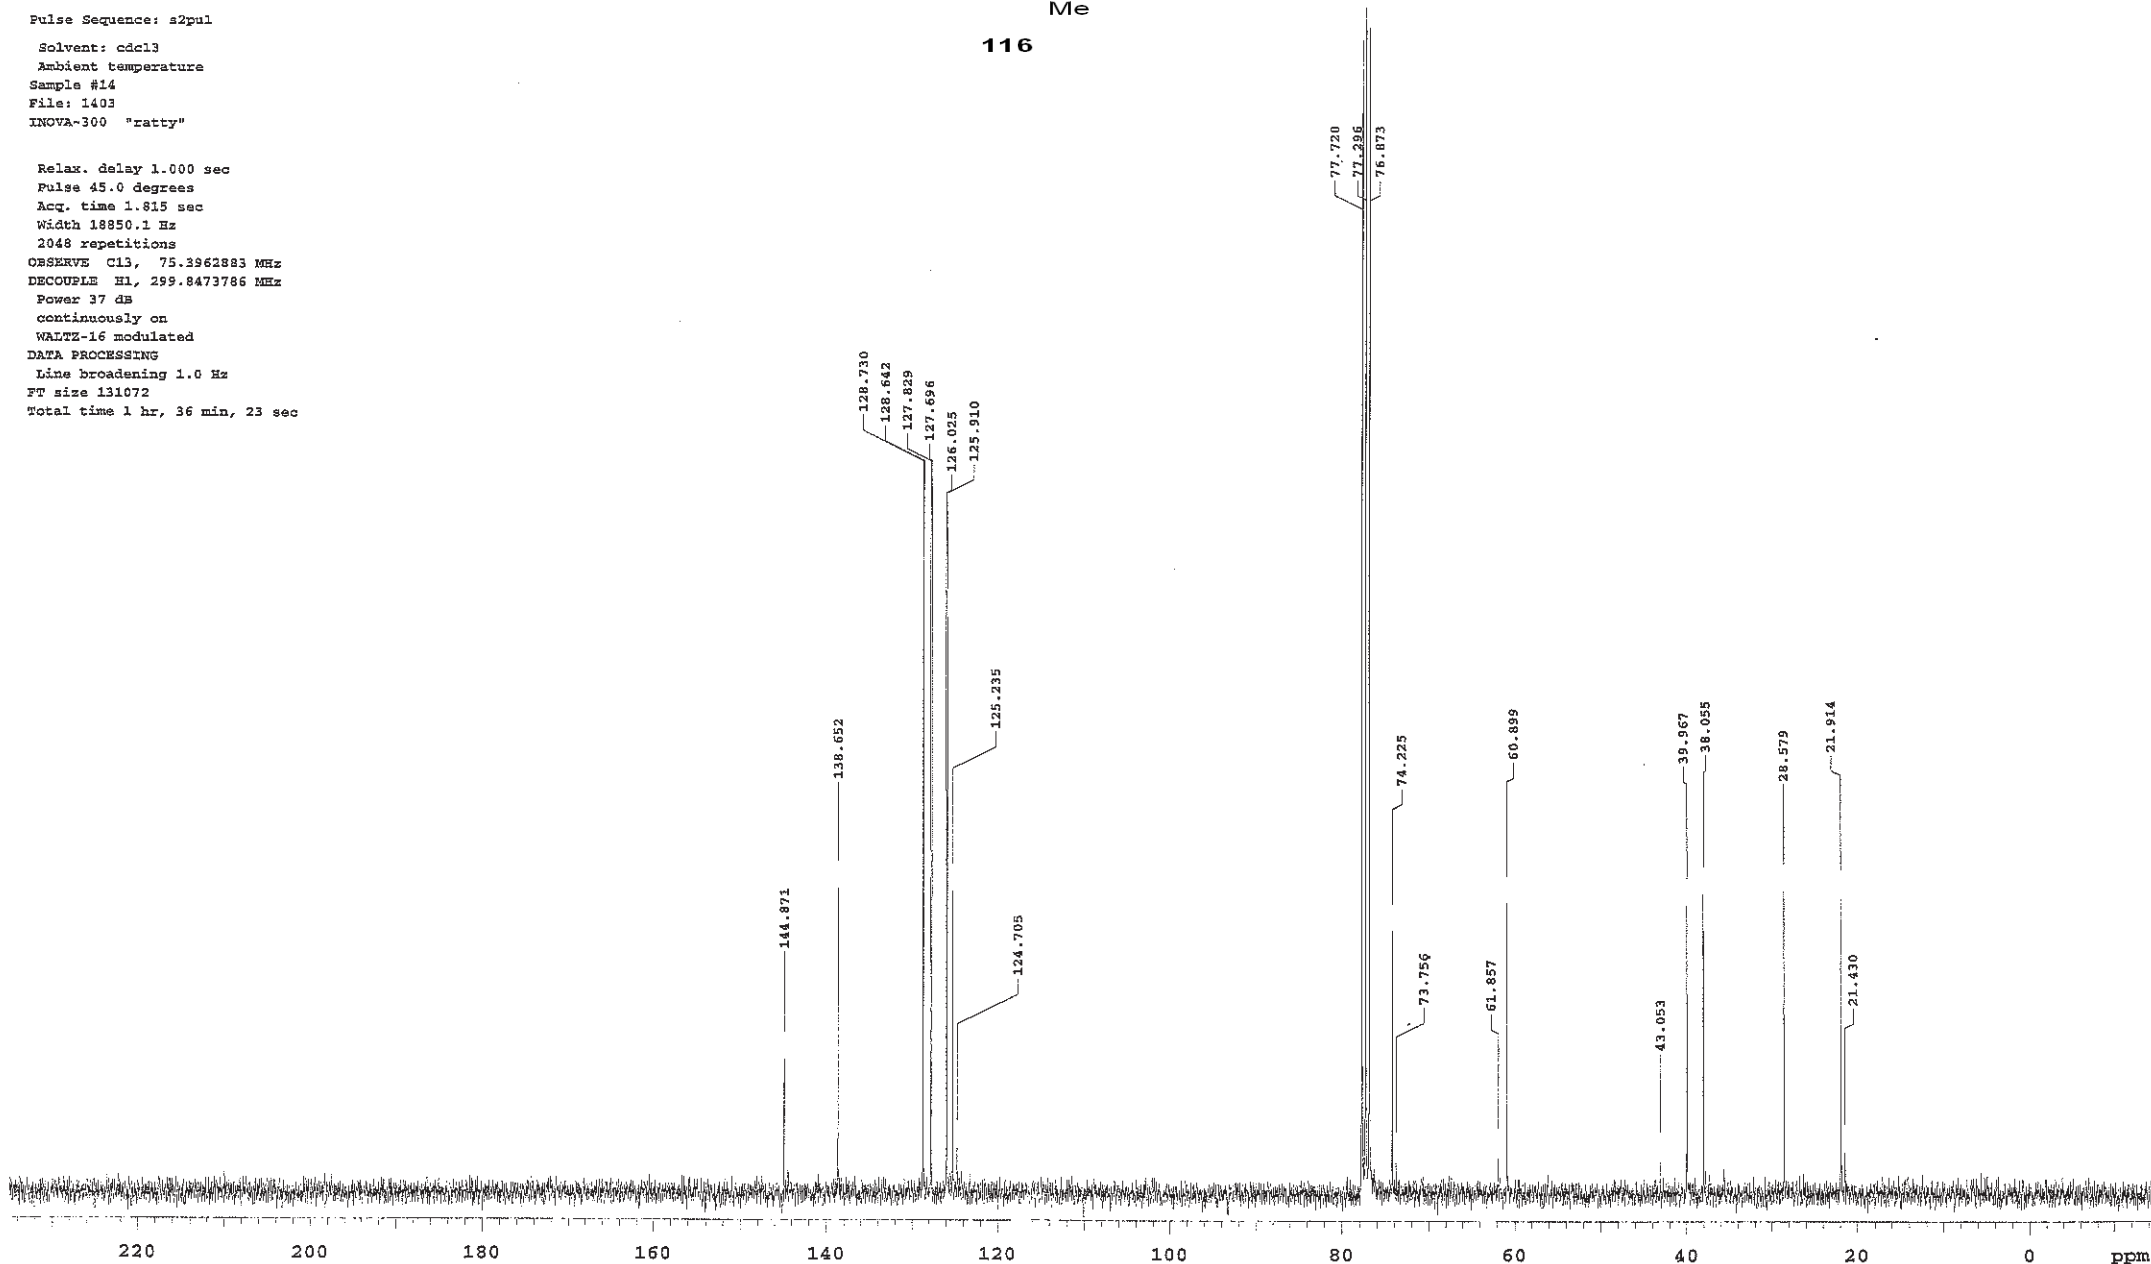

smacc-02-62  
STANDARD 1H OBSERVE

Automation directory: /data/nmrdata/Oct27  
File : 3501

Pulse Sequence: s2pul

Solvent: cdcl3  
Ambient temperature  
Sample #35  
File: 3501  
INNOVA-300 "ratty"

Relax. delay 1.000 sec  
Pulse 45.0 degrees  
Acq. time 3.744 sec  
Width 4797.6 Hz  
16 repetitions  
OBSERVE H1, 299.8458792 MHz  
DATA PROCESSING  
FT size 65536  
Total time 1 min, 16 sec

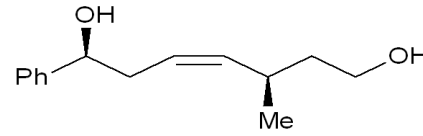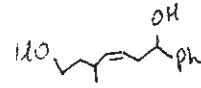

120

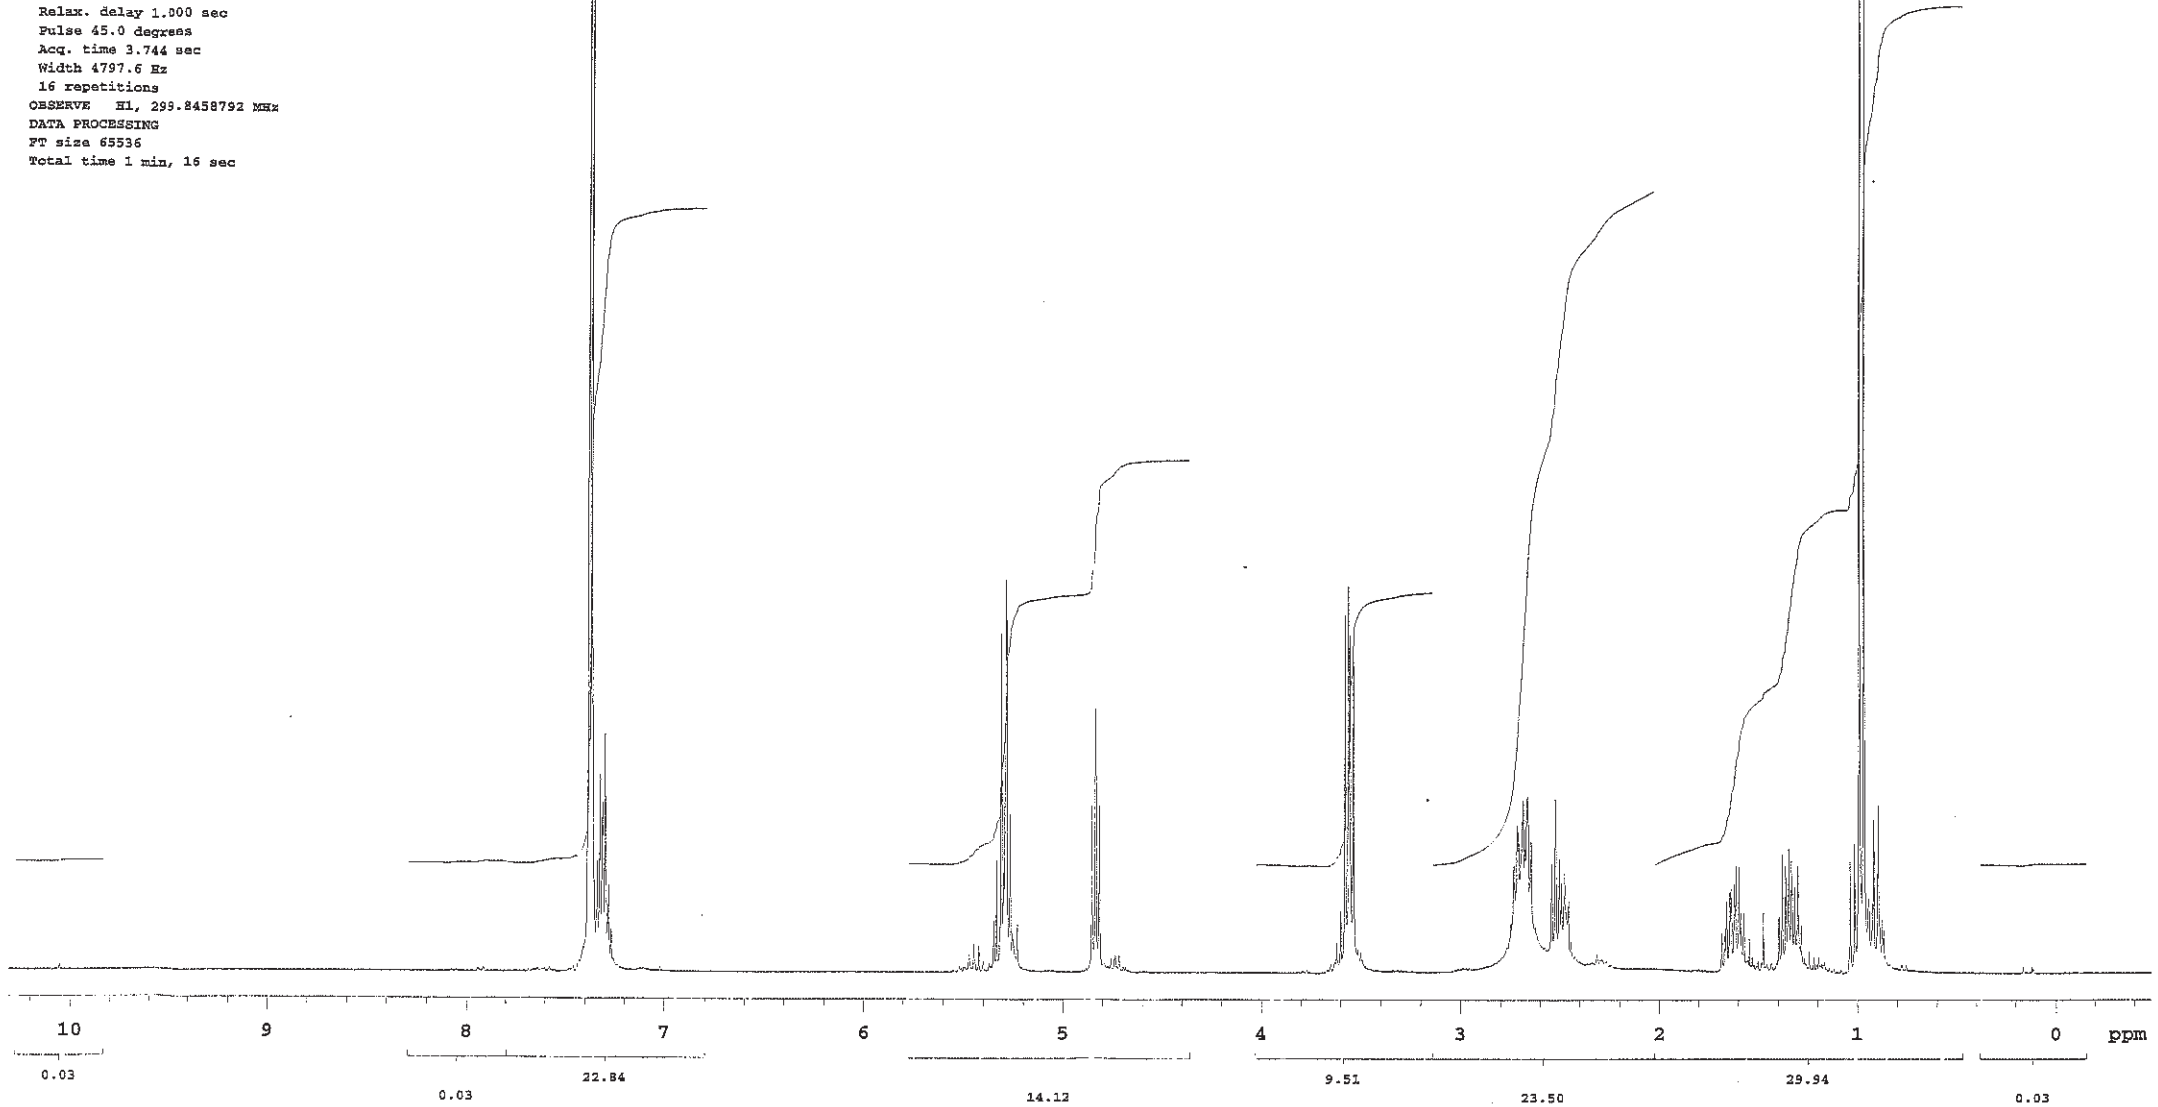

smacc-02-62  
13C OBSERVE

pad=2 run with findz0 before acquisition

Automation directory: /data/nmrdata/Oct27  
File : 5001

Pulse Sequence: s2pul

Solvent: cdcl3  
Ambient temperature  
Sample #50  
File: 5001  
INOVA-300 "ratty"

Relax. delay 1.000 sec  
Pulse 45.0 degrees  
Acq. time 1.816 sec  
Width 18850.1 Hz  
256 repetitions  
OBSERVE C13, 75.3952883 MHz  
DECUPLE H1, 299.8473786 MHz  
Power 37 dB  
continuously on  
WALTZ-16 modulated  
DATA PROCESSING  
Line broadening 1.0 Hz  
FT size 131072  
Total time 12 min, 2 sec

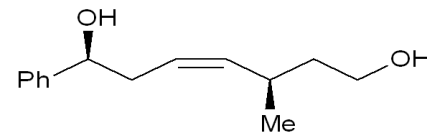

120

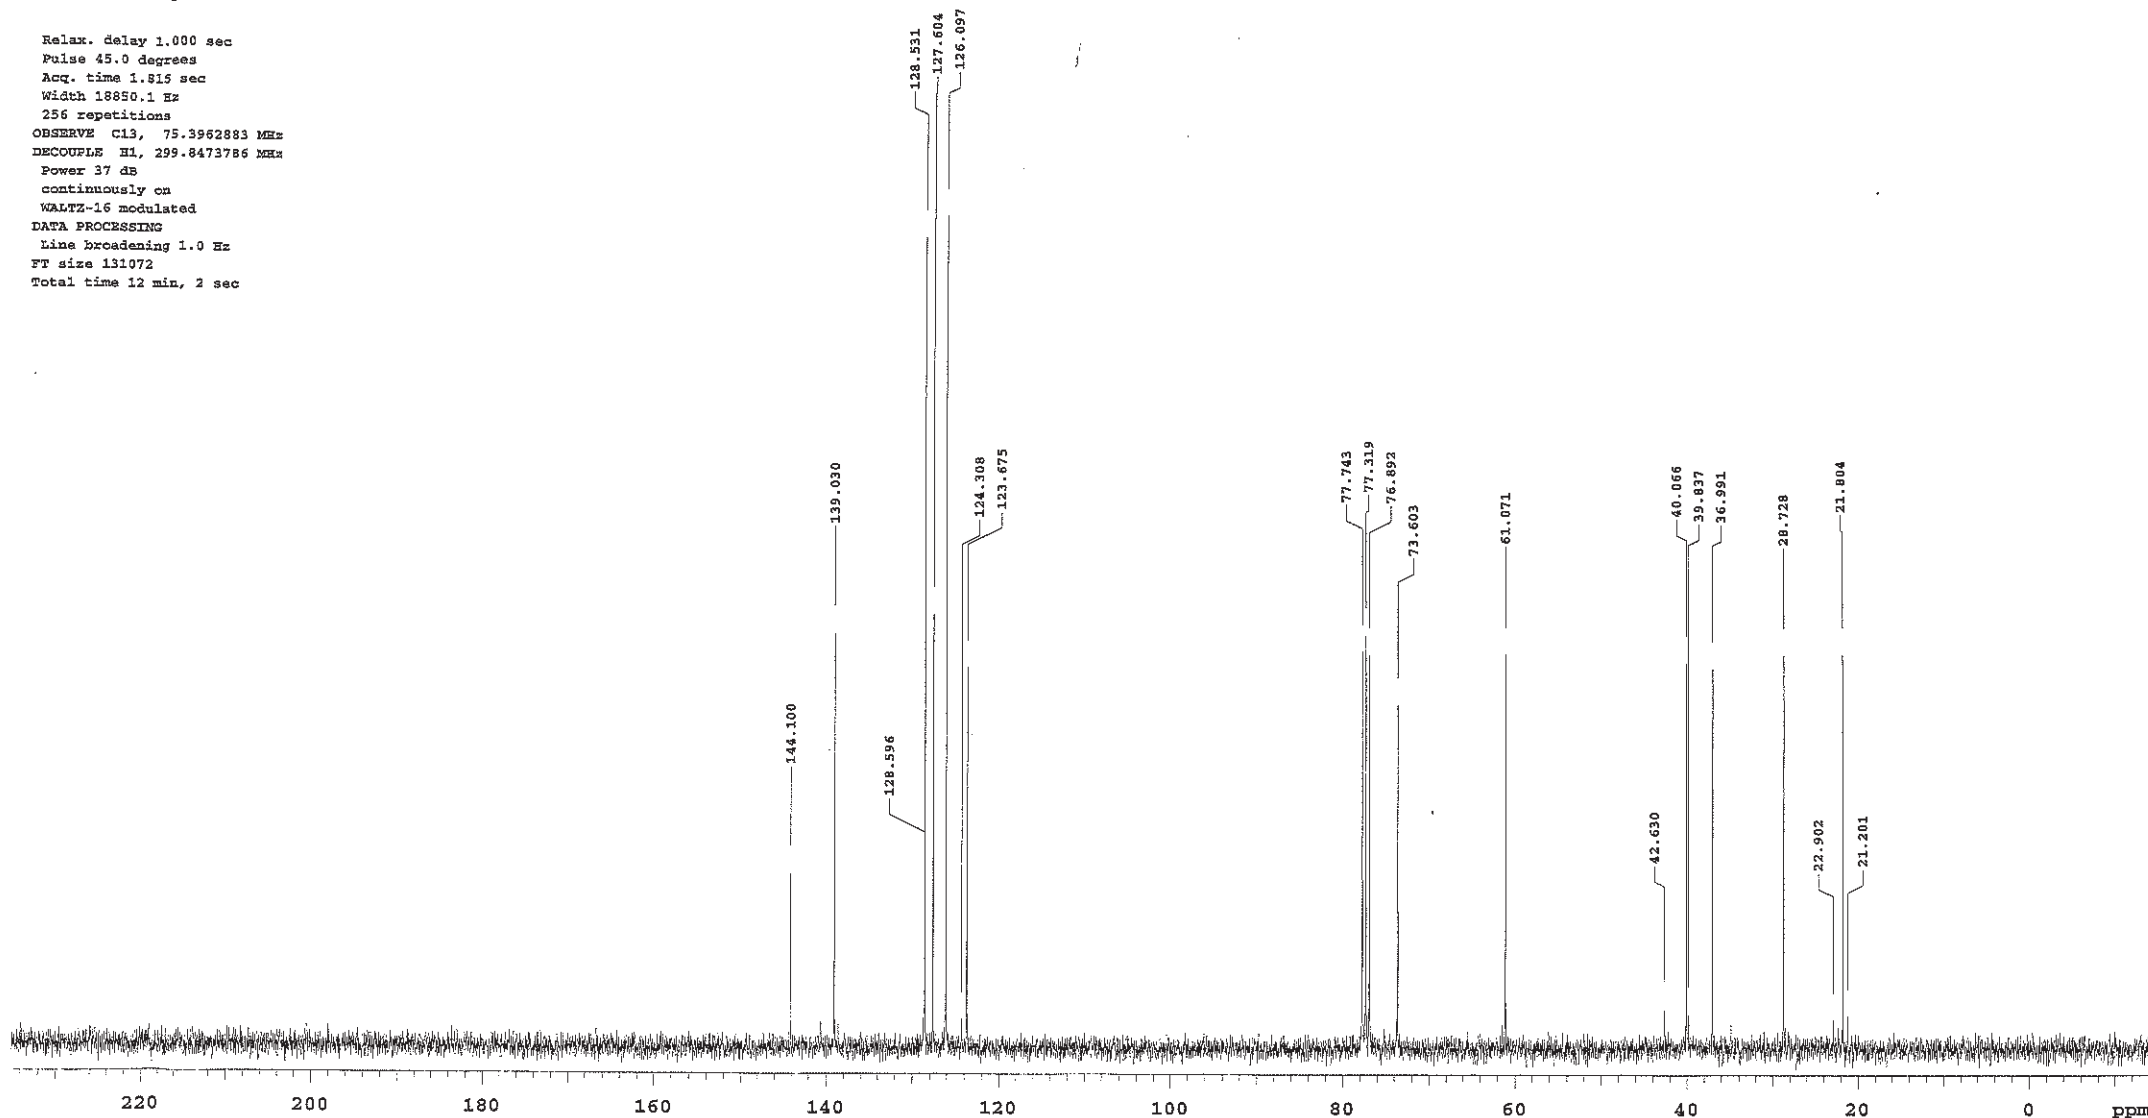



smacc-03-4cme  
STANDARD 1H OBSERVE

Automation directory: /data/nmrdata/Sep27  
File : 1501

Pulse Sequence: s2pul

Solvent: cdcl3  
DATE Sep 27 2009  
Sample #15  
File: 1501  
INOVA-300 "ratty"

Relax. delay 1.000 sec  
Pulse 45.0 degrees  
Acq. time 3.744 sec  
Width 4797.6 Hz  
16 repetitions  
OBSERVE H1, 299.8458792 MHz  
DATA PROCESSING  
FT size 65536  
Total time 1 min, 16 sec

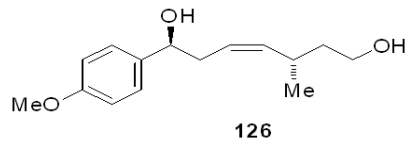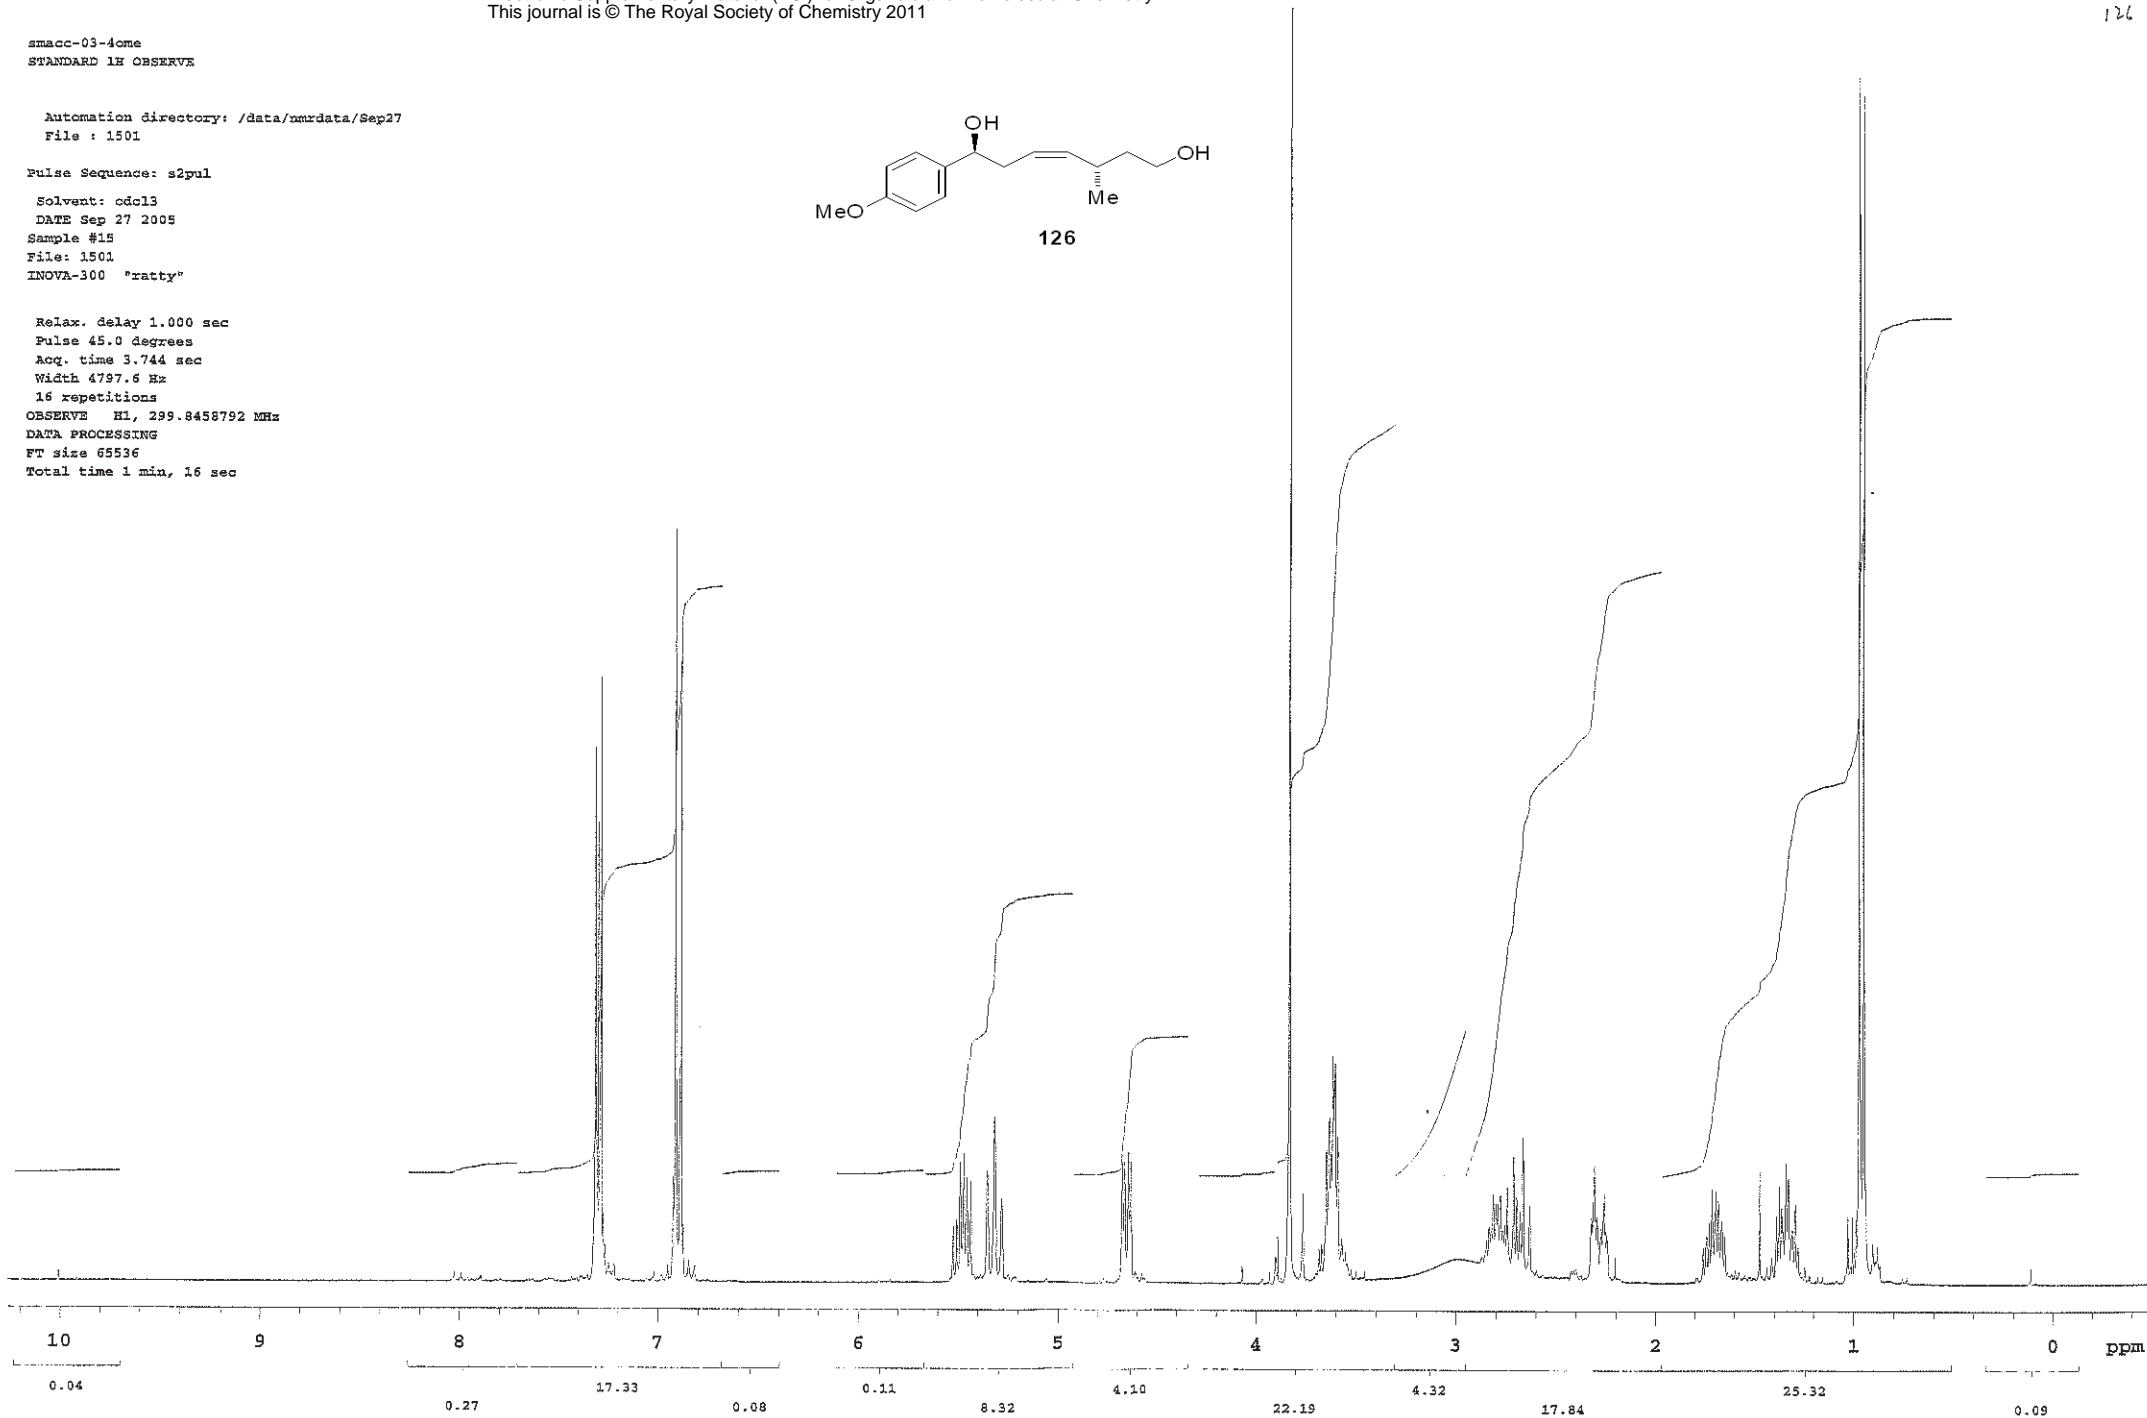

smacc-03-anis  
STANDARD 1K OBSERVE

Automation directory: /data/nmrdata/Sep26  
File : 0404

Pulse Sequence: s2pul

Solvent: cdcl3  
DATE Sep 27 2005  
Sample #4  
File: 0404  
INOVA-300 "ratty"

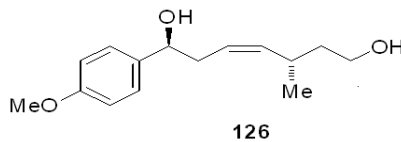

Relax. delay 1.000 sec  
Pulse 45.0 degrees  
Acq. time 1.815 sec  
Width 18850.1 Hz  
256 repetitions  
OBSERVE C13, 75.3962883 MHz  
DECOUPLE H1, 299.8473788 MHz  
Power 37 dB  
continuously on  
WALTZ-16 modulated  
DATA PROCESSING  
Line broadening 1.0 Hz  
FT size 131072  
Total time 12 min, 2 sec

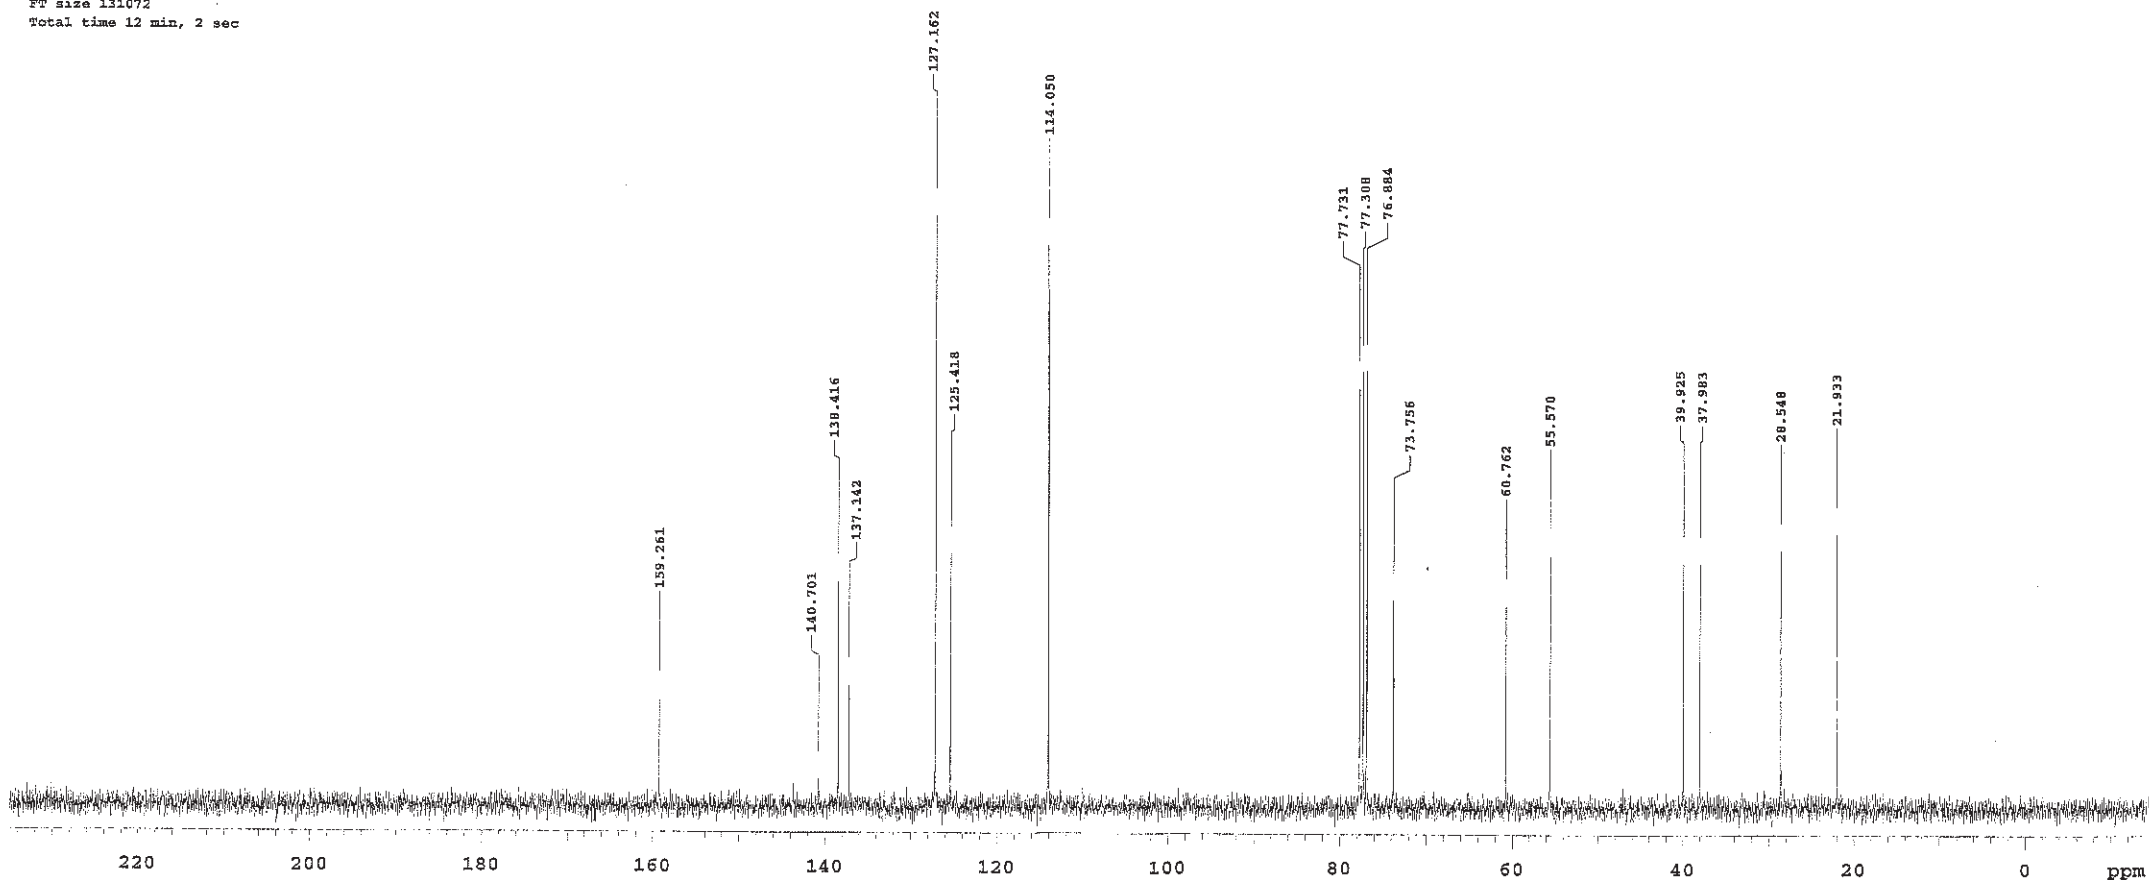

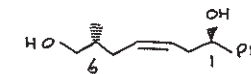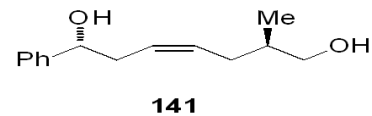

S. Stanway  
SS565  
cdc13  
907

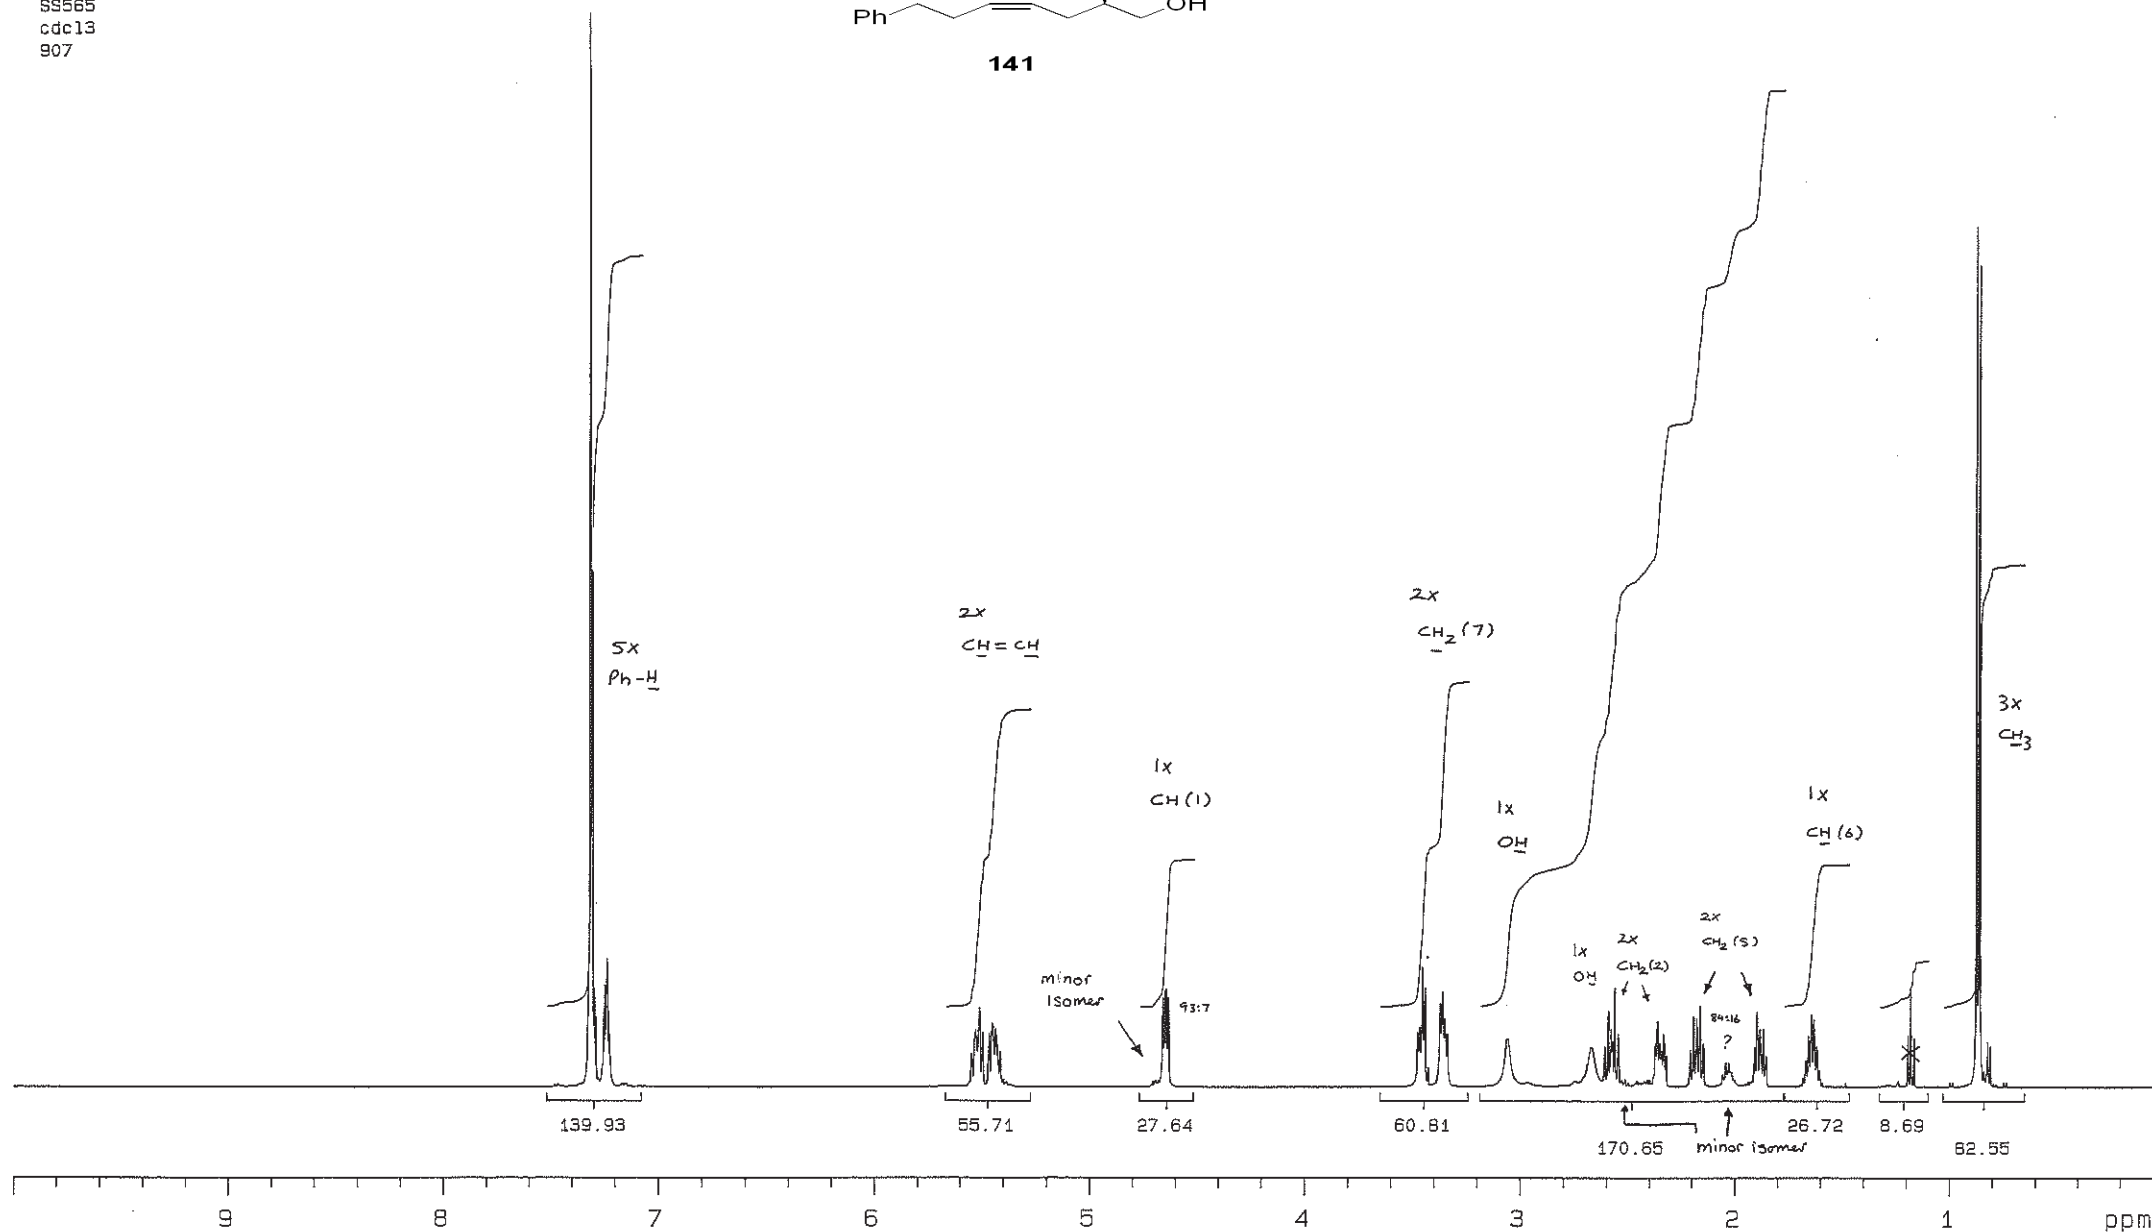

PPM

144.445

131.263

128.368

27.468

26.563

25.734

77.516

77.003

76.671

73.776

66.805

37.582

35.690

30.978

16.955

H O

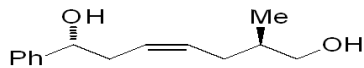

141

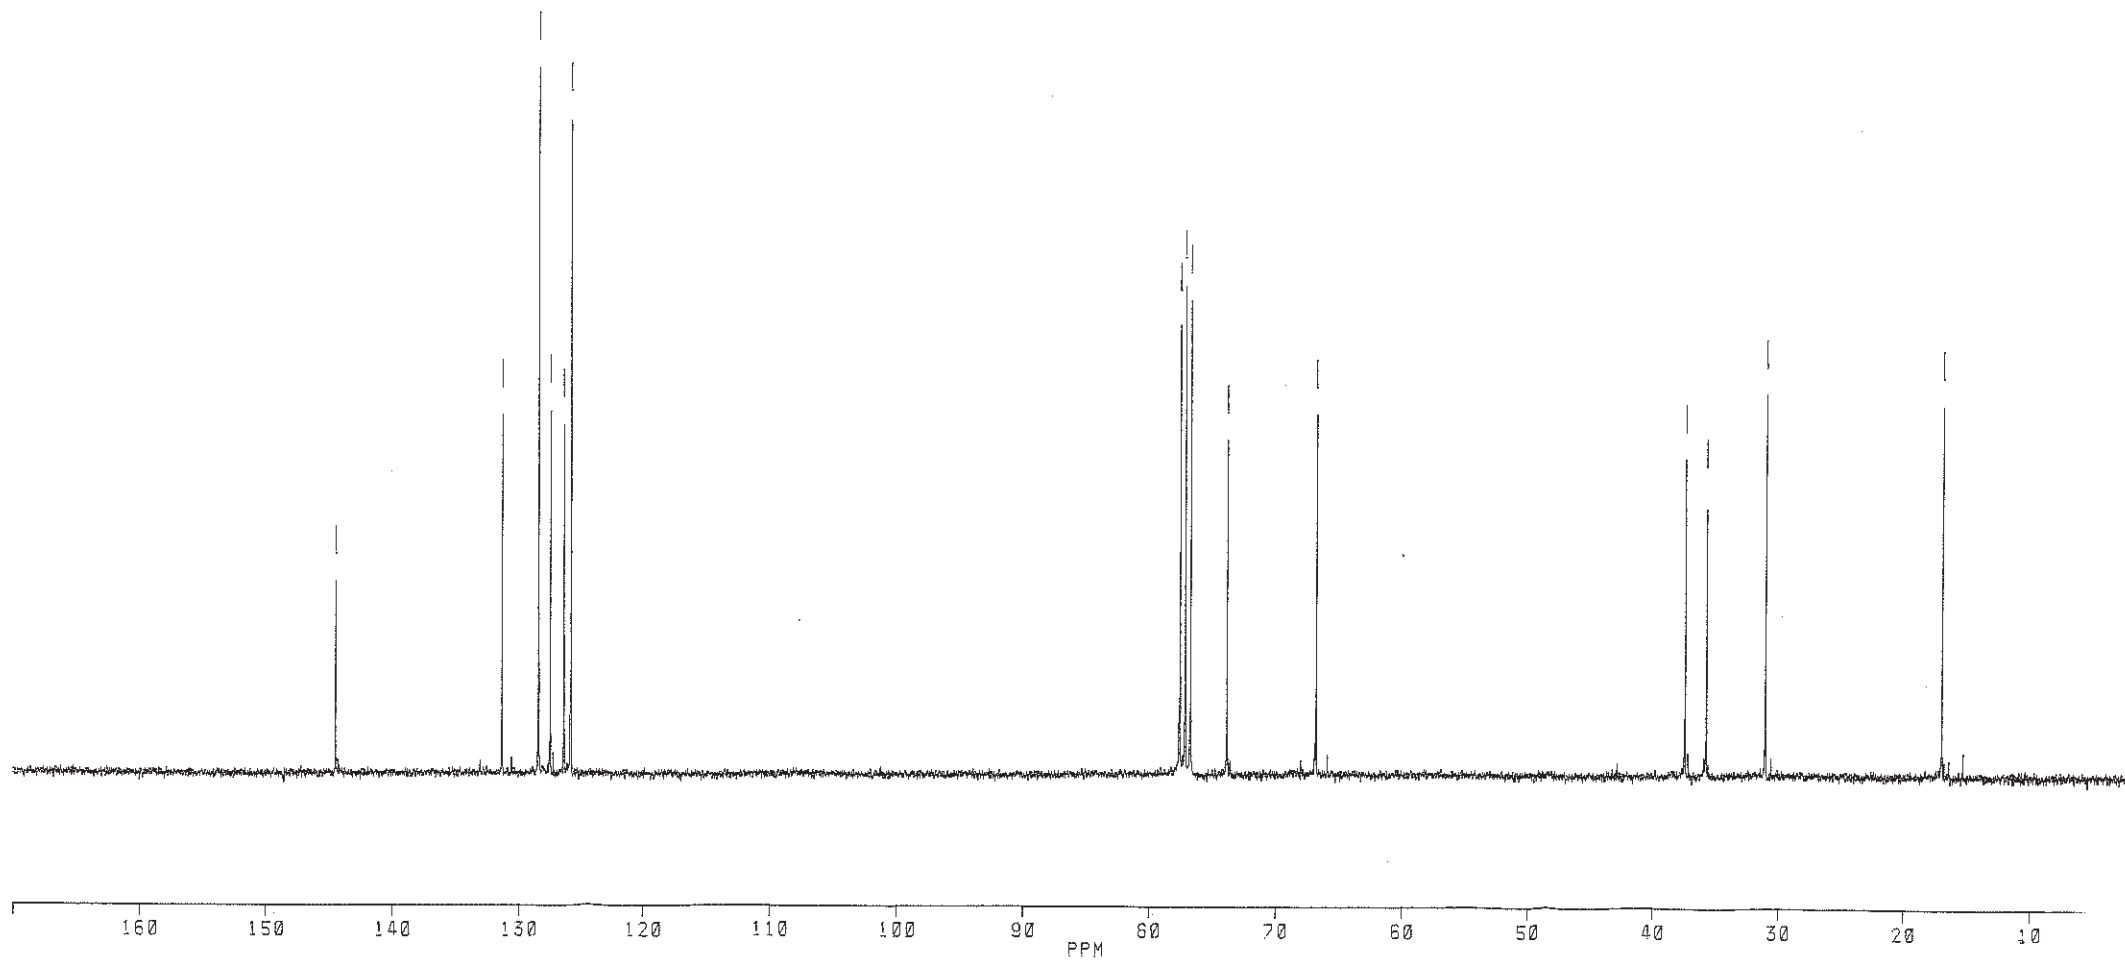

S. Stanway  
SS585 (INV)  
cdc13  
10D

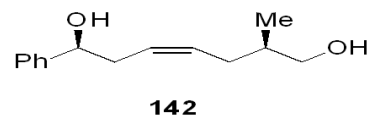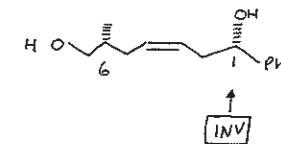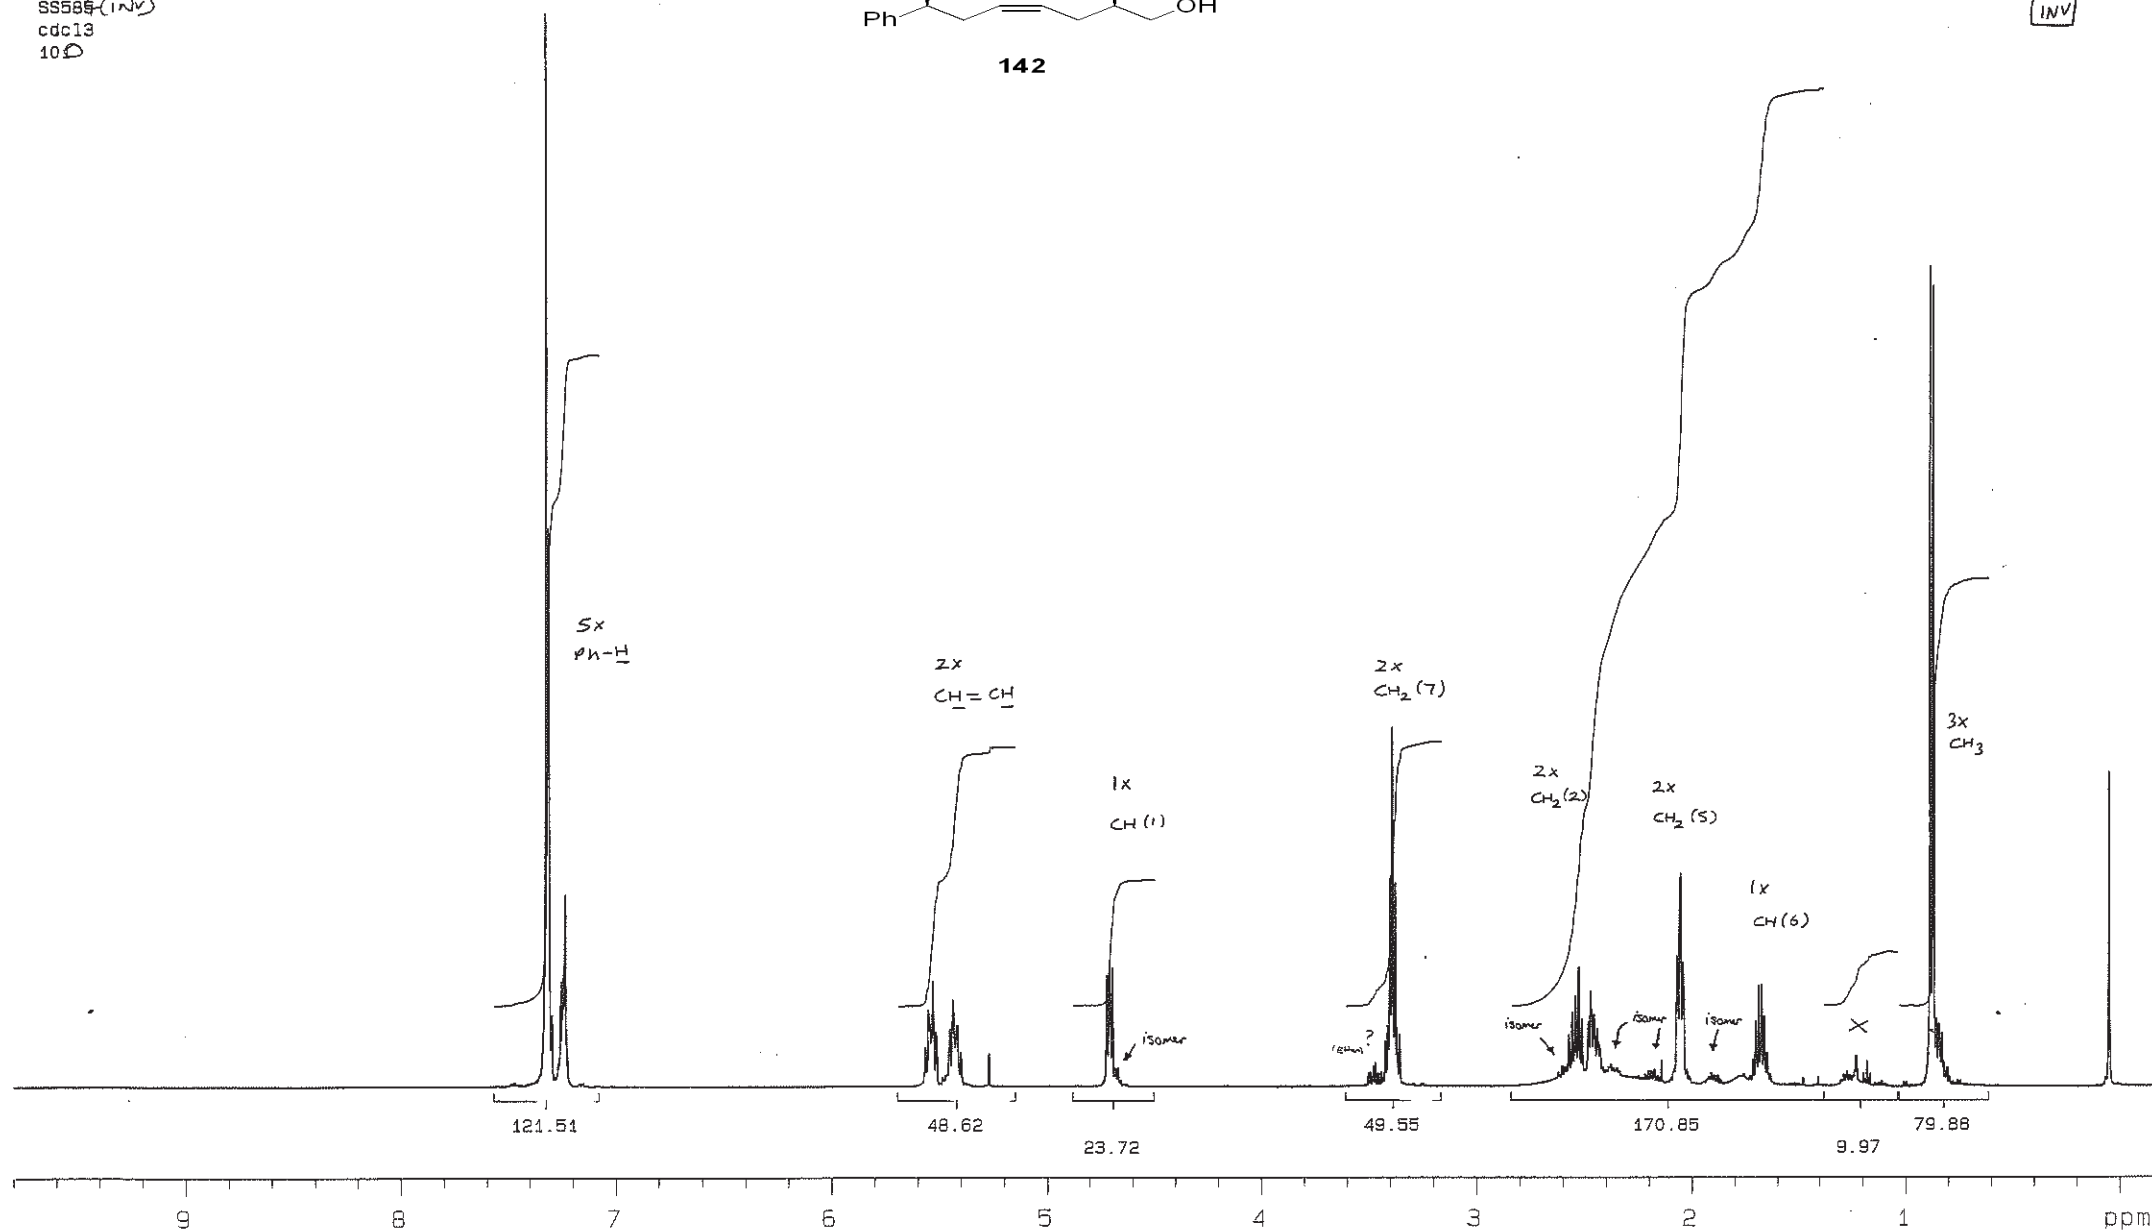

PPH

144.375  
144.166

131.526  
130.652  
128.583  
127.429  
127.152  
126.542  
126.281  
125.810

77.481  
77.259  
77.059  
76.837  
73.857  
73.765  
73.520

67.069  
66.937

37.583  
37.142  
35.846  
35.749  
35.650  
30.988  
30.685

16.921  
16.420  
14.089

1.045

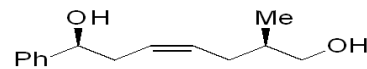

142

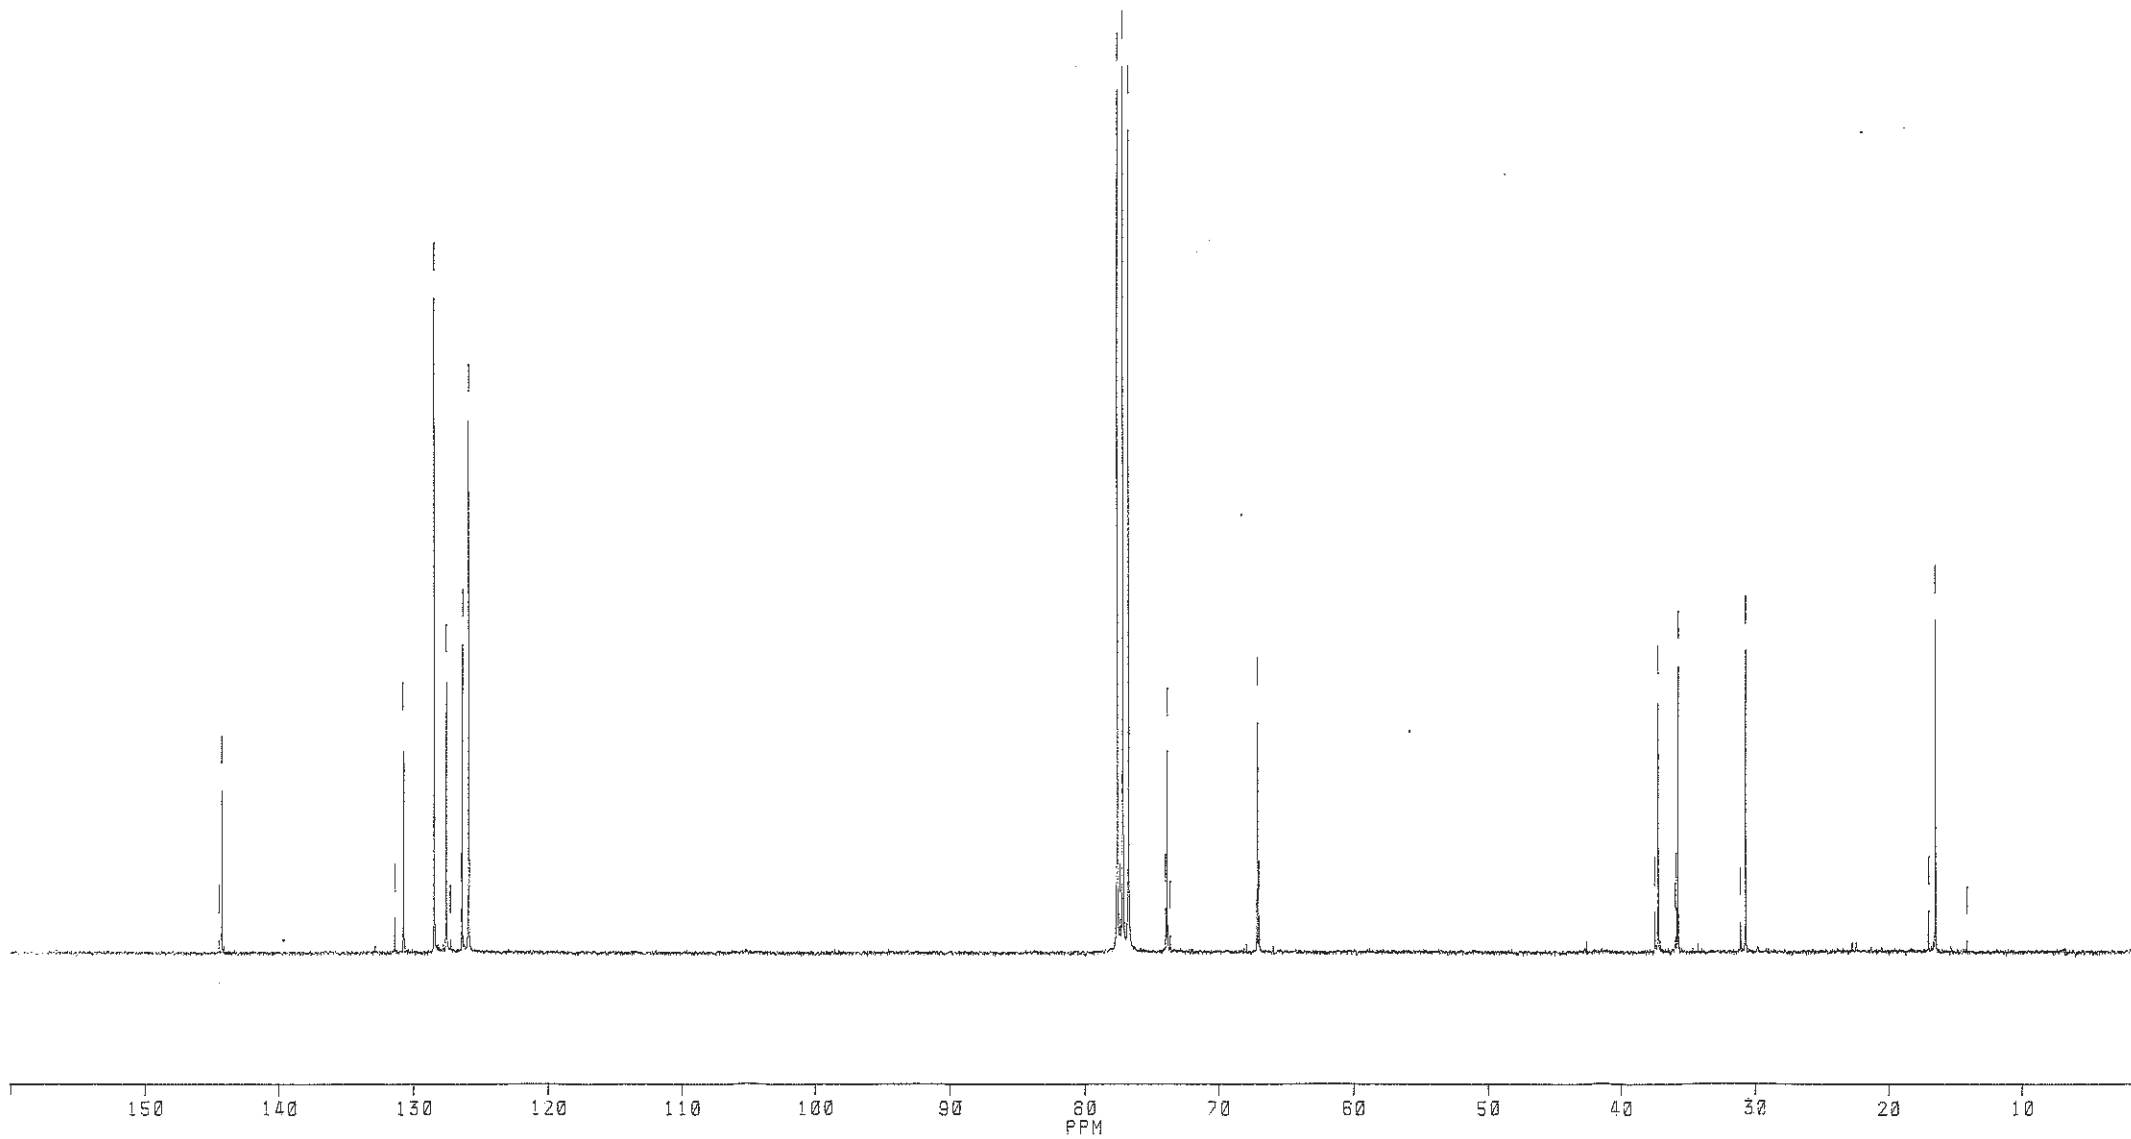

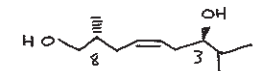

S. Stanway  
SS585  
cdc13  
101

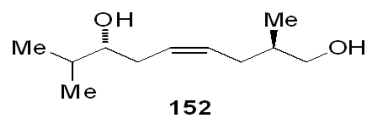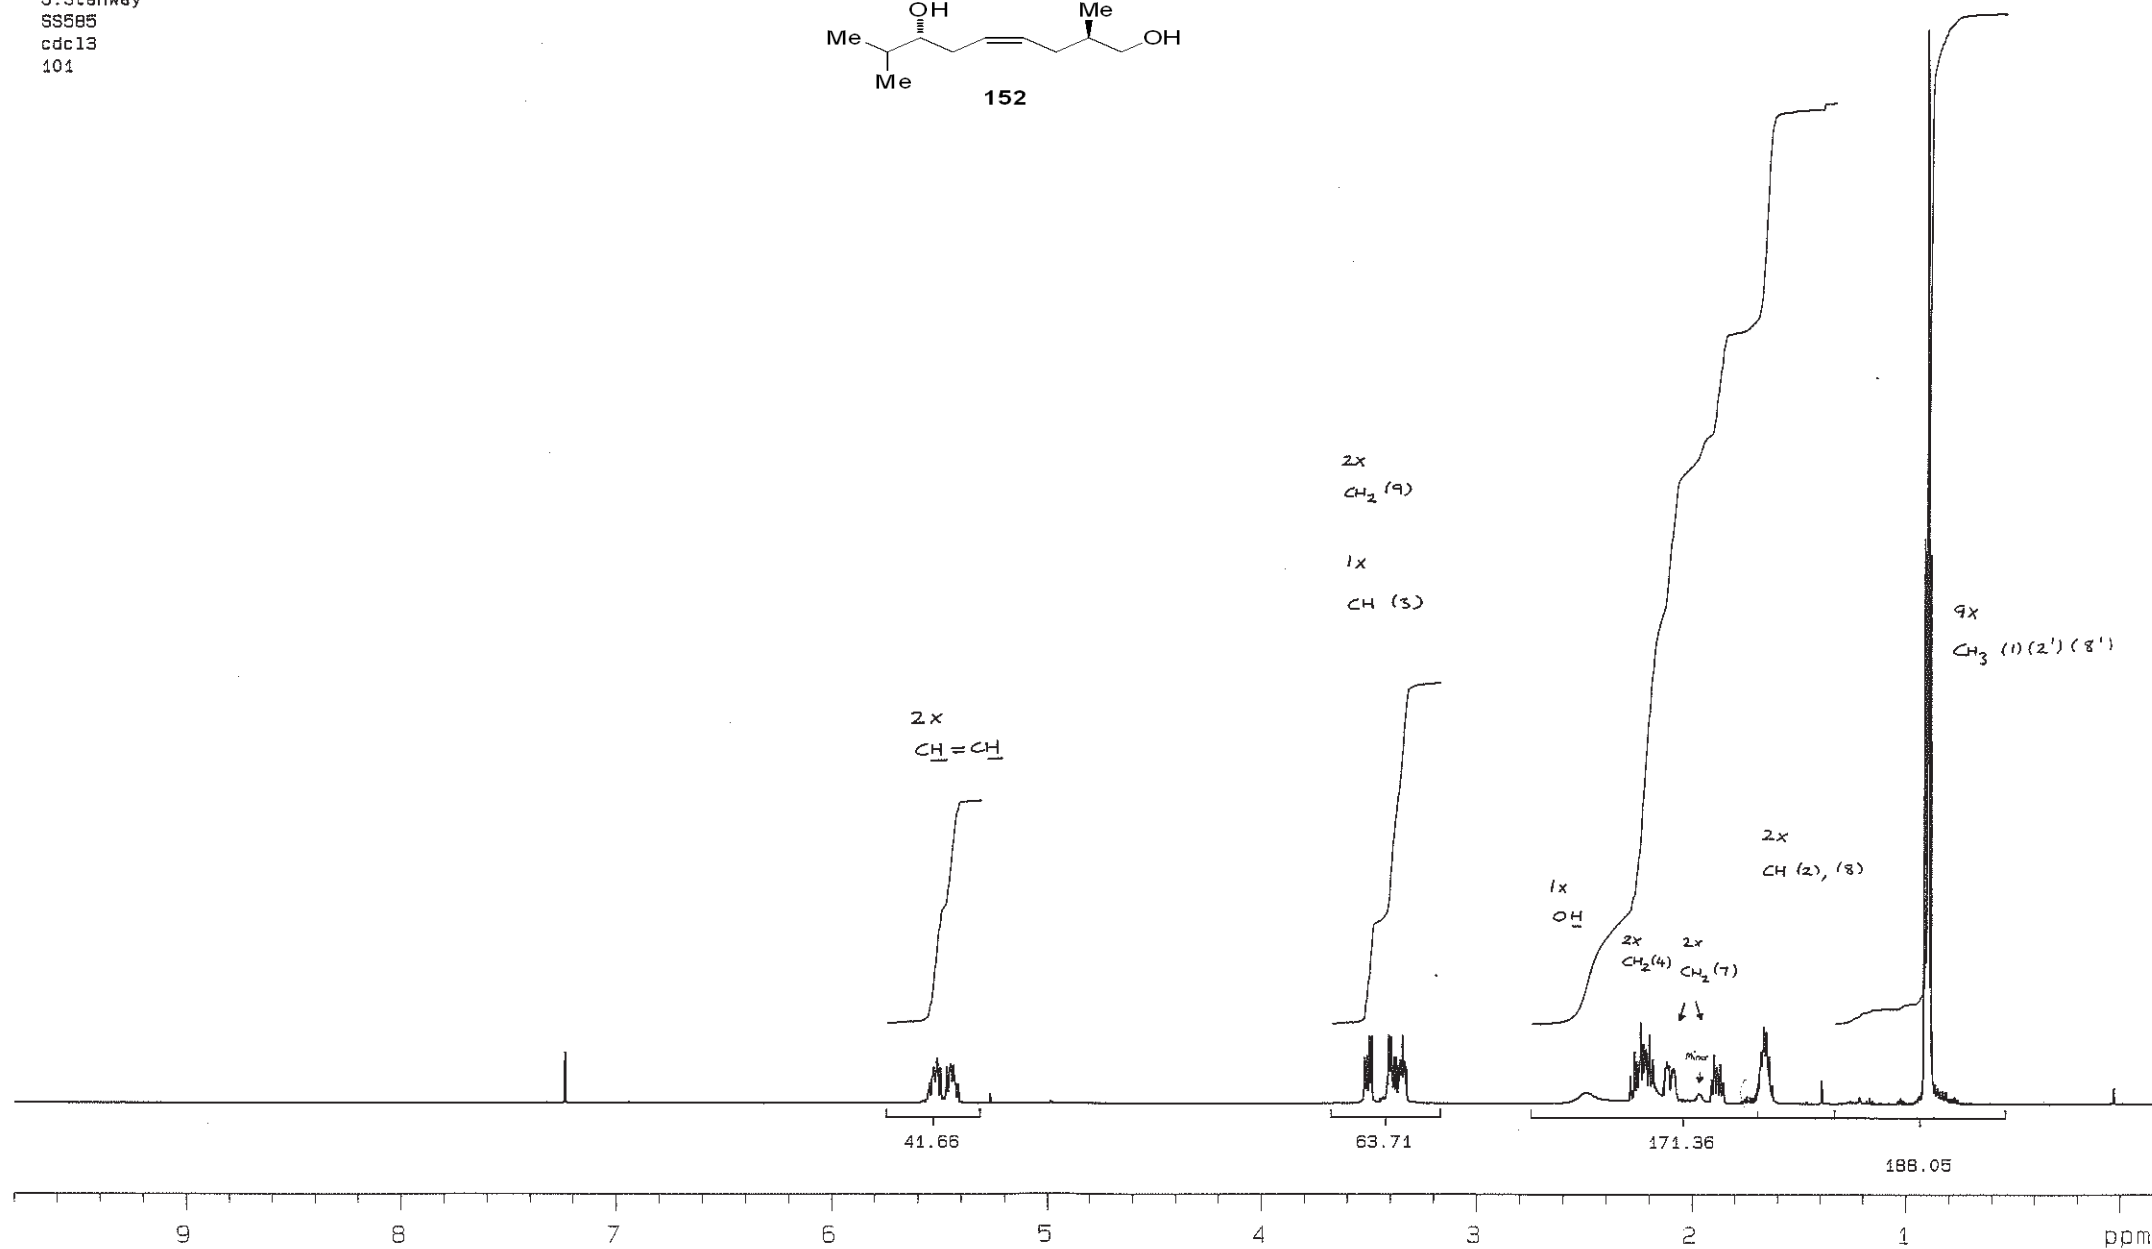

PPM

130.990

127.316

77.482

72.063

76.640

76.284

66.783

35.630

35.555

35.275

31.976

30.994

30.476

16.295

16.232

12.617

12.641

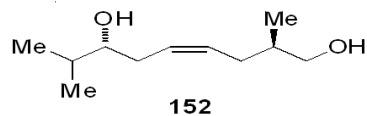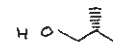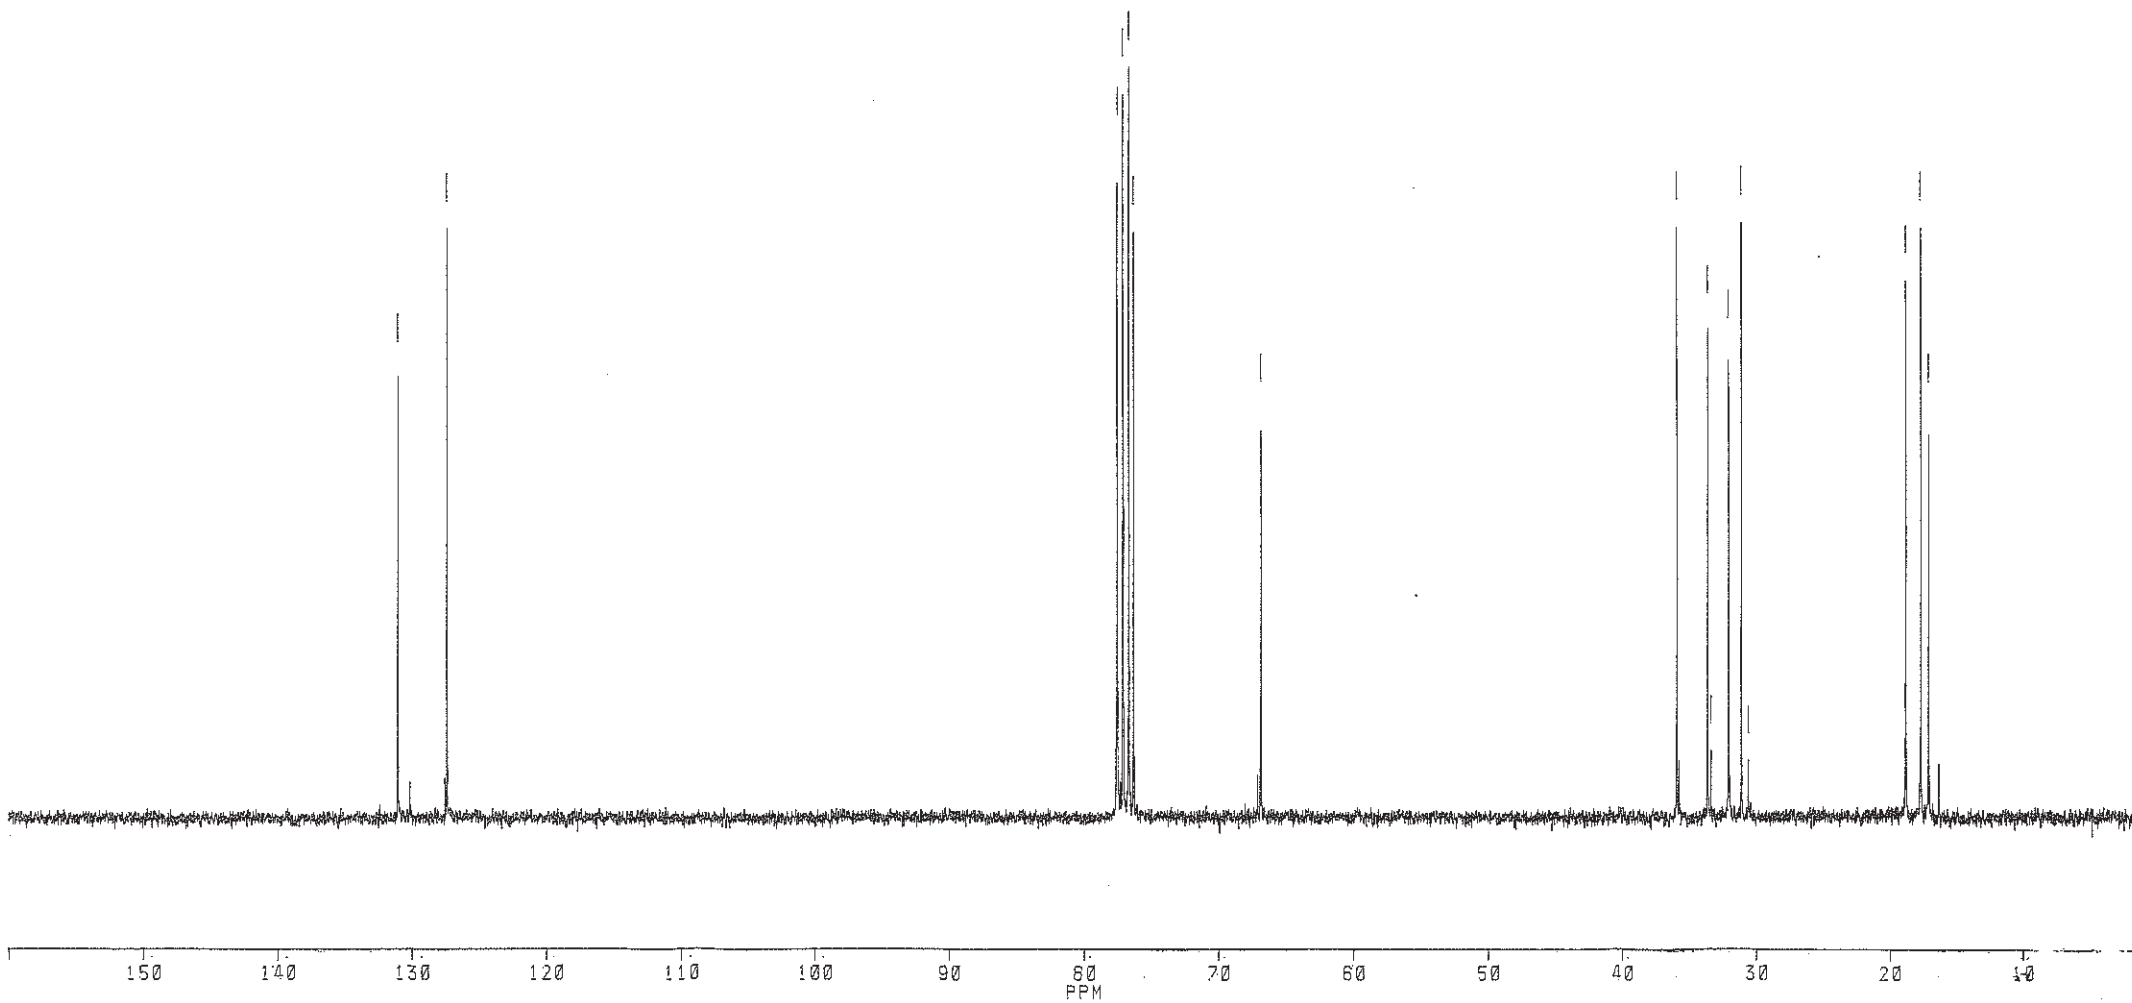



164

J. Carey  
JC 606.1  
cdc19  
961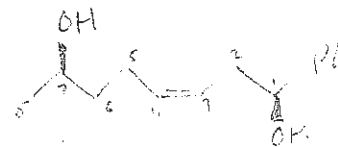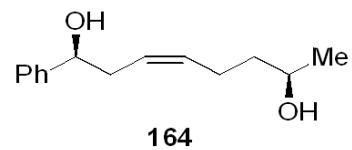

164

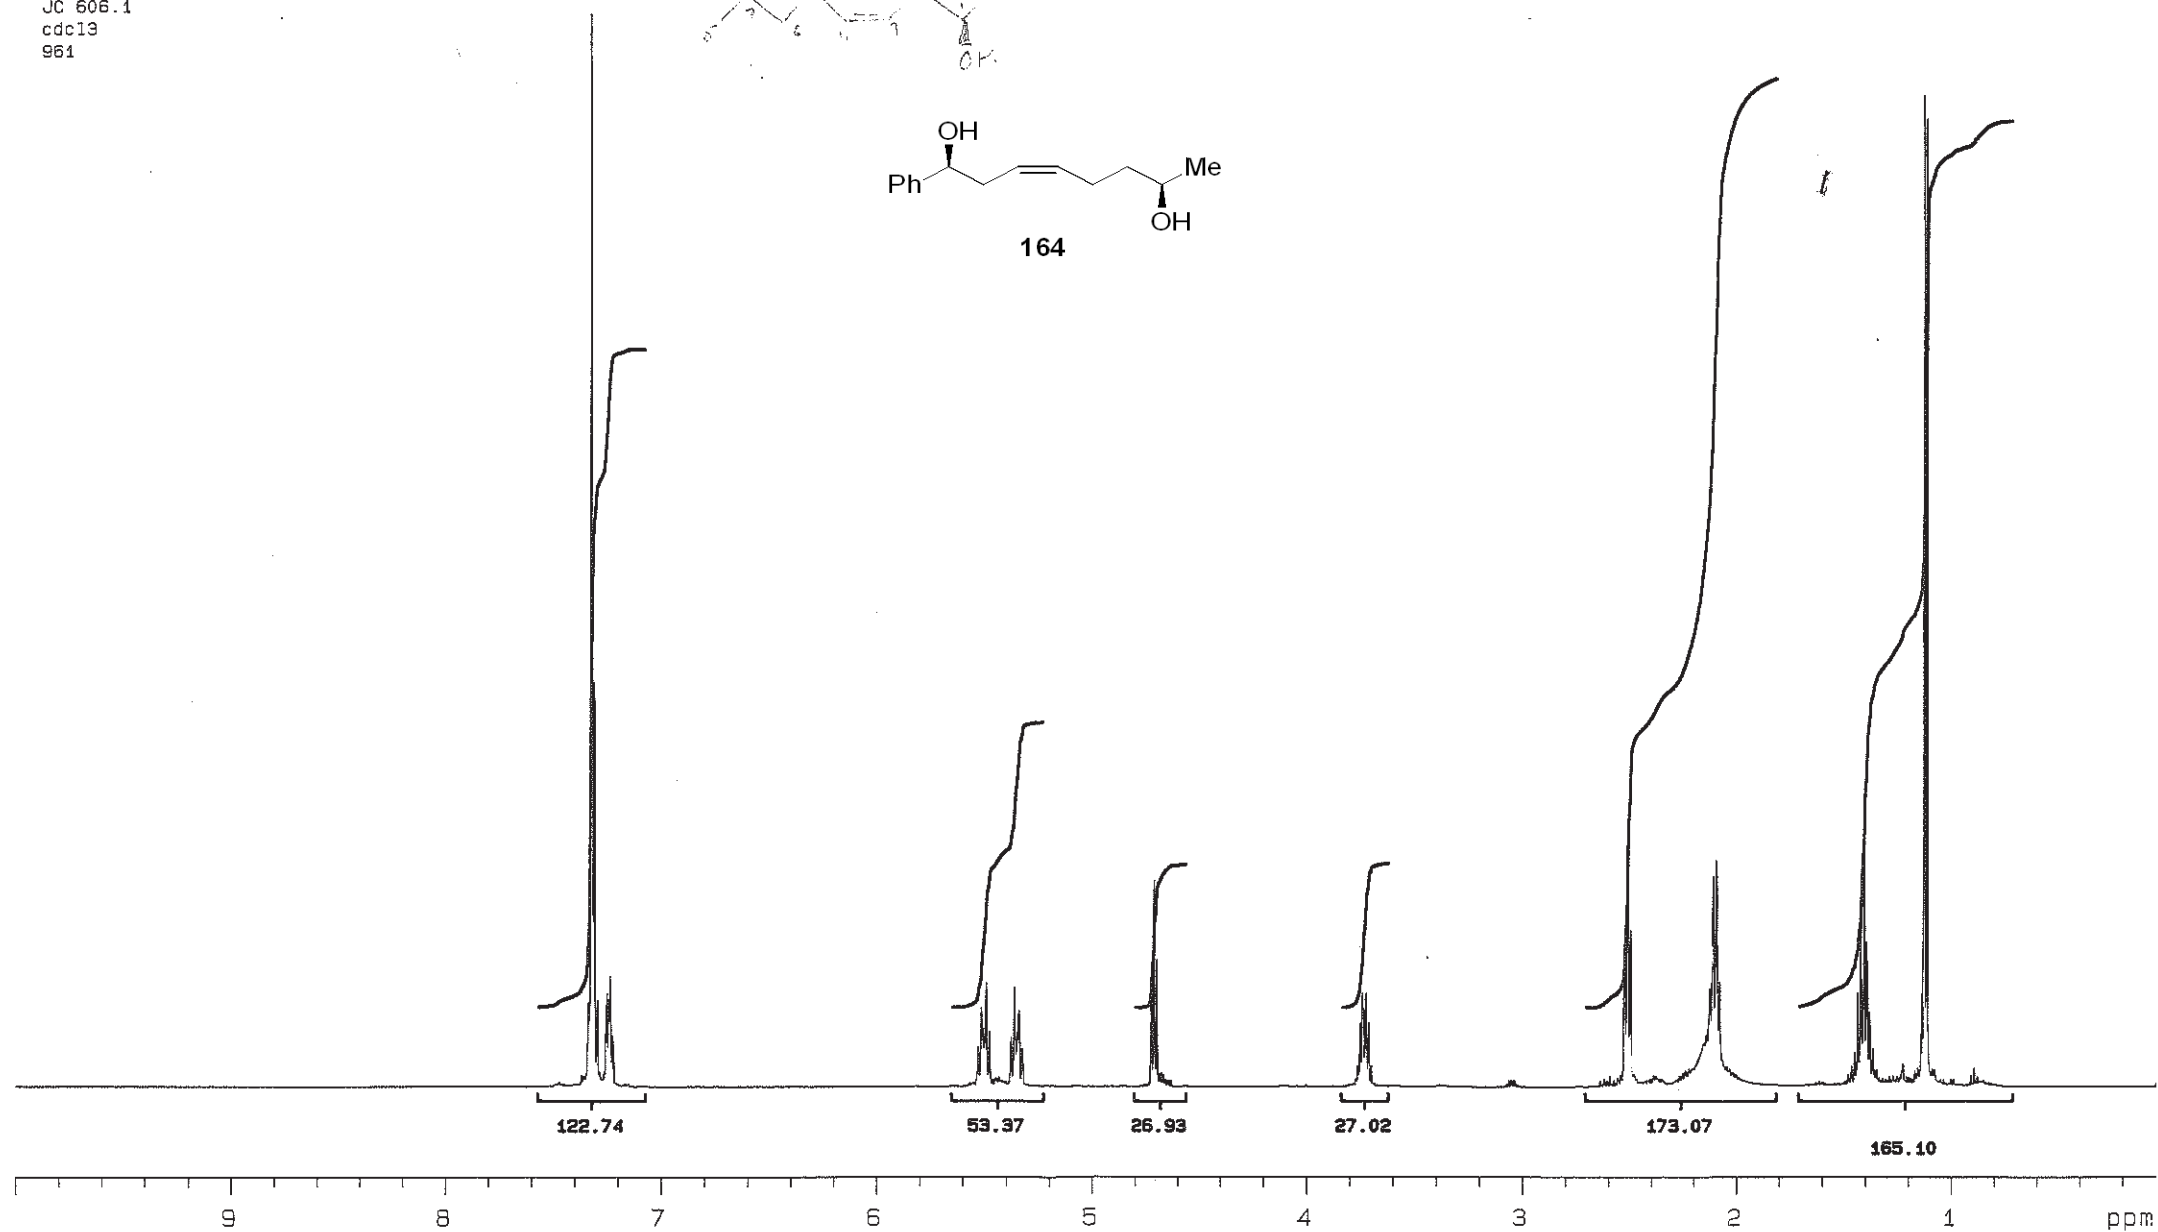

PPM

144.105

132.962

128.356

127.461

125.670

125.102

77.482

77.066

76.657

73.711

67.532

38.629

37.072

23.877

23.601

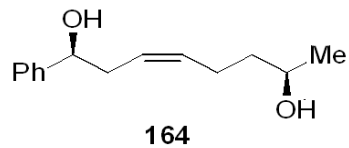

150 140 130 120 110 100 90 80 70 60 50 40 30 20 10

PPM

165

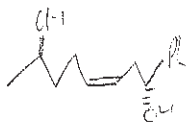

J. Carey  
JC 613.1  
cdc13  
42

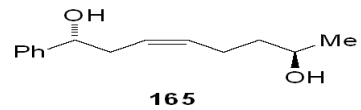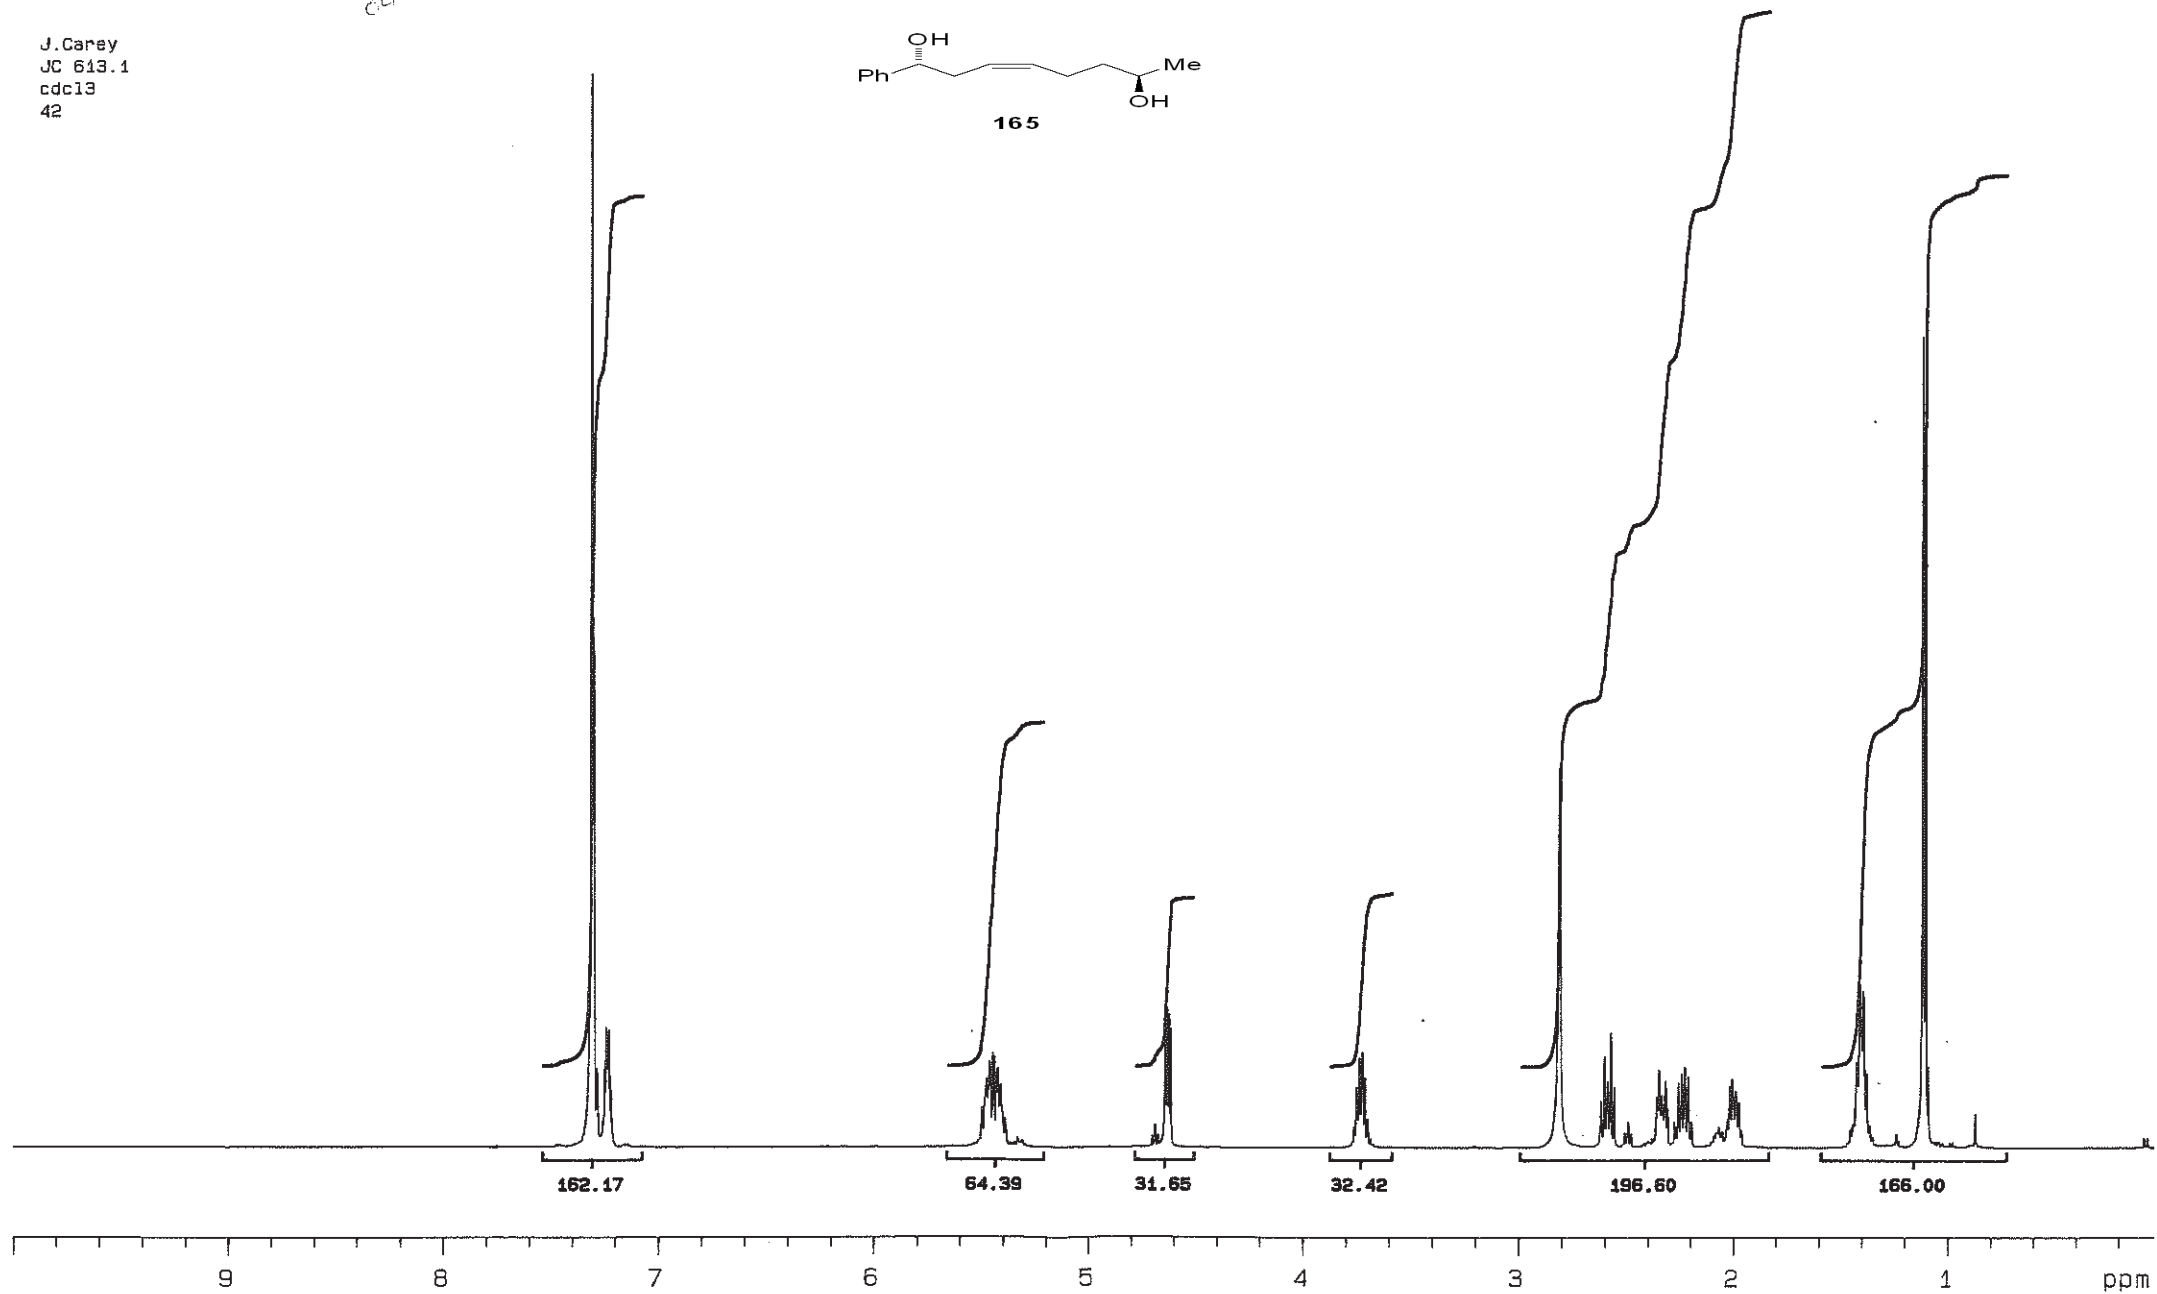

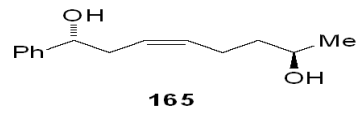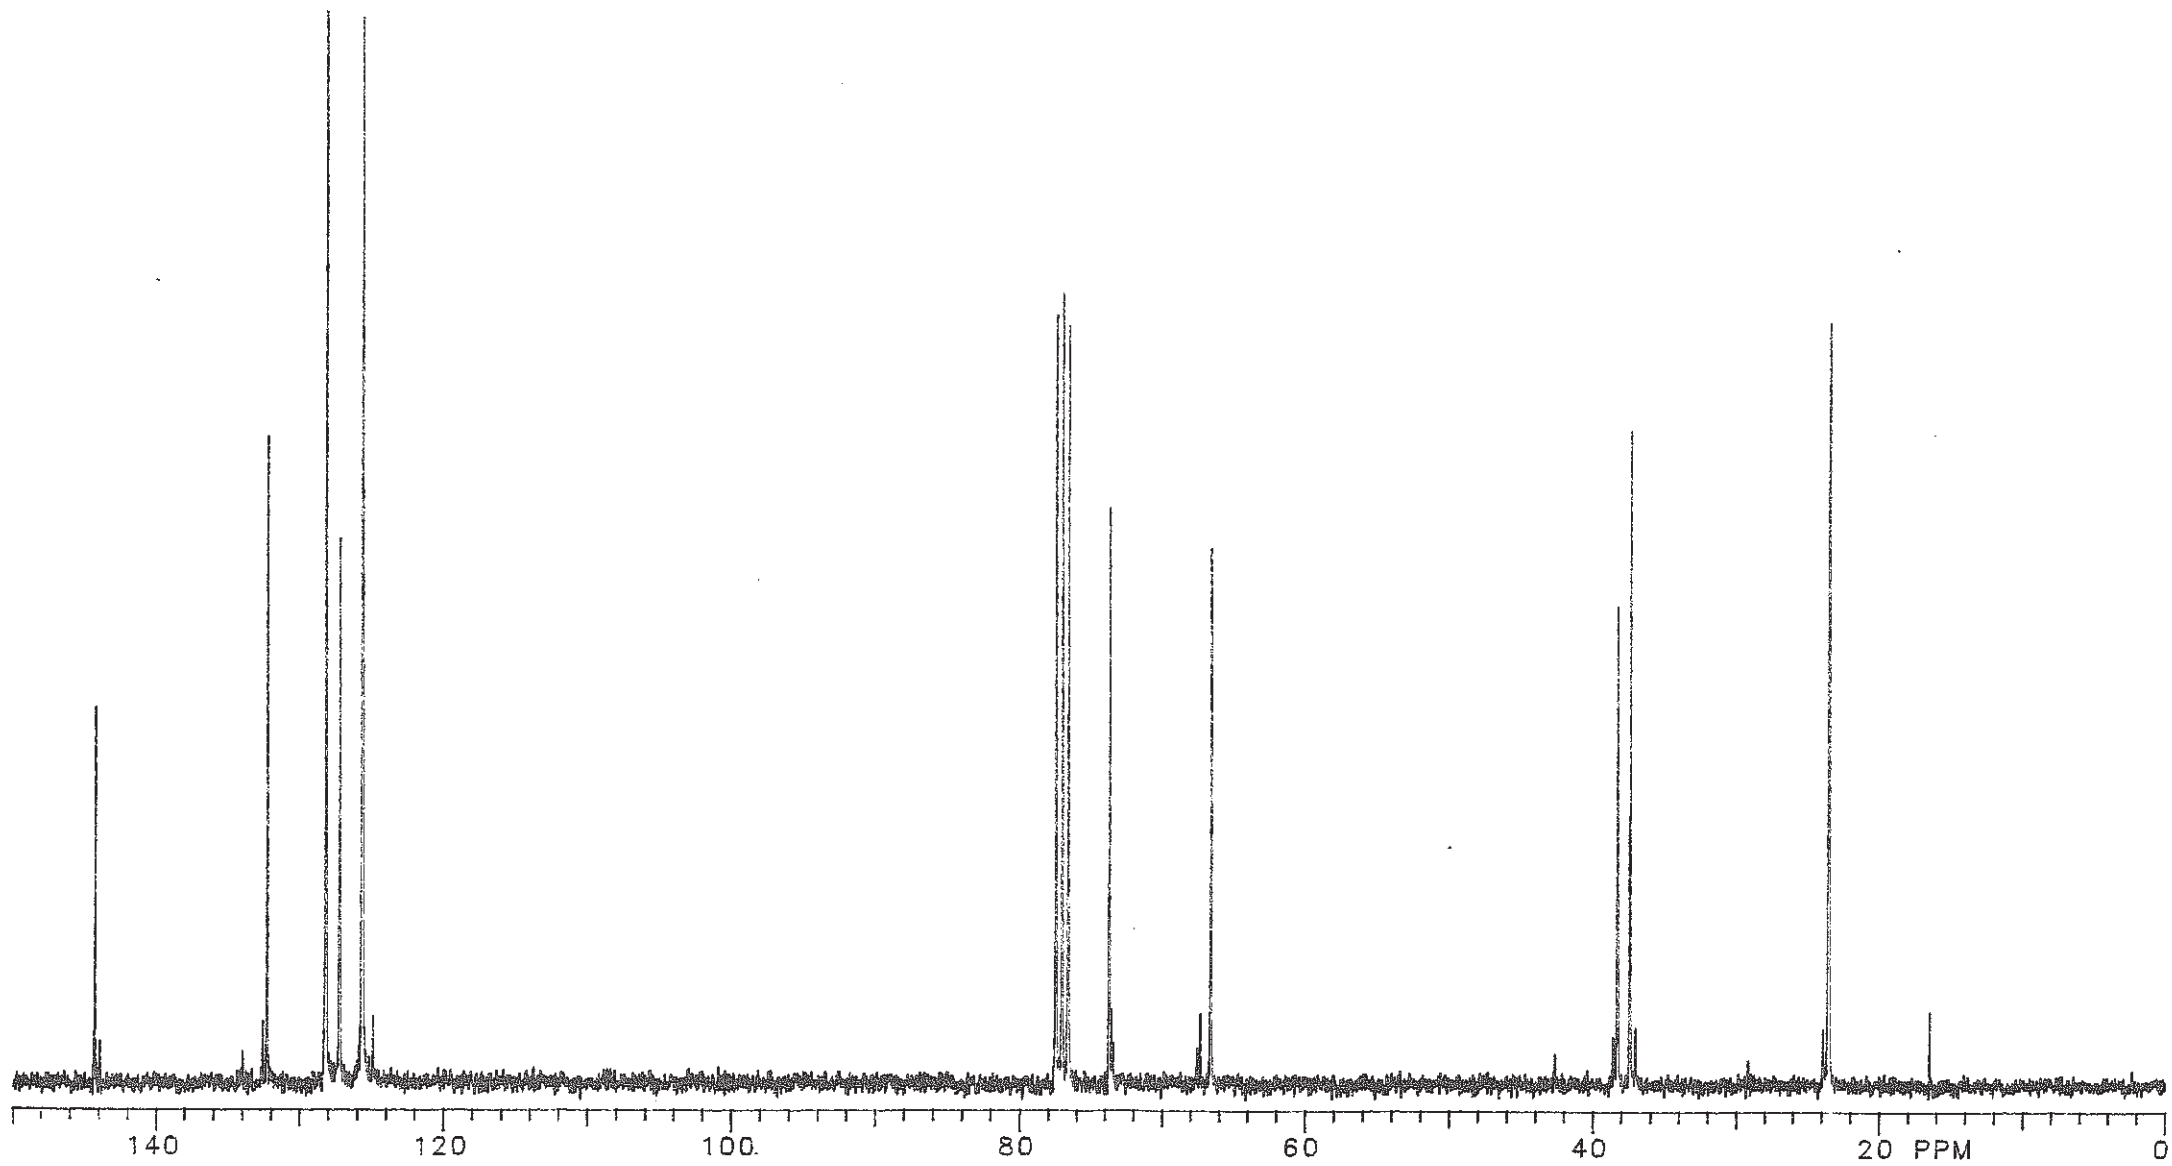

J. Carey  
JC 629.1  
cdc13  
222

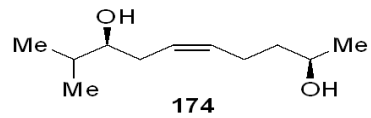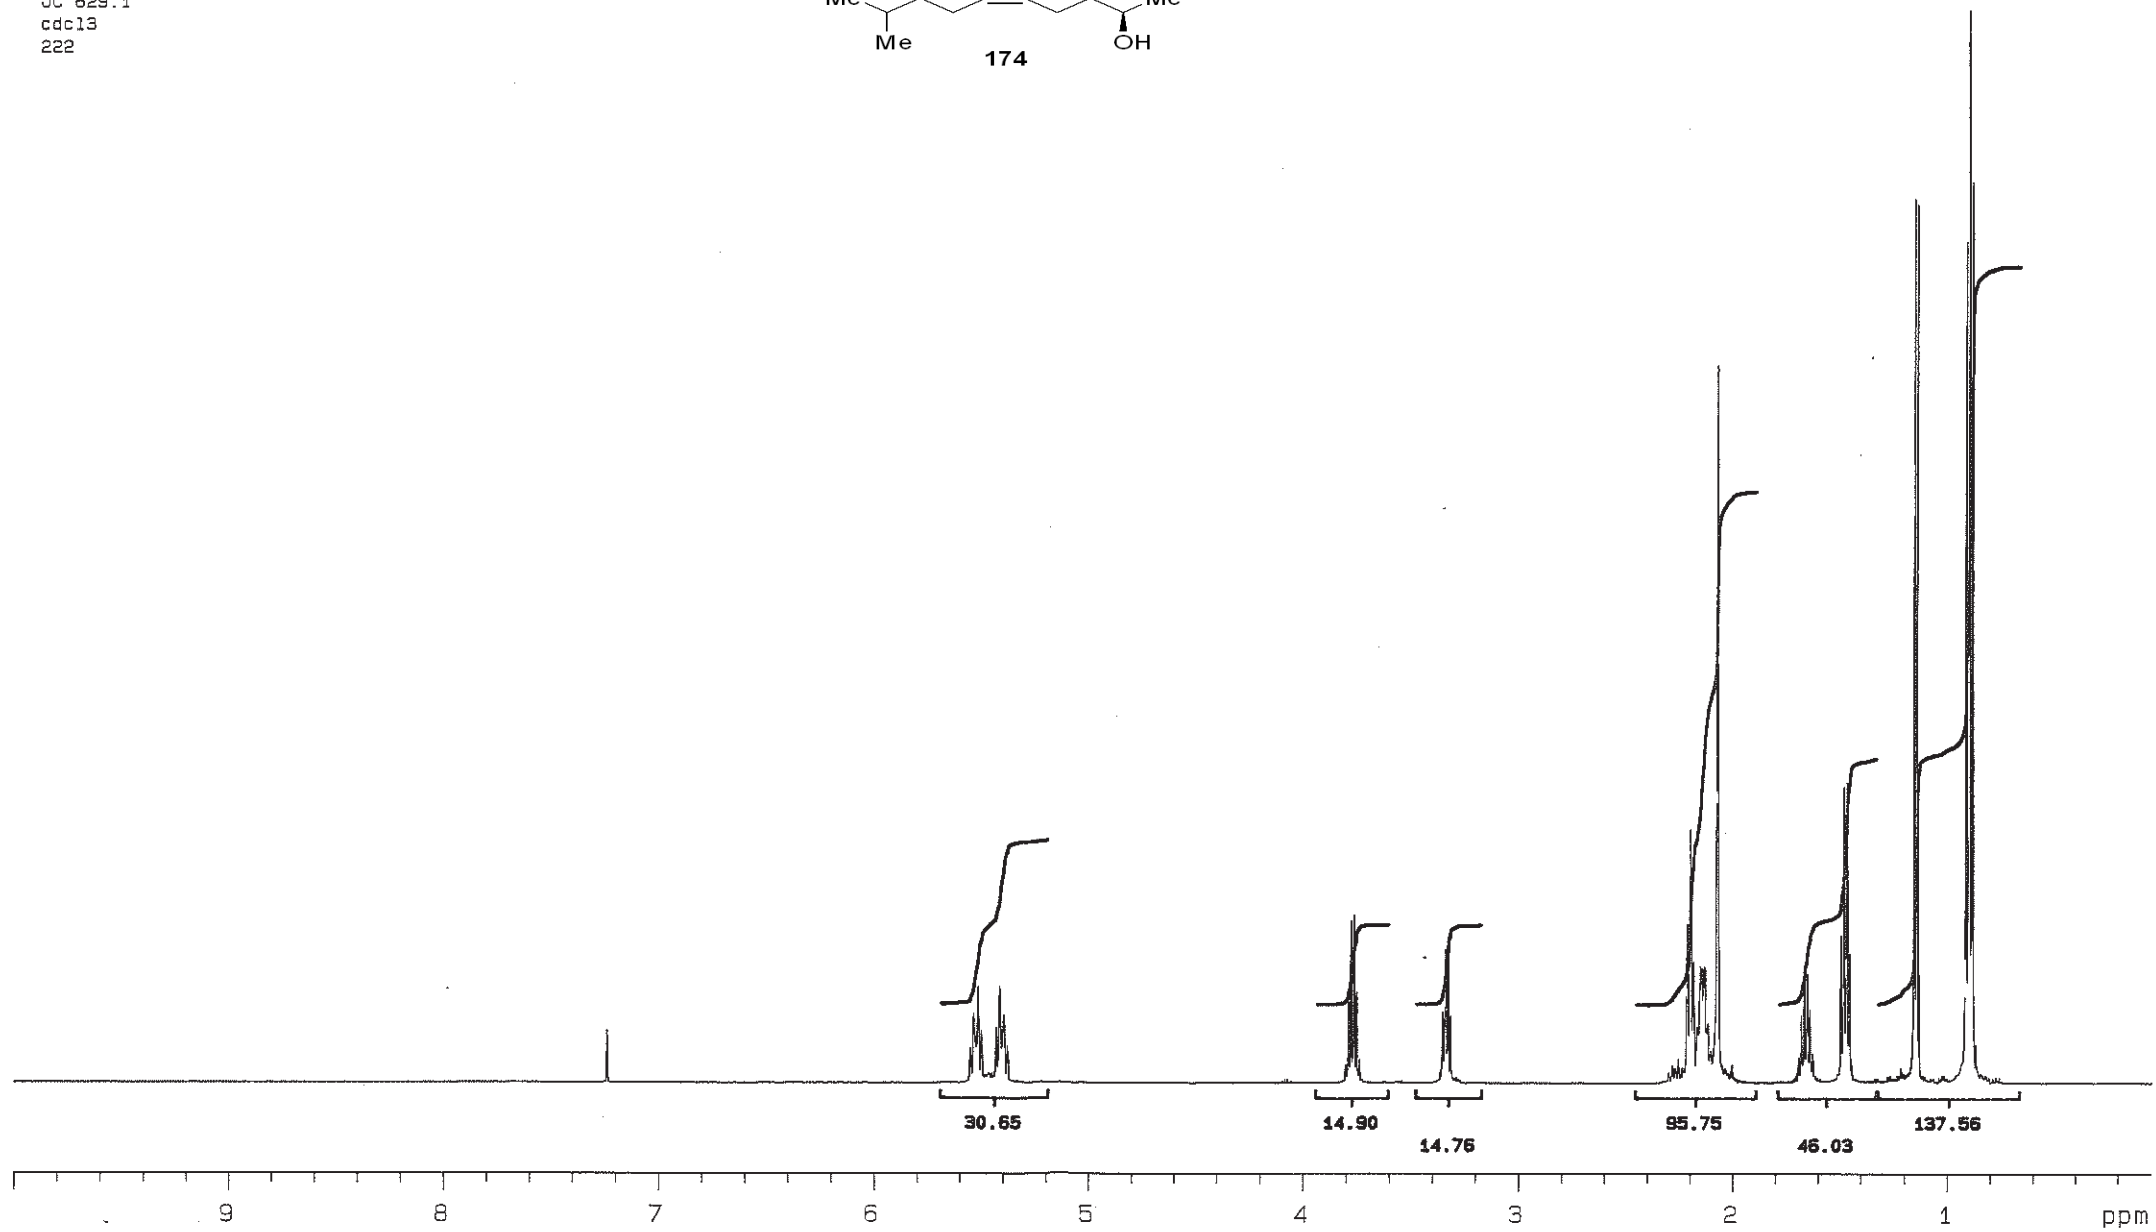

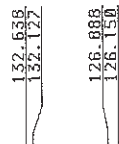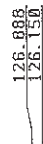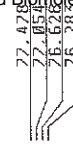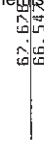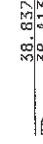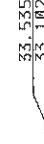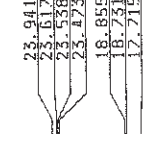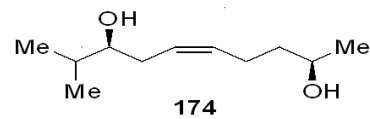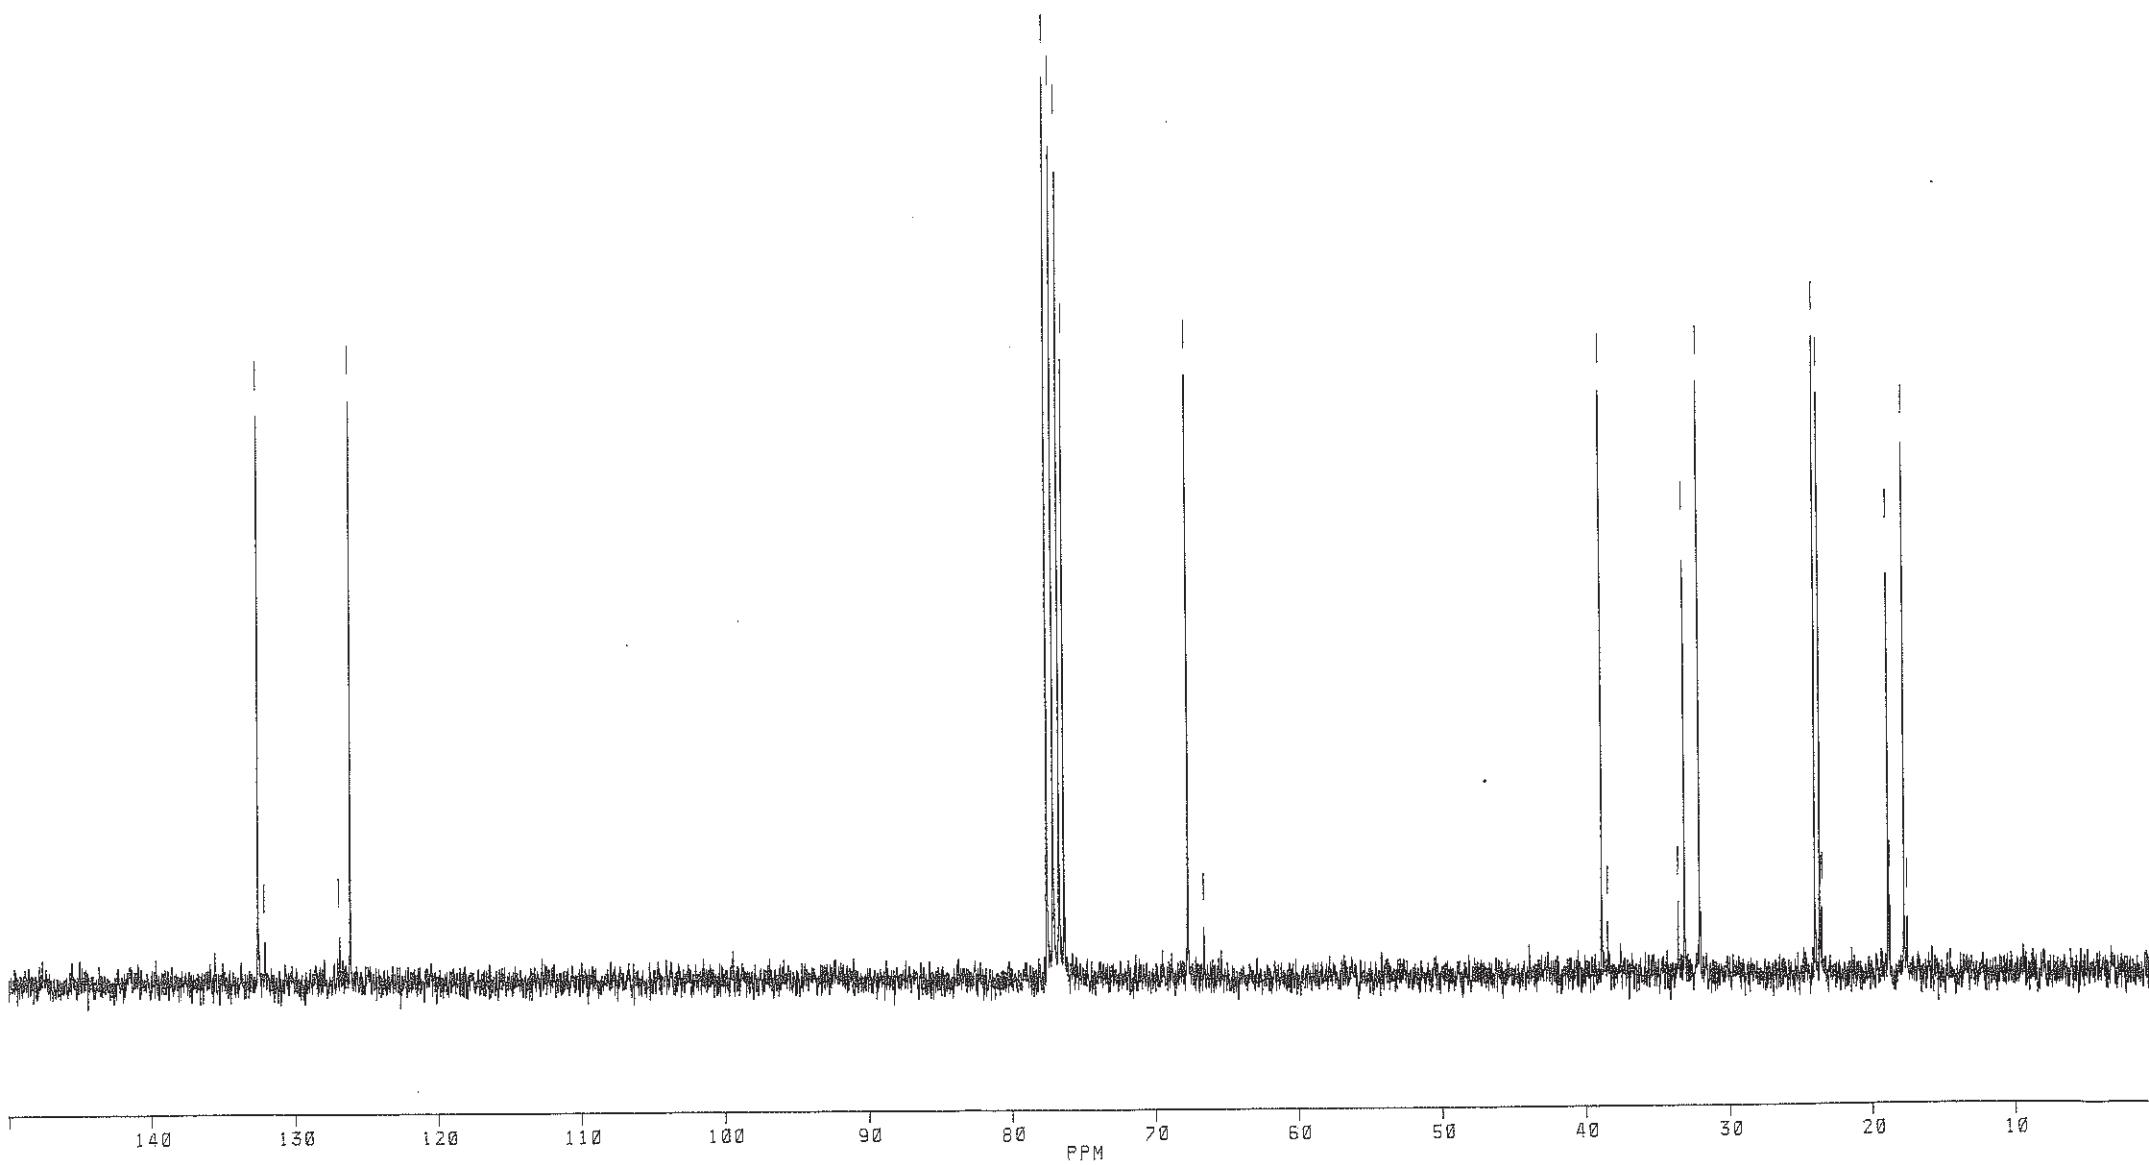

J. Carey  
JC 640.1  
cdc13  
487

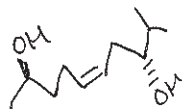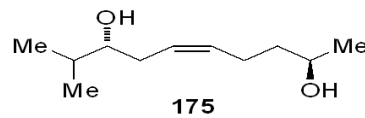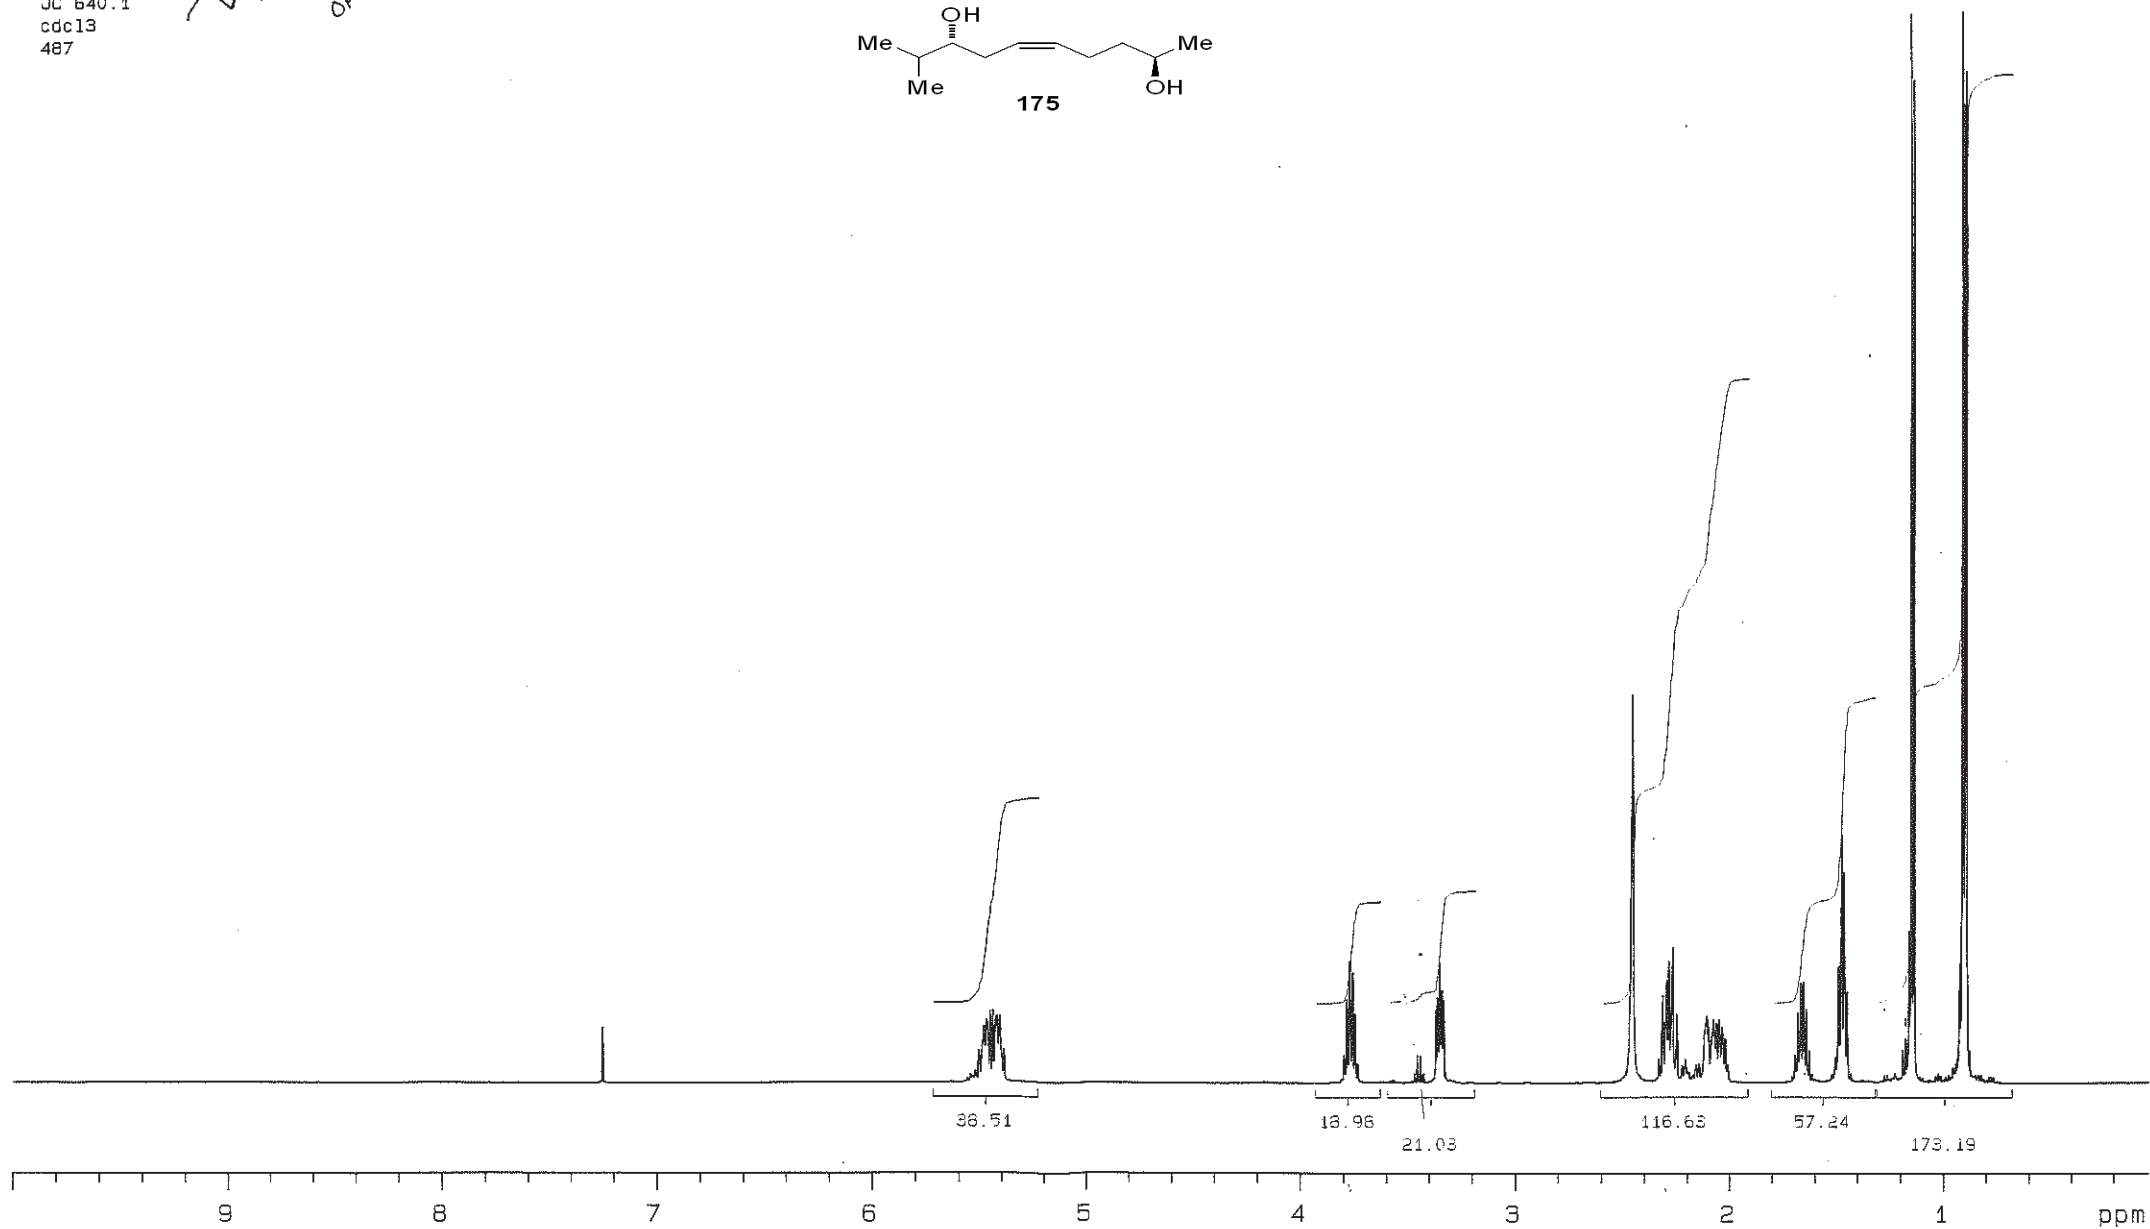

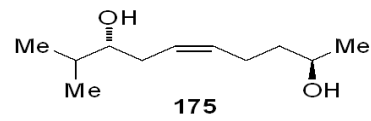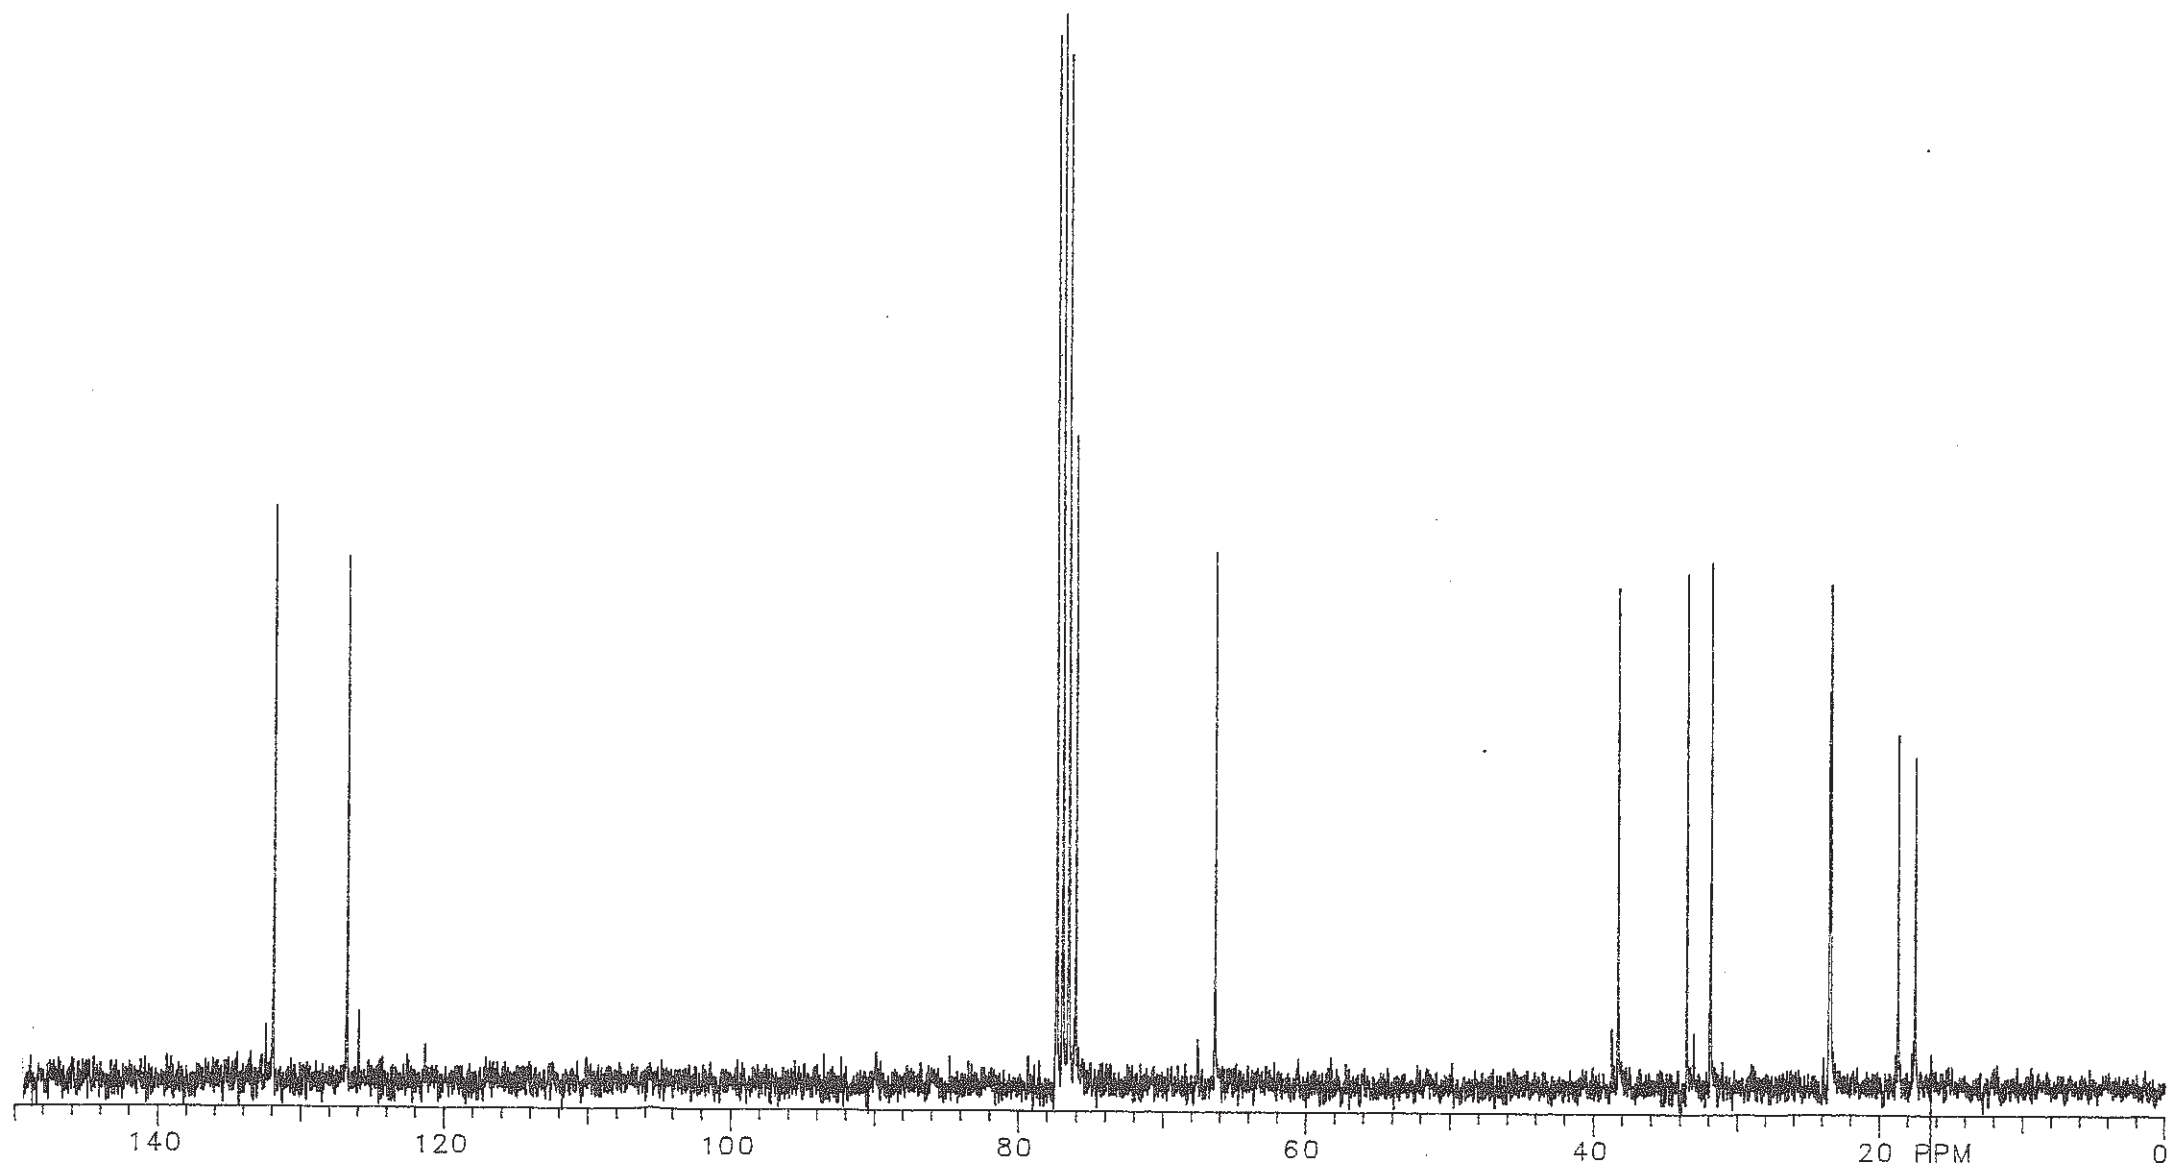



J. Carey  
JC 650.1  
cdc13  
660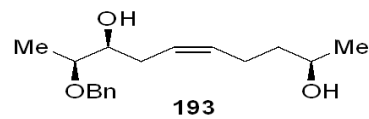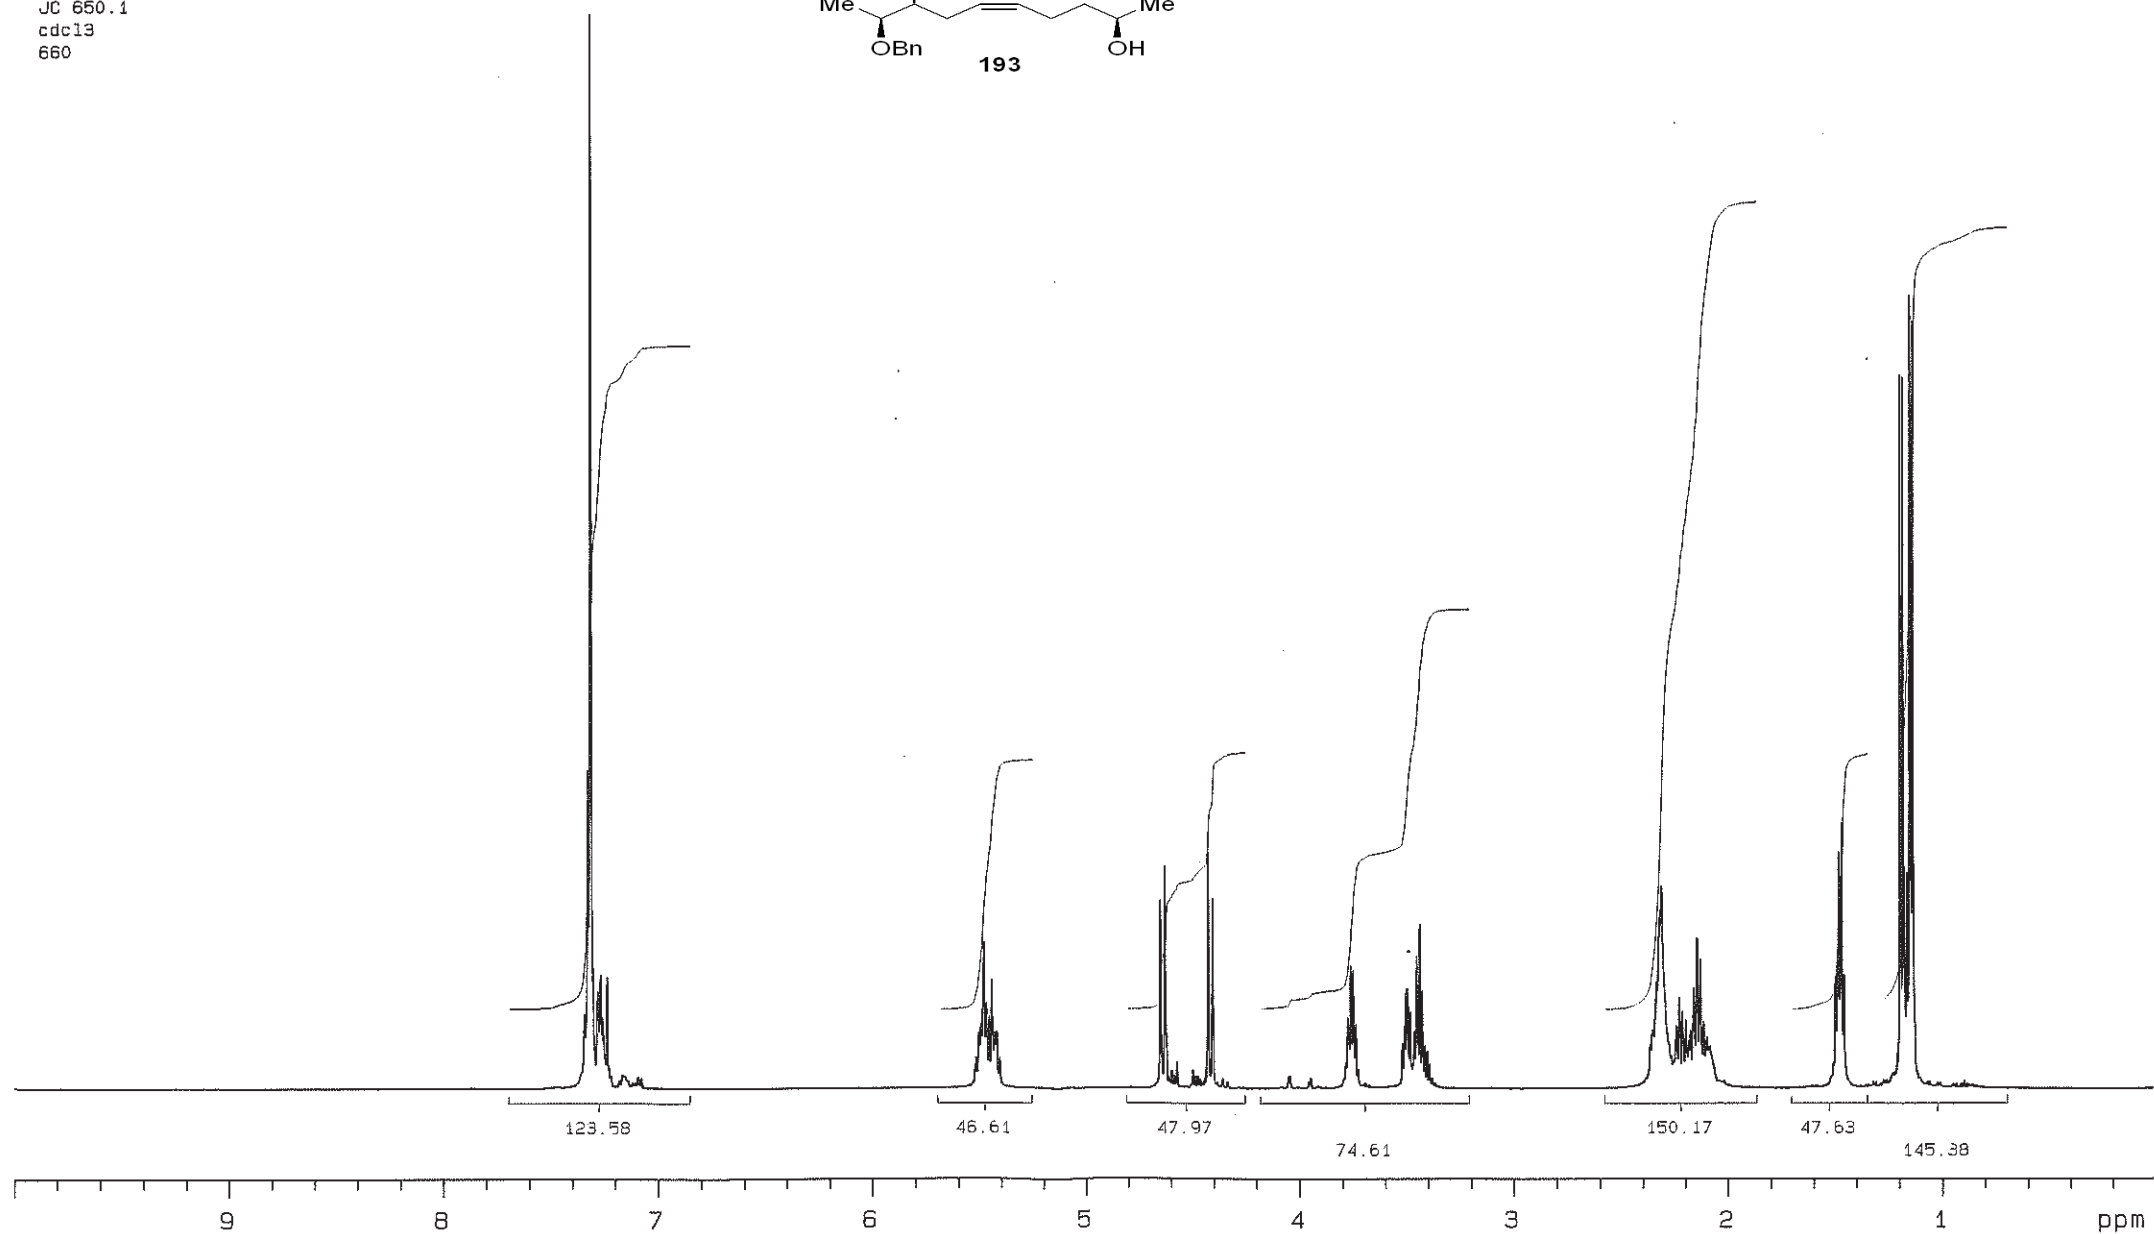

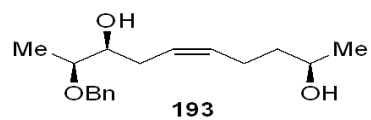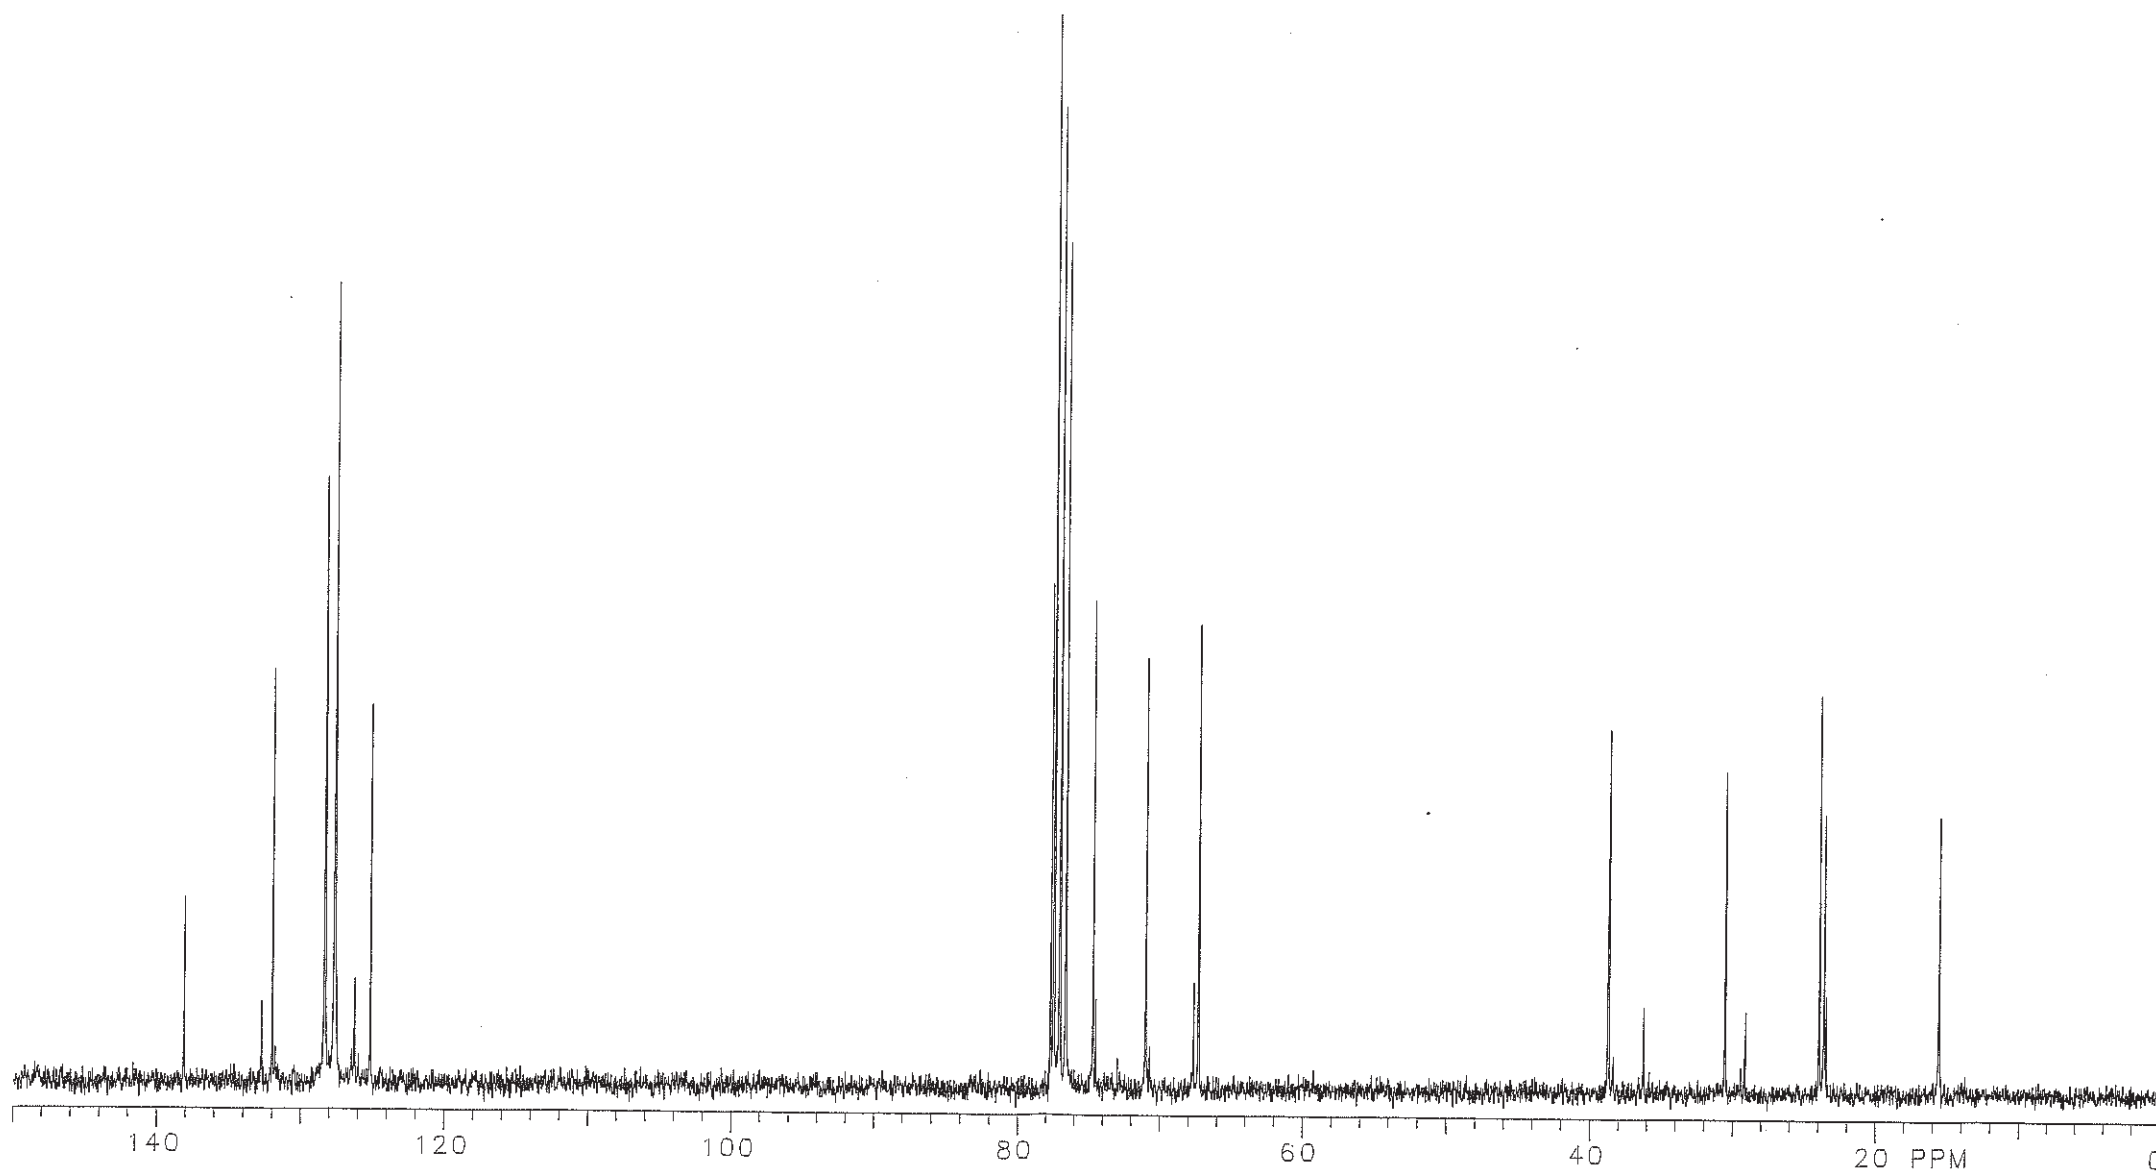

J. Carey  
JC 668.2  
cdc13  
280

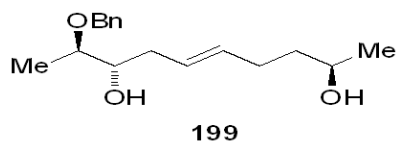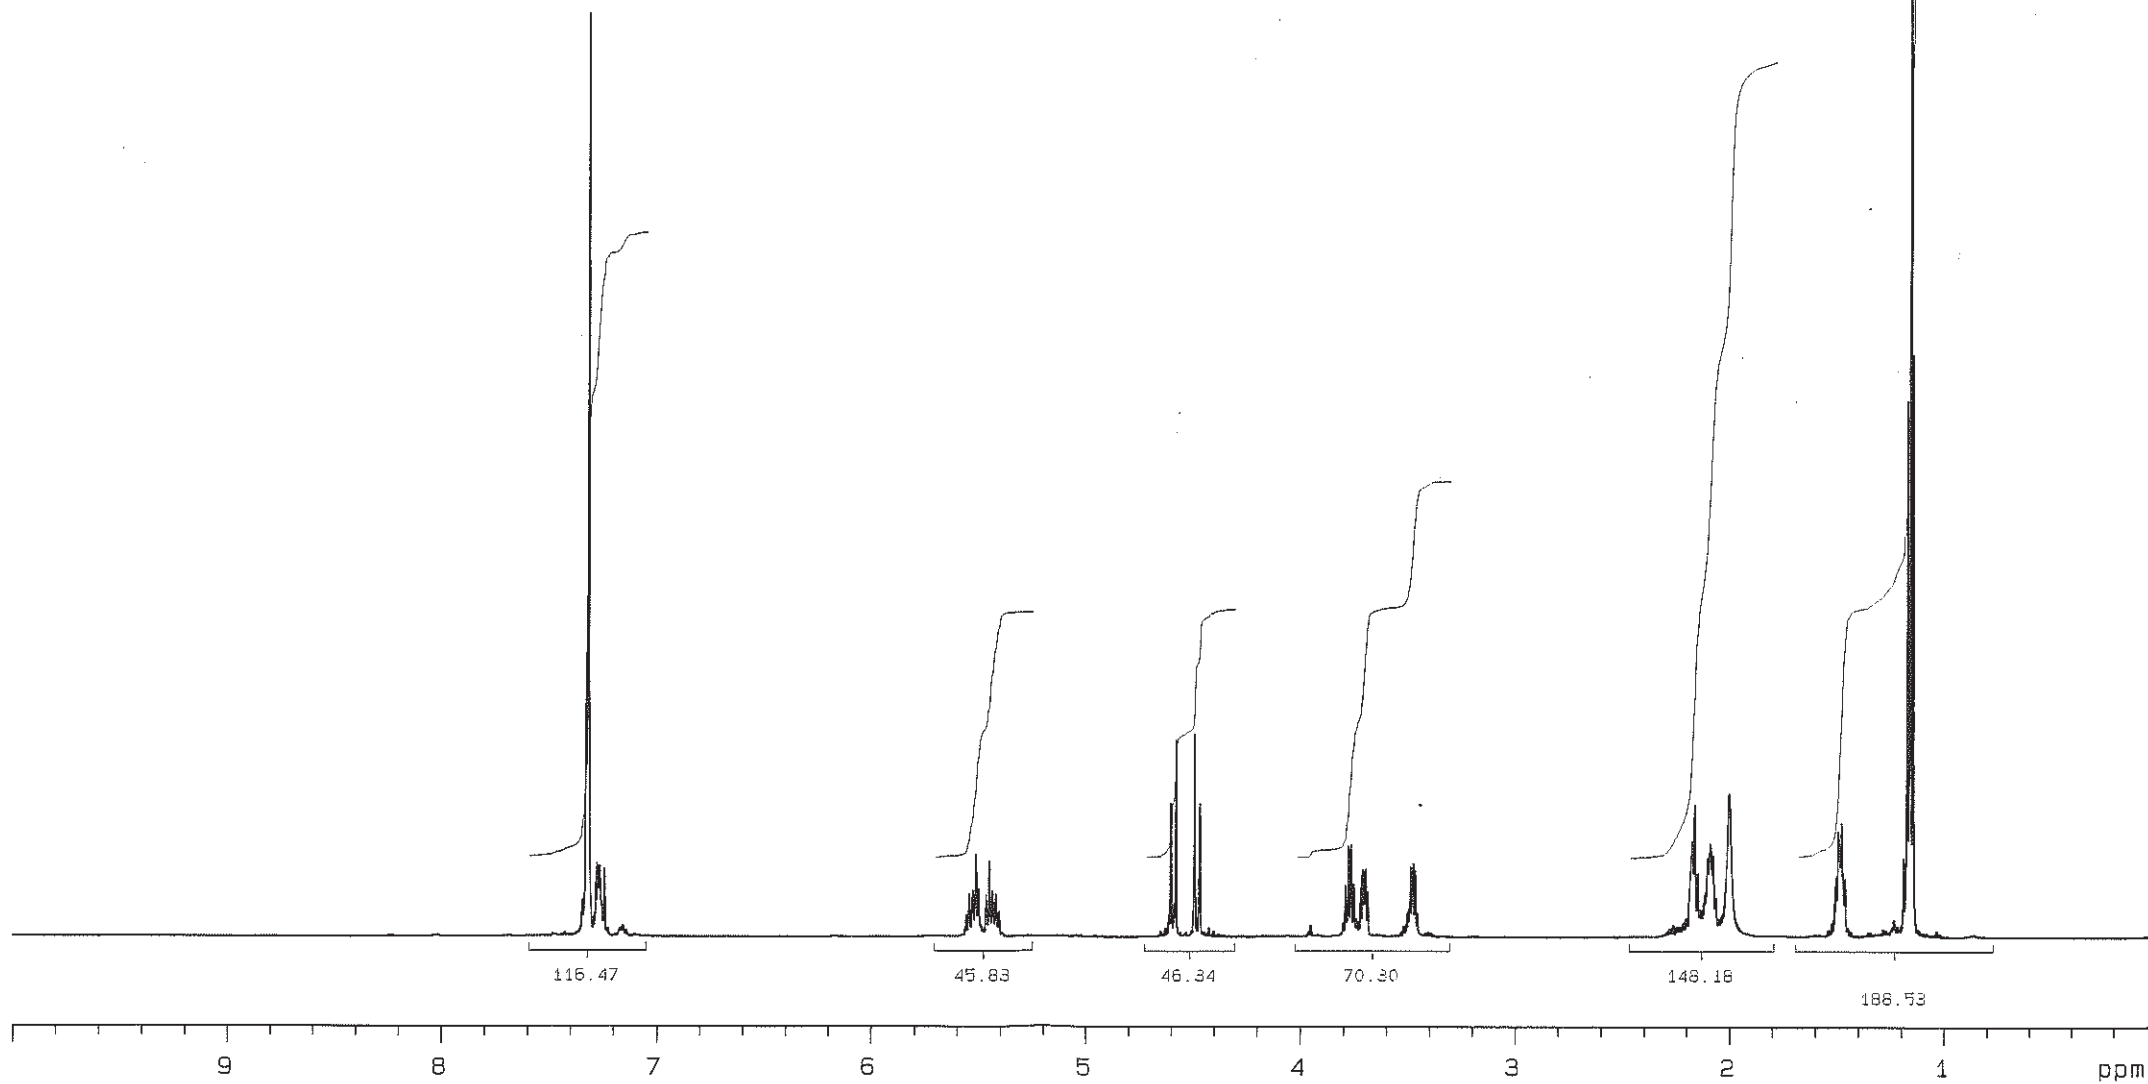

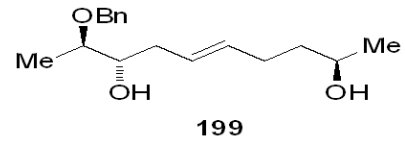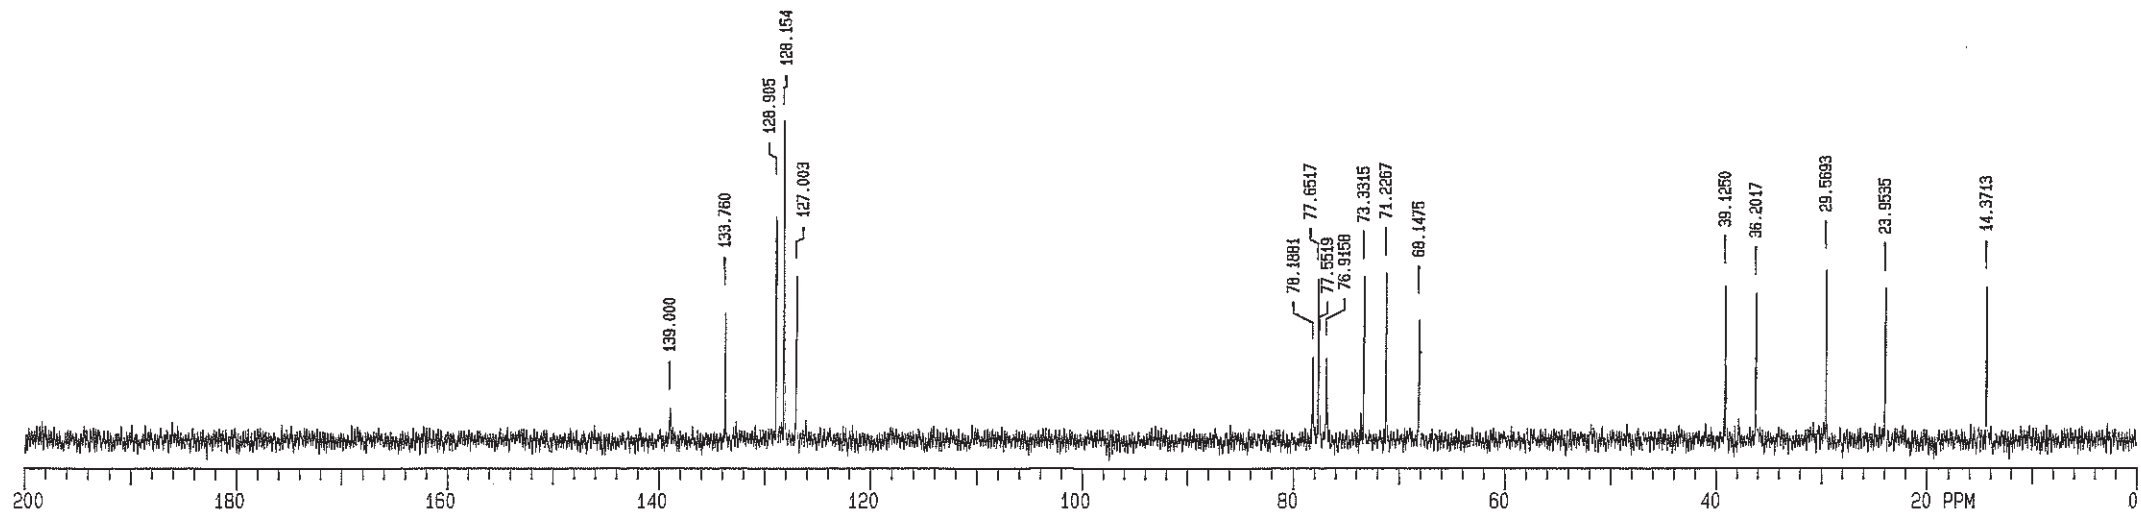

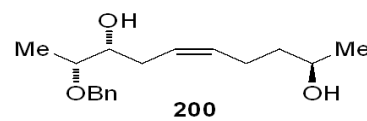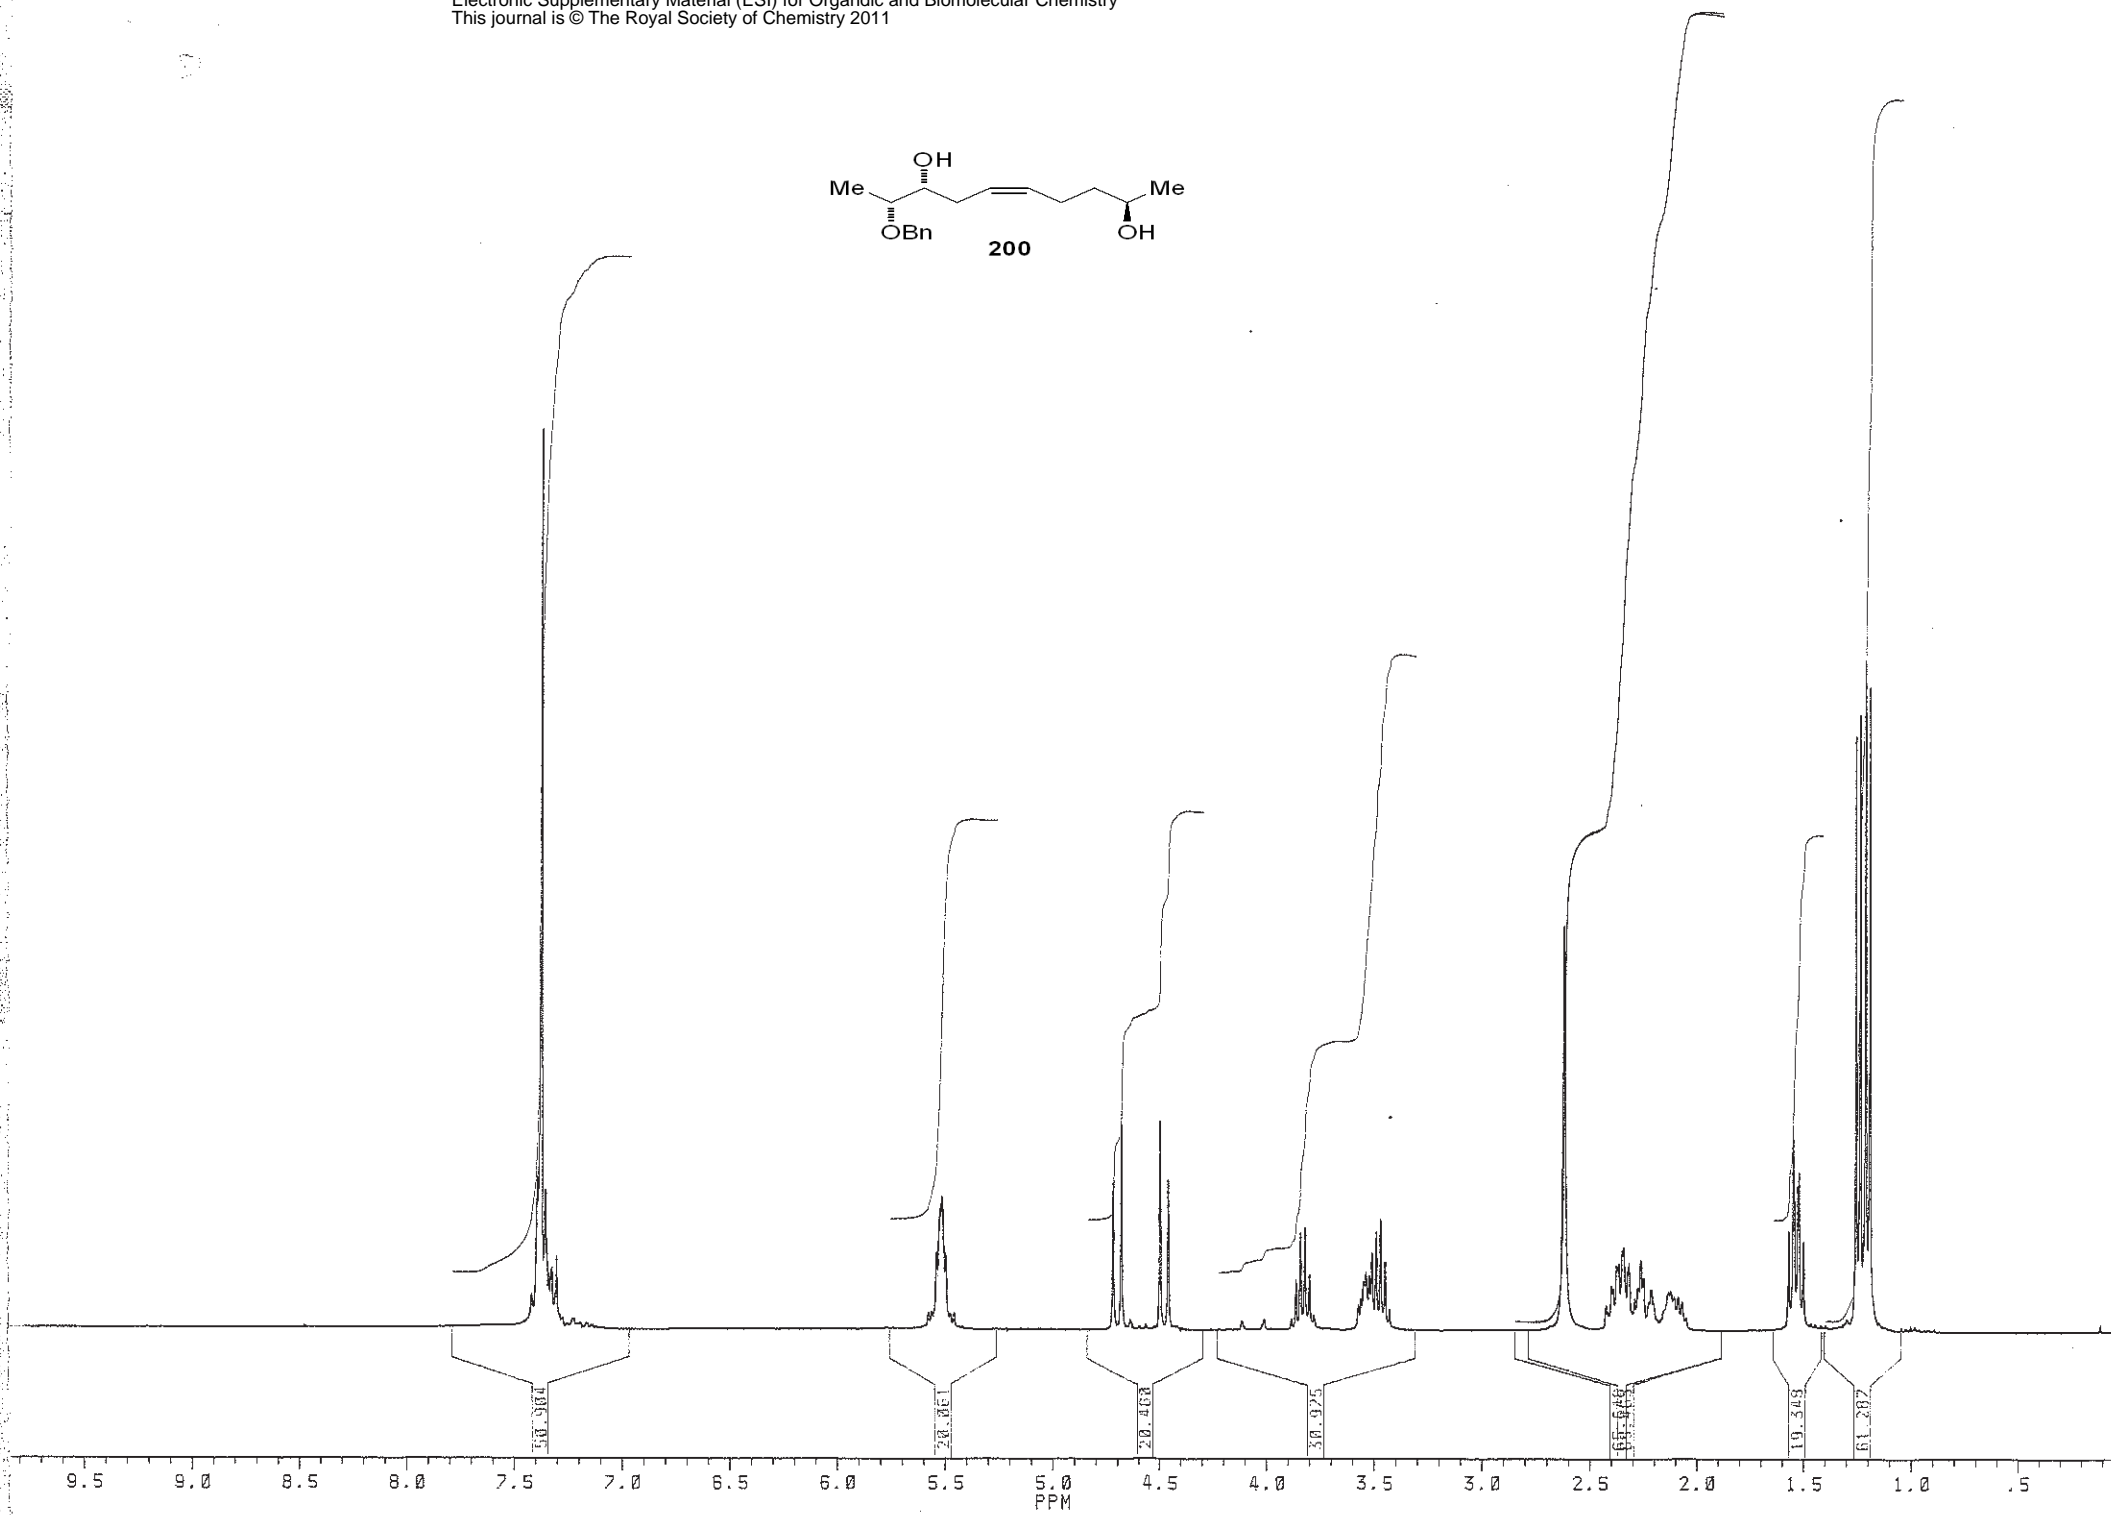

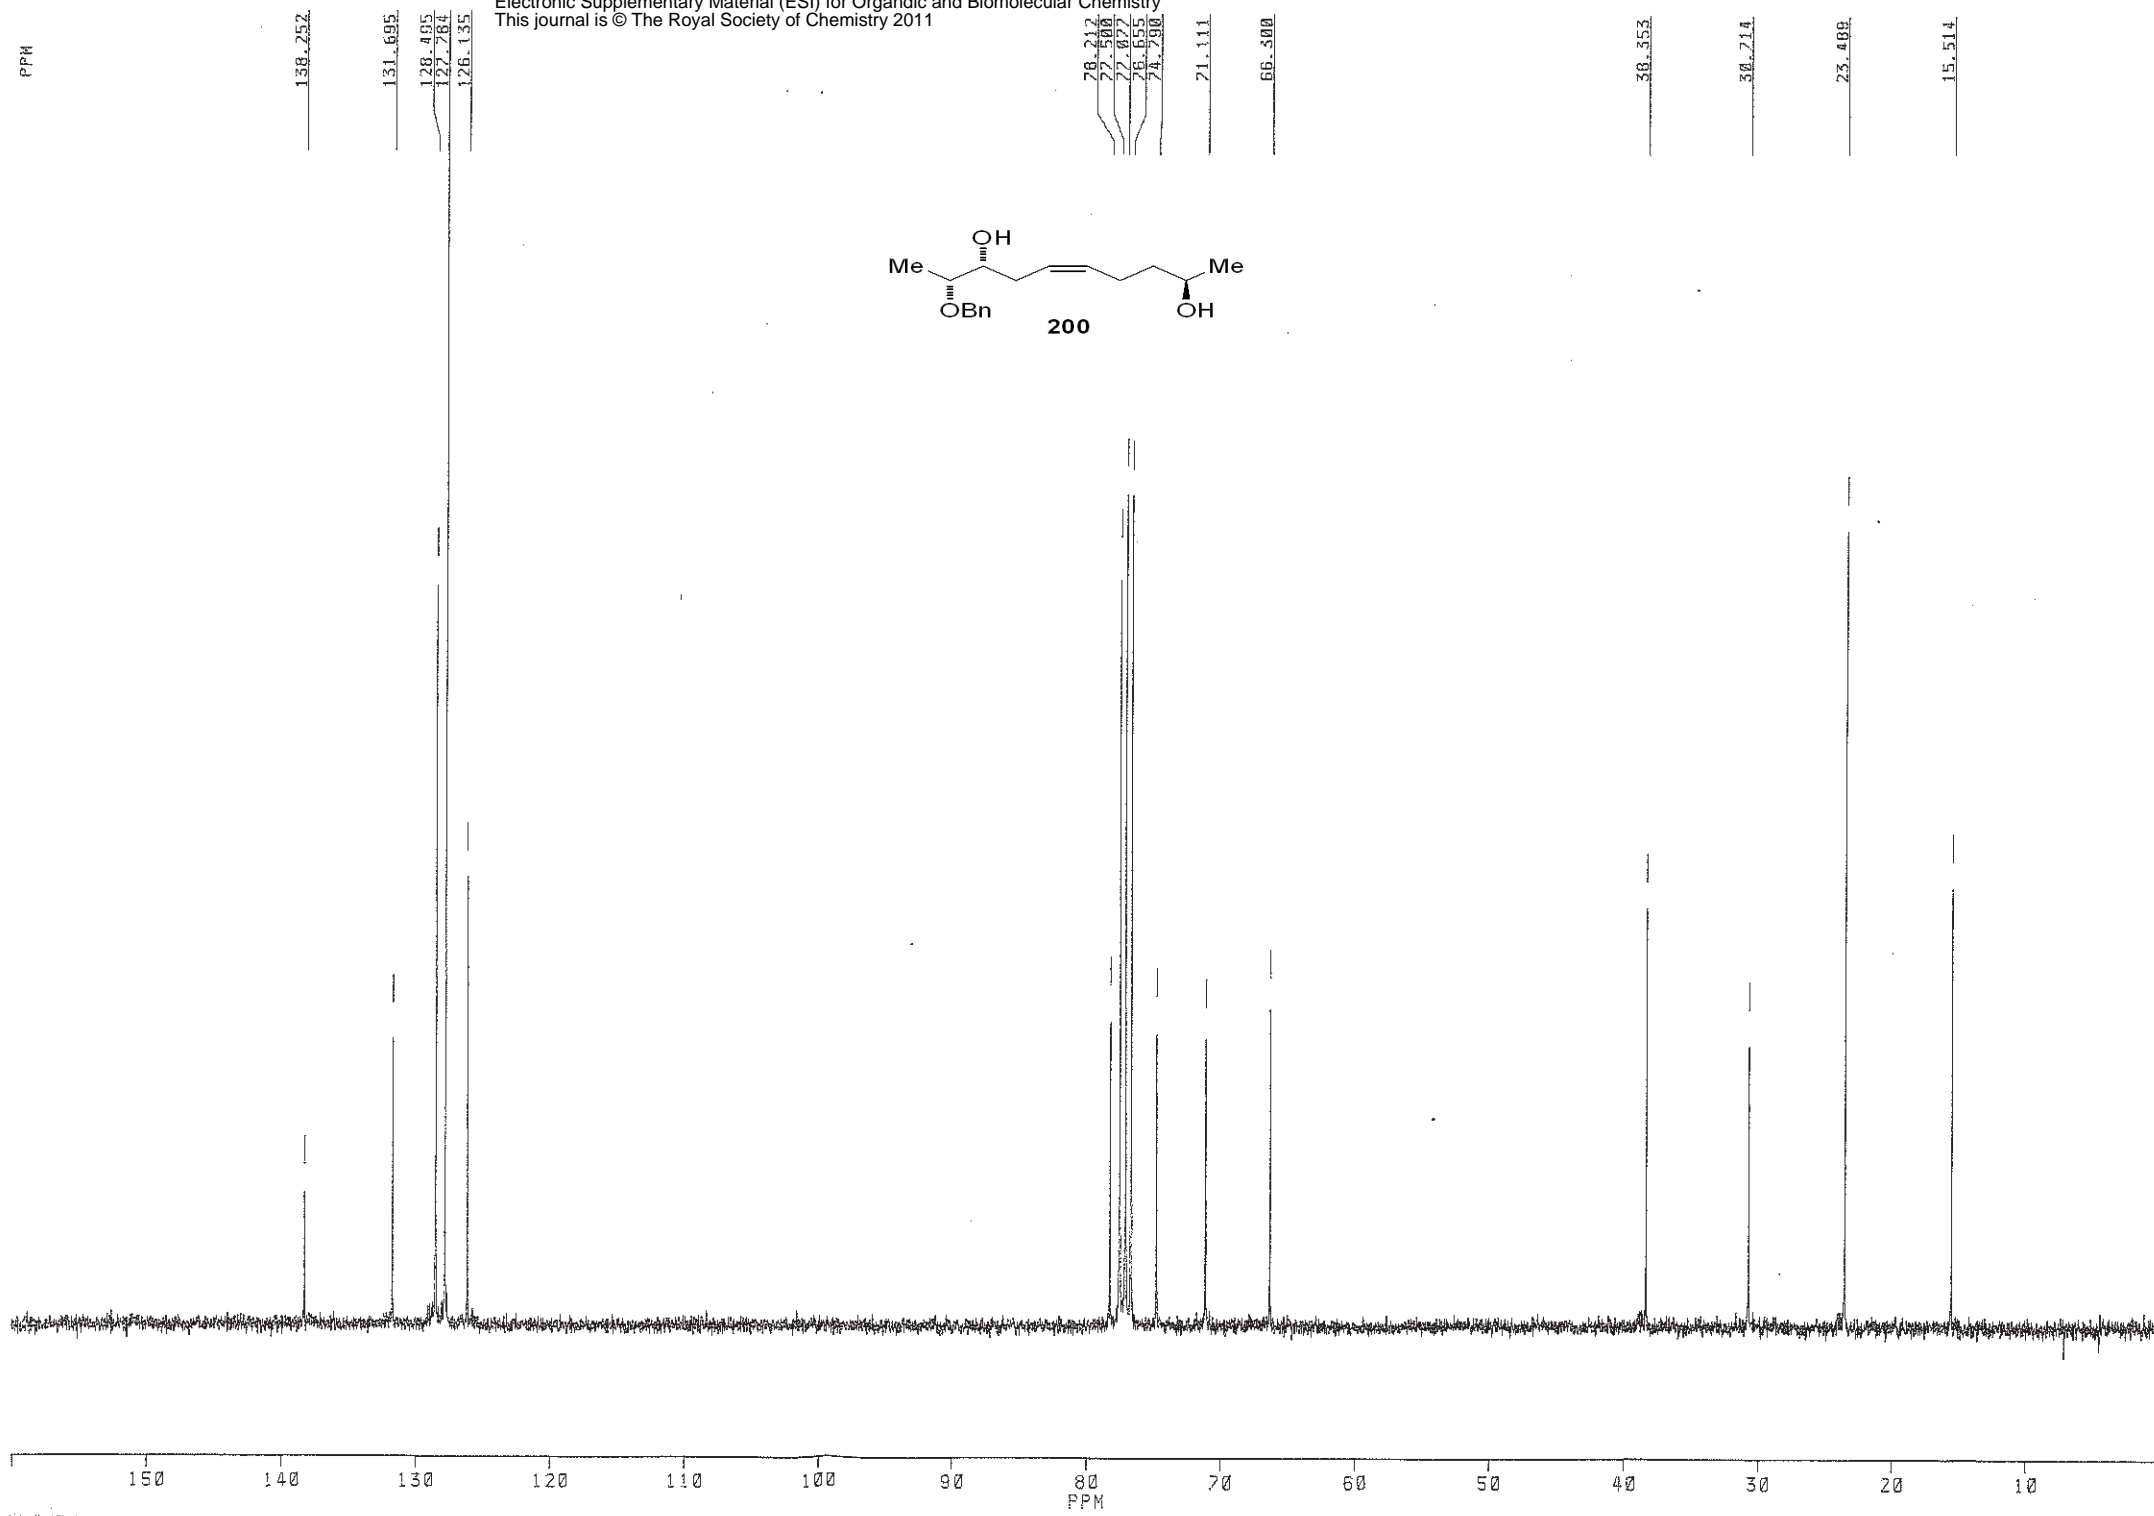

Supplement: c0ob01084g_2.pdf [file c0ob01084g_2.pdf]
